# Supplementary material
Source: publisher figshare collection journal article supplement (https://gsapubs.figshare.com/articles/dataset/_/24431119)
Supplement: Supplementary file 1 [file 1]

## Sheet: Table_S1_GRF_XRF_pet
uniqueID	SAMPLE	Student	petro_student	xrf_student	phi	modal grain	bed	stack	time	lithology	region	solvay	lithofacies	chronofacies	sector	group	DZ	Latitude	Longitude	Section	level	units	formation	Krueger	Gipson	gamma	gamma_K	gamma_U	gamma_T	Qm	F	Lt	Lv	Lsm	qtz	calc	kspar	plag	mica	amph	opaque	intraclast	Duration	Al	sigAl	As	sigAs	Ba	sigBa
1	C5 1.5	MES	MES		1.5	medium	D	8	Wilkins Peak	sandstone	interior		fluvial	mix	C	in		41.217	-109.362	Currant Creek			Wilkins Peak Member							0.508516	0.469586	0.0218978	0	0.0218978	0.455338	0	0.115468	0.305011	0.0610022	0.0217865	0.0087146	0
2	C6 4.5	MES	MES		2.5	fine	D	8	Wilkins Peak	sandstone	interior		fluvial	mix	C	in		41.2167	-109.365	Currant Creek			Wilkins Peak Member							0.514354	0.471292	0.0143541	0	0.0143541	0.439673	0	0.0777096	0.325153	0.0511247	0.0449898	0.0245399	0.00817996
3	FC B2	MES	MES		2.5	fine	B	10	Wilkins Peak	sandstone	interior		fluvial	mix	C	in		41.3508	-109.398	Firehole Canyon			Wilkins Peak Member							0.462921	0.492135	0.0449438	0	0.0359551	0.426829	0	0.107724	0.337398	0.0609756	0.0203252	0.0101626	0.00406504
4	03-MG-2	MES	MES		1.5	medium	T	56	Tipton	sandstone	periphery		fluvial	UT	S	out		41.0247	-109.394	Meadow Gulch			Tipton Member							0.925408	0.02331	0.0512821	0	0.00466201	0.834	0.13	0	0.02	0	0	0	0
5	MG2 1	MES	MES		1.5	medium	T	56	Tipton	sandstone	periphery		fluvial	UT	S	out		41.0293	-109.412	Meadow Gulch			Tipton Member							0.823034	0.0252809	0.151685	0	0.129213	0.767857	0.0739796	0	0.0229592	0	0	0	0.163265
6	MG2 10	MES	MES		0.5	coarse	T	56	Tipton	sandstone	periphery		fluvial	UT	S	out		41.0299	-109.412	Meadow Gulch			Tipton Member							0.877451	0.00735294	0.115196	0	0.0514706	0.834783	0.0978261	0	0.00652174	0	0	0	0.0826087
7	MG2 26.5	MES	MES		0.5	coarse	T	56	Tipton	sandstone	periphery		fluvial	UT	S	out		41.0302	-109.411	Meadow Gulch			Tipton Member							0.850515	0	0.149485	0	0.14433	0.82793	0.0224439	0	0	0	0	0	0.0149626
8	SC 2 9	MES	MES		1.5	medium	B	29	Wilkins Peak	sandstone	periphery		fluvial	UT	S	out		41.0381	-109.412	Spring Creek			Wilkins Peak Member							0.814004	0.0393873	0.146608	0	0.142232	0.755556	0.0484848	0	0.0363636	0.0040404	0	0	0
9	PB 13 (roadcut)	MES	MES		1.5	medium	E	18	Wilkins Peak	sandstone	periphery		fluvial	mix	C	in		41.026	-109.547	Pipeline			Wilkins Peak Member							0.92029	0.0188406	0.0608696	0	0.057971	0.666318	0.278243	0.00523013	0.0083682	0	0	0	0.0460251
11	03-PB-28	MES	MES		1.5	medium	T	18	Tipton	sandstone	periphery		fluvial	mix	C	in		41.0193	-109.561	Pipeline			Tipton Member							0.985795	0.0113636	0.00284091	0	0.00284091	0.969274	0	0.0111732	0	0	0	0	0.0027933
12	03-PB-96.5	MES	MES		0.5	coarse	T	18	Tipton	sandstone	periphery		fluvial	mix	C	in		41.0205	-109.561	Pipeline			Tipton Member							0.965409	0	0.0345912	0	0	0.683871	0.275269	0	0	0	0	0	0.0752688
13	03-PB-207.5	MES	MES		1.5	medium	A	18	Wilkins Peak	sandstone	periphery		fluvial	mix	C	in		41.0219	-109.563	Pipeline			Wilkins Peak Member							0.925234	0.021028	0.0537383	0	0.0233645	0.838115	0.0389344	0	0.0184426	0	0	0	0.0245902
14	03-PB-252	MES	MES		1.5	medium	B	18	Wilkins Peak	sandstone	periphery		fluvial	mix	C	in		41.0232	-109.562	Pipeline			Wilkins Peak Member							0.935282	0.0104384	0.0542797	0	0.0334029	0.93279	0.0244399	0	0.0101833	0	0	0	0
15	PW-2 17.5	MES	MES		1.5	medium	G	25	Wilkins Peak	sandstone	periphery		fluvial	mix	C	in		41.0327	-109.558	Pipeline West			Wilkins Peak Member							0.811005	0.0119617	0.177033	0	0.165072	0.741379	0.0905172	0.00862069	0.00215517	0	0	0.00215517	0.0775862
16	PW-2 19	MES	MES		2.5	fine	G	25	Wilkins Peak	sandstone	periphery		fluvial	mix	C	in		41.0327	-109.558	Pipeline West			Wilkins Peak Member							0.923445	0.0645933	0.0119617	0	0.00478469	0.917453	0.00707547	0.0235849	0.0400943	0	0	0.00707547	0
17	PW-3 20	MES	MES		1.5	medium	H	25	Wilkins Peak	sandstone	periphery		fluvial	mix	C	in		41.0351	-109.56	Pipeline West			Wilkins Peak Member							0.884279	0.0611354	0.0545852	0	0.0502183	0.844398	0.0103734	0.0352697	0.0228216	0	0	0.00829875	0
19	LM 22.4	MES	MES		2.5	fine	T	74	Tipton	sandstone	periphery		fluvial	UT	C	in		41.0976	-109.245	Little Mountain			Tipton							0.853301	0.0635697	0.0831296	0	0.0733496	0.741597	0.0651261	0.0420168	0.012605	0	0.00210084	0.0315126	0.0168067
20	LM 39	MES	MES		1.5	medium	A	74	Wilkins Peak	sandstone	periphery		fluvial	UT	C	in		41.0982	-109.245	Little Mountain			Wilkins Peak Member							0.872527	0.0835165	0.043956	0	0.021978	0.860465	0.0063425	0.0422833	0.038055	0.00211416	0	0.00211416	0.012685
21	LM 66.8	MES	MES		1.5	medium	B	74	Wilkins Peak	sandstone	periphery		fluvial	UT	C	in		41.0995	-109.246	Little Mountain			Wilkins Peak Member							0.924779	0.0309735	0.0442478	0	0.0420354	0.903017	0.00431035	0.00862069	0.0215517	0	0.00215517	0.00215517	0.00646552
22	LM 70	MES	MES		0.5	coarse	B	74	Wilkins Peak	sandstone	periphery		fluvial	UT	C	in		41.1	-109.246	Little Mountain			Wilkins Peak Member							0.946939	0.0204082	0.0326531	0	0.0285714	0.949084	0.00203666	0.0162933	0.00407332	0	0	0	0
23	03-RM-1	MES	MES		1.5	medium	T	66	Tipton	sandstone	periphery		fluvial	UT	S	out		41.0326	-109.311	Richards Mountain			Tipton Member							0.914286	0.00612245	0.0795918	0	0.0673469	0.908	0.012	0	0.006	0	0	0	0
24	03-RM-2	MES	MES		1.5	medium	T	66	Tipton	sandstone	periphery		fluvial	UT	S	out		41.0326	-109.311	Richards Mountain			Tipton Member							0.871359	0.00242718	0.126214	0	0.109223	0.733467	0.172345	0	0.00200401	0	0	0	0
25	03-KM-1	MES	MES		1.5	medium	I	69	Wilkins Peak	sandstone	periphery		fluvial	mix	C	in		41.0839	-109.35	Krause Marsh Creek			Wilkins Peak Member							0.847561	0.00609756	0.146341	0	0.138211	0.842	0.006	0	0.006	0	0	0	0
26	03-RD-1	MES	MES		2.5	fine	T	64	Tipton	sandstone	periphery		fluvial	UT	S	out		41.0296	-109.468	Rawlins Draw			Tipton Member							0.92069	0.0206897	0.0586207	0	0.0551724	0.536	0.364	0	0.012	0	0	0.002	0
27	03-RD-2	MES	MES		1.5	medium	T	64	Tipton	sandstone	periphery		fluvial	UT	S	out		41.0296	-109.468	Rawlins Draw			Tipton Member							0.893506	0.00519481	0.101299	0	0.0883117	0.775556	0.115556	0	0.00444444	0	0	0	0.111111
28	22-MCP	AH	AH	mes	1.25	mu	CB	82	Wilkins Peak	sandstone	exterior		fluvial	CO-1	SE	out	uw	41.0861	-107.945	McPherson Springs			Cathedral Bluffs Member							0.498542	0.332362	0.169096	0.0349854	0.0670554	0.532967	0	0.266484	0.0467033	0.0549451	0	0	0	363	54333.8	1256.03	0	6.85	914.19	42.68
29	22-SCD2	AH	AH	mes	1.25	mu	CB	83	Wilkins Peak	sandstone	exterior		fluvial	CO-1	SE	out	uw	41.0956	-107.929	Sand Creek Delta			Cathedral Bluffs Member							0.529716	0.372093	0.0981912	0.0155039	0.0697674	0.509709	0	0.281553	0.0679612	0.0558252	0	0	0	363	53417.4	1340.53	0	9.5	887.98	38.3
30	22-HOR1	AH	AH	mes	1.25	mu	CB	84	Wilkins Peak	sandstone	exterior		fluvial	CO-1	SE	out	uw	41.0958	-107.864	Hangout Ridge			Cathedral Bluffs Member							0.496386	0.33494	0.168675	0.0337349	0.0891566	0.516055	0	0.288991	0.0298165	0.0458716	0	0	0	363	83572.3	1581.95	0	7.98	921.95	39.01
38	17-OB-002	LG	HG	hgg	2.25	fu	CB	60	Wilkins Peak	sandstone	exterior		fluvial	WY	N	out	nau	42.2932	-108.87	Oregon Buttes			Cathedral Bluffs Member							0.70068	0.285714	0.0136054	0	0.0136054	0.495192	0	0.0817308	0.120192	0.293269	0	0	0	450	63711.1	1391.37	9.52	3.81	490.75	35.62
39	17-HB-003	LG	HG	hgg	1.25	mu	CB	51	Wilkins Peak	sandstone	exterior		fluvial	WY	N	out	nau	42.2245	-108.539	Honeycomb Buttes			Cathedral Bluffs Member							0.621118	0.285714	0.0931677	0	0.0745342	0.468182	0.177273	0.131818	0.0772727	0.05	0	0	0	450	57029.6	1865.31	0	6	693.33	39.38
40	19-LMe-384	LG		hgg	1.25	mu	T	54	Tipton	sandstone	exterior		fluvial	ID	NW	out	nau	42.3814	-110.214	Little Mesa			Wasatch Fm, Alkali Creek Tongue																				450	44688.2	1168.9	0	4.07	560.87	33.28
41	19-WM-371	LG	LG	HGG	2.75	fl	I	36	Wilkins Peak	sandstone	interior		fluvial	mix	C	in	nau	41.5898	-109.308	White Mountain			Wilkins Peak Member							0.365591	0.419355	0.215054	0	0.197849	0.315044	0.0230089	0.145133	0.2	0.0318584	0.0265487	0.0530973	0	1050	54696	1610	45	5	846	44
42	19-LM-405	LG	LG	lg	1.75	ml	I	22	Wilkins Peak	sandstone	periphery		fluvial	UT	C	in	nau	41.0771	-109.31	Little Mountain			Wilkins Peak Member							0.897727	0.0272727	0.075	0.00909091	0.0522727	0.830228	0.057971	0.0165631	0.00828157	0	0	0.0144928	0	129.24	18674	808	0		147	30
44	19-VC-395	LG	HG	hgg	1.25	mu	CB	39	Wilkins Peak	sandstone	exterior		fluvial	CO-1	SE	out	nau	40.8555	-108.503	Lookout Mountain			Cathedral Bluffs Member							0.41358	0.407407	0.179012	0	0.0185185	0.428571	0.165899	0.253456	0.0506912	0.078341	0	0.00921659	0	450	42256.6	1681.65	0	5.76	600.42	39.78
45	19-MR-400	LG		cam	2.25	fu	CB	23	Wilkins Peak	sandstone	exterior		fluvial	WM-2	SW	out	nau	41.2135	-110.6	Meyer Ridge			Wilkins Peak Member																				600	16318	1073	0		166	34
46	19-MR-383	LG	HG	cam	0.75	cl	CB	23	Wilkins Peak	sandstone	exterior		fluvial	WM-2	SW	out	nau	41.2157	-110.606	Meyer Ridge			Wilkins Peak Member							0.452991	0.145299	0.401709	0	0.119658	0.411483	0.430622	0.0574163	0.0239234	0.00478469	0	0	0	481.06	8878	779	0		270	31
47	17-BF-001	LG	HG	cam	1.75	ml	W	10	Wasatch	sandstone	interior		fluvial	ID	C	in	nau	41.3527	-109.334	Firehole Canyon			Wasatch main body							0.693252	0.226994	0.0797546	0	0.0613497	0.544601	0.0375587	0.0610329	0.112676	0.173709	0	0.0234742	0	600	38848	1160	89	5	600	37
48	19-CM-391	LG	HG	cam	1.25	mu	CB	46	Wilkins Peak	sandstone	exterior		fluvial	WY	N	out	nau	42.3053	-107.89	Crooks Mountain			Wilkins Peak Member							0.590361	0.39759	0.0120482	0	0	0.458716	0.238532	0.192661	0.110092	0	0	0	0	600	39419	1520	0		472	46
49	19-HR-392	LG	HG	cam	0.75	cl	CB	15	Wilkins Peak	sandstone	exterior		fluvial	CO-1	SE	out	nau	41.0868	-107.852	Hangout Road			Cathedral Bluffs Member							0.472393	0.392638	0.134969	0	0.0429448	0.389831	0.207627	0.207627	0.0635593	0.101695	0	0	0	600	34472	1384	0		630	48
50	TR-19-372	LG	HG	cam	2.75	fl	I	32	Wilkins Peak	sandstone	interior		fluvial	mix	C	in	nau	41.5424	-109.482	Tollgate Rock			Wilkins Peak Member							0.673611	0.270833	0.0555556	0	0.0555556	0.444954	0.0412844	0.12844	0.0504587	0.137615	0.0183486	0.110092	0	600	36671	1116	8	4	3518	62
51	19-DM-403	LG	HG	cam	2.25	fu	I	9	Wilkins Peak	sandstone	interior		fluvial	mix	C	in	nau	41.0724	-109.479	Deer Mound			Wilkins Peak Member							0.612717	0.32948	0.0578035	0	0.0578035	0.50237	0.0236967	0.118483	0.151659	0.0947867	0	0.00947867	0	600	45383	1193	13	4	445	39
52	19-HR-393	LG		cam	0.75	cl	CB	15	Wilkins Peak	sandstone	exterior		fluvial	CO-1	SE	out		41.0846	-107.955	Hangout Road			Cathedral Bluffs Member																				600	48830	1556	0		541	36
53	5-SC	EP	EP	cam	2.25	fu	G	27	Wilkins Peak	sandstone	interior		fluvial	mix	C	in	uw	41.2899	-109.4	Sage Creek			Wilkins Peak Member							0.434783	0.326087	0.23913	0.0478261	0.143478	0.388112	0.013986	0.0839161	0.178322	0.0769231	0	0.0034965	0	600	51287	1457	9	4	469	35
54	SC1	EP	EP	cam	2.75	fl	E	27	Wilkins Peak	sandstone	interior		fluvial	mix	C	in	uw	41.2899	-109.4	Sage Creek			Wilkins Peak Member							0.484848	0.441558	0.0735931	0.025974	0	0.412752	0.110738	0.0369128	0.305369	0.0805369	0	0.00671141	0	600	49581	1294	0		421	33
55	BC2	EP	EP	cam	2.25	fu	CB	41	Wilkins Peak	sandstone	exterior		fluvial	CO-1	SE	out	uw	41.1164	-108.56	Badger Creek			Cathedral Bluffs Member							0.483254	0.311005	0.205742	0.110048	0.00478469	0.402685	0.214765	0.181208	0.0369128	0.0604027	0	0	0	600	64688	2035	0		552	38
56	PL3	EP	EP	cam	3.25	vfu	I	26	Wilkins Peak	sandstone	periphery		fluvial	mix	C	in	uw	41.0339	-109.523	Canyon Road			Wilkins Peak Member							0.785714	0.107143	0.107143	0.00714286	0	0.478764	0.451737	0.0501931	0.00772201	0	0	0	0	600	10011	1283	0		220	38
57	LMRC2	EP	EP	cam	2.25	fu	B	20	Wilkins Peak	sandstone	periphery		fluvial	UT	C	in	uw	41.068	-109.285	Little Mountain			Cathedral Bluffs Member							0.755474	0.0328467	0.211679	0	0.131387	0.78157	0.0614334	0.0136519	0.0170648	0	0	0	0	600	18490	765	0		0
58	Syn7	EP	EP	cam	1.75	ml	CB	71	Wilkins Peak	sandstone	exterior		fluvial	UT	S	out	uw	41.0605	-108.913	Syncline_Center			Cathedral Bluffs Member							0.74477	0.142259	0.112971	0	0	0.729537	0.142349	0.0747331	0.0462633	0	0	0	0	600	22354	802	0		167	29
59	Syn3	EP	EP	cam	1.75	ml	CB	72	Wilkins Peak	sandstone	exterior		fluvial	CO-1	SE	out	uw	41.0773	-108.864	Syncline_South			Cathedral Bluffs Member							0.342857	0.55102	0.106122	0.0122449	0.0163265	0.345638	0.0671141	0.0805369	0.372483	0.104027	0	0.00335571	0	600	57836	1328	0		647	33
60	FH3	SH	EP+AH	cam	2.25	fu	D	10	Wilkins Peak	sandstone	interior		fluvial	mix	C	in	uw	41.3515	-109.413	Firehole Canyon			Wilkins Peak Member							0.538136	0.305085	0.15678	0.00423729	0.0211864	0.548611	0.135417	0.111111	0.138889	0.0243056	0	0	0	600	42002	1071	0		376	30
61	WM ALAN DZ 1	EP		holly	2.25	fu	T	61	Tipton	sandstone	interior		fluvial	ID	C	in	uw	41.8938	-109.263	Petroglyphs			Tipton Member																				450	22457	748	12	3	484	34
62	SB DZ 1b	SH	SH	HG	1.75	ml	Sand Butte	85	Laney	sandstone	interior		littoral	ID-3	C	in	uw	41.5433	-109.461	Wild Horse Canyon			Laney Member							0.0691358	0.197531	0.733333	0.432099	0.276543	0.0794979	0.0104603	0	0.167364	0.0271967	0	0.00209205	0	450	48149	1227	0	8	541	36
63	SB DZ 1a	SH	SH	HG	1.75	ml	Sand Butte	85	Laney	sandstone	interior		littoral	ID-3	C	in	uw	41.5433	-109.461	Wild Horse Canyon			Laney Member							0.0828402	0.295858	0.621302	0.352071	0.260355	0.0722611	0.00699301	0.013986	0.219114	0.025641	0	0.018648	0	450	36229	1068	0	8	280	30
64	PP DZ 1	SH	SH	HOLLY	1.25	mu	CB	50	Wilkins Peak	sandstone	exterior		fluvial	ID	NW	out	uw	43.1383	-110.211	Hoback area			Pass Peak Fm							0.353135	0.165017	0.481848	0.0231023	0.30363	0.325581	0.268499	0.0169133	0.0887949	0.0169133	0	0.0105708	0	450	30806	1319	0		438	36
65	LM DZ 1	SH	SH	HOLLY	1.75	ml	T	54	Tipton	sandstone	exterior		fluvial	ID	NW	out	uw	42.4023	-110.253	Little Mesa			Wasatch Fm, Alkali Creek Tongue							0.225131	0.301047	0.473822	0.0366492	0.387435	0.235955	0.011236	0.0853933	0.173034	0.0269663	0	0.00449438	0	450	19293	760	0		613	36
66	LM DZ 3	SH	SH	HOLLY	1.75	ml	T	54	Tipton	sandstone	exterior		fluvial	ID	NW	out	uw	42.4029	-110.251	Little Mesa			Wasatch Fm, Alkali Creek Tongue							0.354098	0.383607	0.262295	0.0163934	0.203279	0.288783	0.00954654	0.0883055	0.190931	0.0405728	0	0.00238663	0	450	27044	885	0		534	34
67	SC DZ 1	SH	SH	HOLLY	1.75	ml	T	68	Tipton	sandstone	exterior		fluvial	ID	SW	out	uw	41.8981	-110.401	Slate Creek			Wasatch Fm, Alkali Creek Tongue							0.307443	0.378641	0.313916	0.0161812	0.223301	0.317204	0.0268817	0.0672043	0.247312	0.0215054	0	0.0107527	0	450	28932	845	0		368	32
68	WAR DZ 2	SH	SH	HOLLY	2.75	fl	W	64	Wasatch	sandstone	exterior		fluvial	ID	NW	out	uw	42.479	-110.053	Reardon Draw			Wasatch main body							0.342629	0.310757	0.346614	0	0.278884	0.251834	0.00488998	0.0171149	0.173594	0.215159	0	0.00244499	0	450	19839	761	6	3	471	34
70	HOB DZ 1	SH	SH	HOLLY	1.25	mu	W	50	Wasatch	sandstone	exterior		fluvial	ID	NW	out	uw	43.2244	-110.358	Hoback area			Hoback Fm							0.16545	0.00729927	0.827251	0.0145985	0.695864	0.237219	0.0920245	0.00408998	0.00204499	0	0	0.00408998	0	450	18073	1343	5	3	503	39
71	RS DZ 1	SH	SH	HOLLY	1.75	ml	W	61	Wasatch	sandstone	interior		fluvial	ID	C	in	uw	41.9124	-109.256	Petroglyphs			Wasatch main body							0.345845	0.289544	0.364611	0.0375335	0.209115	0.408983	0.0070922	0.0070922	0.248227	0.0118203	0	0.0165485	0	450	15564	673	20	4	389	36
72	PIN DZ 1	SH	SH	HOLLY	1.25	mu	W	48	Wasatch	sandstone	exterior		fluvial	ID	NW	out	uw	42.8255	-110.04	Daniel			Wasatch Fm, Alkali Creek Tongue/Main Body							0.248521	0.325444	0.426036	0.00887574	0.340237	0.280612	0.00510204	0.102041	0.178571	0.0510204	0	0.00255102	0	450	40173	1132	28	4	553	34
73	PIN DZ 2	SH	SH	HOLLY	1.75	ml	W	48	Wasatch	sandstone	exterior		fluvial	ID	NW	out	uw	42.8258	-110.039	Daniel			Wasatch Fm, Alkali Creek Tongue/Main Body							0.393768	0.308782	0.29745	0.0283286	0.229462	0.345372	0.027088	0.0112867	0.234763	0.0383747	0	0.00225734	0	450	24547	883	0		546	33
74	RS DZ 2	SH	SH	HOLLY	1.25	mu	T	61	Tipton	sandstone	interior		fluvial	ID	C	in	uw	41.913	-109.259	Petroglyphs			Tipton Member							0.35514	0.401869	0.242991	0.00311526	0.168224	0.352185	0.00257069	0.092545	0.239075	0.0282776	0	0.0128535	0	450	30300	877	13	3	492	32
75	LM DZ 2	SH	SH	holly	2.25	fu	T	54	Tipton	sandstone	exterior		fluvial	ID	NW	out	uw	42.4028	-110.252	Little Mesa			Wasatch Fm, Alkali Creek Tongue							0.340176	0.422287	0.237537	0.0205279	0.181818	0.285714	0.0111607	0.0513393	0.270089	0.0691964	0	0.00446429	0	450	28432	825	0		464	33
76	WHC DZ 2	SH	SH	holly	1.75	ml	T	81	Tipton	sandstone	exterior		fluvial	WY	N	out	uw	42.2965	-108.874	White Horse Creek			Farson SS (Tipton Member, GRF)							0.336022	0.491935	0.172043	0	0.115591	0.359606	0.00985222	0.155172	0.295567	0.0197044	0	0	0	450	29868	798	24	4	457	33
77	WM DZ 2	SH	SH	holly	1.75	ml	W	61	Wasatch	sandstone	interior		fluvial	ID	C	in	uw	41.8911	-109.264	Petroglyphs			Wasatch main body							0.44186	0.262458	0.295681	0.00996678	0.209302	0.438202	0.0140449	0.0814607	0.140449	0.0308989	0	0.00561798	0	450	18011	655	5	3	420	32
78	WM DZ 1	SH	SH	holly	2.25	fu	W	61	Wasatch	sandstone	interior		fluvial	ID	C	in	uw	41.8894	-109.261	Petroglyphs			Wasatch main body							0.457055	0.251534	0.291411	0.00920245	0.199387	0.415094	0.00943396	0.0683962	0.125	0.0471698	0	0.00235849	0	450	23012	746	15	3	337	31
79	WAR DZ 1	SH	SH	holly	2.25	fu	W	65	Wasatch	sandstone	exterior		fluvial	ID	NW	out	uw	42.4937	-109.995	Reardon Draw			Wasatch main body							0.310559	0.385093	0.304348	0.0124224	0.236025	0.309711	0.0104987	0.0866142	0.238845	0.0288714	0	0.00524934	0	450	38427	995	0		358	29
80	WHC DZ 1	SH	SH	holly	1.75	ml	T	81	Tipton	sandstone	exterior		fluvial	WY	N	out	uw	42.2965	-108.871	White Horse Creek			Farson SS (Tipton Member, GRF)							0.353448	0.551724	0.0948276	0	0.045977	0.359897	0.0102828	0.131105	0.362468	0.0154242	0	0.00257069	0	450	43758	1095	13	3	258	26
81	NFT2	EP		cam	2.25	fu	CB	58	Wilkins Peak	sandstone	exterior		fluvial	WY	E	out	uw	41.2245	-107.809	North Flat-Top Mountain			Cathedral Bluffs Member																				600	34666	1595	6	3	332	36
83	20-157-SM	HG	HG	HGG	2.75	fl	I	31	Wilkins Peak	sandstone	interior		fluvial	mix	C	in		41.1552	-109.396	Sugarloaf Marsh			Wilkins Peak Member							0.670968	0.225806	0.103226	0	0.0645161	0.52381	0.0952381	0.0952381	0.0714286	0.0952381	0.047619	0.0142857	0	450	40328	1199	0		642	36
84	20-155-SM	HG	HG	HGG	2.25	fu	H	31	Wilkins Peak	sandstone	interior		fluvial	mix	C	in		41.1545	-109.396	Sugarloaf Marsh			Wilkins Peak Member							0.621622	0.27027	0.108108	0	0.0540541	0.473934	0.07109	0.104265	0.0853081	0.137441	0.042654	0.00947867	0	450	49773	1333	0		441	37
85	20-154-SM	HG	HG	HGG	5	vfl	H	31	Wilkins Peak	mudstone	interior		overbank	mix	C	in		41.1545	-109.396	Sugarloaf Marsh			Wilkins Peak Member							0.537975	0.291139	0.170886	0	0.139241	0.403587	0.0896861	0.139013	0.0672646	0.0896861	0.0627803	0.0179372	0	450	78537	1710	0		425	41
86	20-150-SM	HG	HG	HGG	3.25	vfu	F	31	Wilkins Peak	sandstone	interior		fluvial	mix	C	in		41.1541	-109.395	Sugarloaf Marsh			Wilkins Peak Member							0.658915	0.248062	0.0930233	0	0.0155039	0.378486	0.366534	0.123506	0.00398406	0.0557769	0.0159363	0.00398406	0	450	41878	1526	16	4	760	43
87	20-148-SM	HG	HG	HGG	2.25	fu	E	31	Wilkins Peak	sandstone	interior		fluvial	mix	C	in		41.1536	-109.394	Sugarloaf Marsh			Wilkins Peak Member							0.586826	0.263473	0.149701	0	0.0419162	0.53211	0.0458716	0.142202	0.059633	0.087156	0.0733945	0.00458716	0	450	50064	1269	16	4	543	35
88	20-146-SM	HG	HG	HGG	1.75	ml	D	31	Wilkins Peak	sandstone	interior		fluvial	mix	C	in		41.1507	-109.385	Sugarloaf Marsh			Wilkins Peak Member							0.537975	0.316456	0.14557	0	0.0189873	0.5	0.1	0.104762	0.133333	0.0714286	0.0666667	0	0	450	53963	1344	16	4	2116	47
89	20-100-CS	HG	HG	HGG	1.75	ml	A	6	Wilkins Peak	sandstone	interior		fluvial	mix	C	in		41.4084	-109.418	Chicken Springs			Wilkins Peak Member							0.639098	0.308271	0.0526316	0	0.0300752	0.407407	0.0833333	0.0925926	0.0972222	0.226852	0.037037	0	0	450	46734	1204	11	4	344	34
90	20-099-CS	HG	HG	HGG	1.25	mu	B	6	Wilkins Peak	sandstone	interior		fluvial	mix	C	in		41.4098	-109.417	Chicken Springs			Wilkins Peak Member							0.598592	0.302817	0.0985915	0	0.0633803	0.412844	0.105505	0.100917	0.0963303	0.183486	0.00917431	0	0	450	64659	1466	10	4	918	39
91	20-098-CS	HG	HG	HGG	3.25	vfu	C	6	Wilkins Peak	sandstone	interior		fluvial	mix	C	in		41.4114	-109.431	Chicken Springs			Wilkins Peak Member							0.509259	0.462963	0.0277778	0	0	0.266055	0.279817	0.165138	0.0642202	0.105505	0.0504587	0.00458716	0	450	70688	1785	9	4	503	41
92	20-097-CS	HG	HG	HGG	2.75	fl	D	6	Wilkins Peak	sandstone	interior		fluvial	mix	C	in		41.416	-109.435	Chicken Springs			Wilkins Peak Member							0.511111	0.422222	0.0666667	0	0.037037	0.331818	0.245455	0.113636	0.145455	0.0818182	0.0454545	0.0136364	0	450	48324	1454	18	4	1658	49
93	20-096-CS	HG	HG	HGG	2.75	fl	E	6	Wilkins Peak	sandstone	interior		fluvial	mix	C	in		41.417	-109.435	Chicken Springs			Wilkins Peak Member							0.520325	0.333333	0.146341	0	0.121951	0.313084	0.17757	0.0841121	0.107477	0.088785	0.0420561	0.0233645	0	450	65863	1728	7	4	684	42
94	20-095-CS	HG	HG	HGG	2.75	fl	F	6	Wilkins Peak	sandstone	interior		fluvial	mix	C	in		41.4174	-109.435	Chicken Springs			Wilkins Peak Member							0.607143	0.3125	0.0803571	0	0.0446429	0.344498	0.253589	0.0956938	0.0717703	0.110048	0.0574163	0	0	450	58919	1622	7	4	1231	46
95	20-094-CS	HG	HG	HGG	5	vfl	G	6	Wilkins Peak	mudstone	interior		overbank	mix	C	in		41.4211	-109.44	Chicken Springs			Wilkins Peak Member							0.504762	0.352381	0.142857	0	0.0761905	0.288462	0.163462	0.0528846	0.125	0.115385	0.0673077	0.00961539	0	450	70076	1735	10	5	1559	49
96	20-093-CS	HG	HG	HGG	3.25	vfu	H	6	Wilkins Peak	sandstone	interior		littoral	mix	C	in		41.4214	-109.44	Chicken Springs			Wilkins Peak Member							0.386364	0.545455	0.0681818	0	0.0681818	0.0825243	0.757282	0.0436893	0.0728155	0.00970874	0.00970874	0.00970874	0	450	28795	1862	7	4	641	46
97	20-091-CS	HG	HG	HGG	2.75	fl	I	6	Wilkins Peak	sandstone	interior		fluvial	mix	C	in		41.4226	-109.442	Chicken Springs			Wilkins Peak Member							0.426829	0.402439	0.170732	0	0.146341	0.286822	0.108527	0.0930233	0.162791	0.0736434	0.0503876	0.0503876	0	450	76253	1829	0		806	43
98	20-080-WP	HG	HG	fs	3.75	vfl	I	38	Wilkins Peak	sandstone	interior		fluvial	mix	C	in		41.5006	-109.394	Wilkins Peak			Wilkins Peak Member							0.793103	0.0948276	0.112069	0	0	0.475113	0.271493	0.0497738	0	0.0633484	0.0180995	0.0226244	0	450	58991	1479	9	4	483	38
99	20-079-wp	HG	HG	fs	5	vfl	H	38	Wilkins Peak	mudstone	interior		overbank	mix	C	in		41.4979	-109.396	Wilkins Peak			Wilkins Peak Member							0.714286	0.130952	0.154762	0	0.047619	0.345	0.085	0.055	0	0.1	0.03	0.03	0	450	72382	1760	21	5	504	40
100	20-076-WP	HG	HG	HGG	3.25	vfu	E	38	Wilkins Peak	sandstone	interior		fluvial	mix	C	in		41.4955	-109.406	Wilkins Peak			Wilkins Peak Member							0.627273	0.236364	0.136364	0	0.0454545	0.37799	0.349282	0.124402	0	0.0717703	0.0526316	0	0	450	49146	1378	0		1846	49
101	20-075-WP	HG	HG	HGG	2.75	fl	D	38	Wilkins Peak	sandstone	interior		fluvial	mix	C	in		41.4946	-109.409	Wilkins Peak			Wilkins Peak Member							0.62406	0.278195	0.0977444	0	0.0526316	0.42381	0.0714286	0.12381	0.052381	0.0809524	0.0619048	0.00952381	0	450	46334	1306	0		488	36
102	20-073-WP	HG	HG	HGG	1.75	ml	C	38	Wilkins Peak	sandstone	interior		fluvial	mix	C	in		41.4941	-109.41	Wilkins Peak			Wilkins Peak Member							0.7	0.3	0	0	0	0.101449	0.84058	0.0338164	0.00966184	0.00966184	0.00483092	0	0	450	35555	1848	0		363	44
103	20-072-WP	HG	HG	HGG	2.25	fu	B	38	Wilkins Peak	sandstone	interior		fluvial	mix	C	in		41.4881	-109.41	Wilkins Peak			Wilkins Peak Member							0.577236	0.178862	0.243902	0	0.121951	0.407583	0.104265	0.0521327	0.0521327	0.161137	0.0189573	0.0189573	0	450	51937	1402	0		1214	42
104	20-071-WP	HG	HG	HGG	2.25	fu	A	38	Wilkins Peak	sandstone	interior		fluvial	mix	C	in		41.4871	-109.409	Wilkins Peak			Wilkins Peak Member							0.239316	0	0.760684	0	0.717949	0.184358	0	0	0	0.00558659	0	0	0	450	31768	1613	0		660	47
105	20-068-WP	HG	HG	HGG	2.75	fl	G	38	Wilkins Peak	sandstone	interior		littoral	mix	C	in		41.494	-109.34	Wilkins Peak			Wilkins Peak Member							0.333333	0.666667	0	0	0	0.0380952	0.861905	0.0428571	0.0333333	0	0	0.0238095	0	450	17119	1717	0		564	48
106	20-067-WP	HG	HG	HGG	2.25	fu	F	38	Wilkins Peak	sandstone	interior		fluvial	mix	C	in		41.4906	-109.338	Wilkins Peak			Wilkins Peak Member							0.70922	0.191489	0.0992908	0	0.0780142	0.463964	0.243243	0.117117	0.0045045	0.0585586	0.0405405	0.00900901	0	450	46554	1328	14	4	514	36
107	20-060-KA	HG	HG	HGG	2.75	fl	I	19	Wilkins Peak	sandstone	interior		fluvial	mix	C	in		41.5451	-109.388	Kanda			Wilkins Peak Member							0.608974	0.339744	0.0512821	0	0.0320513	0.449541	0.12844	0.137615	0.105505	0.119266	0.00917431	0	0	450	51484	1306	0		591	36
108	20-059-KA	HG	HG	HGG	3.75	vfl	H	19	Wilkins Peak	sandstone	interior		fluvial	mix	C	in		41.5402	-109.388	Kanda			Wilkins Peak Member							0.387097	0.612903	0	0	0	0.109589	0.6621	0.0821918	0.0913242	0.0547945	0	0	0	450	33871	1817	11	4	692	48
109	20-058-KA	HG	HG	HGG	3.25	vfu	G	19	Wilkins Peak	sandstone	interior		littoral	mix	C	in		41.5399	-109.387	Kanda			Wilkins Peak Member							0.272727	0.727273	0	0	0	0.0731707	0.712195	0.0487805	0.146341	0.0146341	0.00487805	0	0	450	16885	1652	0		877	52
110	20-057-KA	HG	HG	HGG	3.75	vfl	F	19	Wilkins Peak	sandstone	interior		fluvial	mix	C	in		41.5387	-109.387	Kanda			Wilkins Peak Member							0.688073	0.266055	0.0458716	0	0.0366972	0.329004	0.337662	0.125541	0	0.121212	0.004329	0	0	450	65409	1846	10	4	483	41
111	20-056-KA	HG	HG	HGG	2.25	fu	E	19	Wilkins Peak	sandstone	interior		fluvial	mix	C	in		41.5384	-109.387	Kanda			Wilkins Peak Member							0.519481	0.480519	0	0	0	0.188679	0.580189	0.0518868	0.122642	0.0518868	0.00471698	0	0	450	42823	1897	0		505	44
112	20-055-KA	HG	HG	HGG	3.25	vfu	D	19	Wilkins Peak	sandstone	interior		fluvial	mix	C	in		41.5382	-109.387	Kanda			Wilkins Peak Member							0.483607	0.5	0.0163934	0	0	0.293269	0.1875	0.163462	0.129808	0.201923	0.0240385	0	0	450	62180	1577	12	4	425	38
113	20-054-KA	HG	HG	HGG	2.75	fl	C	19	Wilkins Peak	sandstone	interior		fluvial	mix	C	in		41.5374	-109.388	Kanda			Wilkins Peak Member							0.76087	0.23913	0	0	0	0.321101	0.527523	0.059633	0.0412844	0.0504587	0	0	0	450	36162	1706	14	4	463	41
114	20-053-KA	HG	HG	HGG	3.25	vfu	B	19	Wilkins Peak	sandstone	interior		fluvial	mix	C	in		41.5365	-109.388	Kanda			Wilkins Peak Member							0.71875	0.225	0.05625	0	0.04375	0.565217	0.00966184	0.140097	0.0338164	0.169082	0.0434783	0	0	450	51408	1245	19	4	1684	44
115	20-052-KA	HG	HG	HGG	3.25	vfu	A	19	Wilkins Peak	sandstone	interior		fluvial	mix	C	in		41.5355	-109.389	Kanda			Wilkins Peak Member							0.684932	0.273973	0.0410959	0	0.0342466	0.448889	0.146667	0.142222	0.0355556	0.164444	0.0311111	0	0	450	55595	1407	0		1707	47
116	20-043-FC	HG	HG	HGG	2.25	fu	I	10	Wilkins Peak	sandstone	interior		fluvial	mix	C	in		41.353	-109.43	Firehole Canyon			Wilkins Peak Member							0.57047	0.348993	0.0805369	0	0.0805369	0.400943	0.0943396	0.136792	0.108491	0.113208	0.0424528	0.00471698	0	450	42654	1266	10	4	359	37
117	20-042-FC	HG	HG	HGG	2.25	fu	H	10	Wilkins Peak	sandstone	interior		fluvial	mix	C	in		41.35	-109.429	Firehole Canyon			Wilkins Peak Member							0.650307	0.214724	0.134969	0	0.116564	0.5	0.119266	0.0963303	0.0642202	0.087156	0.0366972	0.00917431	0	450	55001	1348	0		1284	42
118	20-040-FC	HG	HG	HGG	2.25	fu	G	10	Wilkins Peak	sandstone	interior		fluvial	mix	C	in		41.3494	-109.43	Firehole Canyon			Wilkins Peak Member							0.630252	0.319328	0.0504202	0	0.0504202	0.348837	0.381395	0.0930233	0.0837209	0.0465116	0.0186047	0	0	450	71941	1801	0		453	39
119	20-018-FC	HG	HG	HGG	5	vfl	E	10	Wilkins Peak	mudstone	interior		overbank	mix	C	in		41.3444	-109.388	Firehole Canyon			Wilkins Peak Member							0.691781	0.246575	0.0616438	0	0.0547945	0.495146	0.135922	0.121359	0.0533981	0.0728155	0.0485437	0.00485437	0	450	86352	1800	9	4	579	41
120	20-017-FC	HG	HG	HGG	1.75	ml	D	10	Wilkins Peak	sandstone	interior		fluvial	mix	C	in		41.3448	-109.387	Firehole Canyon			Wilkins Peak Member							0.545455	0.415584	0.038961	0	0.038961	0.376682	0.107623	0.0986547	0.188341	0.170404	0.0179372	0.00448431	0	450	58850	1408	12	4	322	34
121	20-015-FC	HG	HG	HGG	2.25	fu	C	10	Wilkins Peak	sandstone	interior		fluvial	mix	C	in		41.3475	-109.382	Firehole Canyon			Wilkins Peak Member							0.629371	0.265734	0.104895	0	0.0979021	0.439614	0.15942	0.135266	0.0483092	0.0724638	0.0193237	0.00483092	0	450	44997	1162	0		664	35
122	20-013-FC	HG	HG	HGG	1.75	ml	B	10	Wilkins Peak	sandstone	interior		fluvial	mix	C	in		41.3463	-109.384	Firehole Canyon			Wilkins Peak Member							0.714286	0.194805	0.0909091	0	0.0584416	0.518018	0.157658	0.0990991	0.036036	0.0810811	0.018018	0.0135135	0	450	67142	1552	17	5	418	37
123	20-005-FC	HG	HG	HGG	1.75	ml	A	10	Wilkins Peak	sandstone	interior		fluvial	mix	C	in		41.3491	-109.378	Firehole Canyon			Wilkins Peak Member							0.68	0.226667	0.0933333	0	0.06	0.511962	0.0861244	0.124402	0.0382775	0.177033	0.0191388	0	0	450	61356	1551	0		659	39
124	18-GD-HS	LG	LG	lg	2.5	fine	I	12	Wilkins Peak	sandstone	interior		fluvial	mix	C	in		41.2755	-109.435	Greasewood Draw	8	m	Wilkins Peak Member		15					0.394928	0.333333	0.271739	0	0.264493	0.356913	0.0289389	0.0418006	0.254019	0.0418006	0.0321543	0.00321543	0	122.44	81150	1790	0	20	860	40
125	CS-18-034	LG	LG	lg	3.25	vfu	I	7	Wilkins Peak	sandstone	interior		overbank	mix	C	in		41.4151	-109.464	Chicken Springs Draw	16.5	m	Wilkins Peak Member		19					0.391892	0.436937	0.171171	0	0.162162	0.303754	0.0238908	0.0375427	0.293515	0.0170648	0.0375427	0.0204778	0	121.36	81510	1810	0	20	1400	40
126	18-PB-341	LG	LG	lg	3.25	vfu	I	25	Wilkins Peak	sandstone	periphery		fluvial	mix	C	in		41.0367	-109.558	Pipeline West	1		Wilkins Peak Member		30					0.56875	0.20625	0.225	0	0.225	0.294498	0.401294	0.02589	0.0809061	0.00970874	0	0.0161812	0	123	47170	1720	0	20	500	40
127	18-PB-347	LG	LG	lg	3.25	vfu	I	25	Wilkins Peak	sandstone	periphery		fluvial	mix	C	in		41.0367	-109.558	Pipeline West	4		Wilkins Peak Member		30					0.524229	0.132159	0.343612	0	0.325991	0.376147	0.278287	0.0183486	0.0733945	0.00917431	0	0.00611621	0	121.52	34150	1570	0	20	360	40
128	18-FC-304	LG	LG	lg	2.75	fl	I	11	Wilkins Peak	sandstone	interior		fluvial	mix	C	in		41.3421	-109.436	Firehole Canyon L	5	m	Wilkins Peak Member		14					0.227273	0.443182	0.329545	0	0.329545	0.13468	0	0.020202	0.242424	0.013468	0.040404	0.037037	0	122.13	48620	1350	0	20	980	40
129	18-FC-307	LG	LG	lg	3.25	vfu	I	11	Wilkins Peak	sandstone	interior		overbank	mix	C	in		41.3421	-109.436	Firehole Canyon L	6.5	m	Wilkins Peak Member		17					0.354701	0.393162	0.252137	0	0.252137	0.265176	0	0.0159744	0.277955	0.0479233	0.0383387	0.0223642	0	121.31	46650	1390	0	20	590	40
130	18-WD-247	LG	LG	lg	0.75	cl	I	37	Wilkins Peak	sandstone	periphery		fluvial	mix	C	in		41.055	-109.497	Wildhorse Draw	1.5		Wilkins Peak Member		28					0.695946	0.027027	0.277027	0	0.22973	0.398551	0.431159	0.00724638	0.00724638	0	0	0.00724638	0	123.25	21580	1390	0	20	290	50
131	18-WD-265	LG	LG	lg	0.75	cl	I	37	Wilkins Peak	sandstone	periphery		fluvial	mix	C	in		41.055	-109.497	Wildhorse Draw	10.5		Wilkins Peak Member		30					0.828571	0.00952381	0.161905	0	0.0857143	0.344203	0.594203	0	0.00362319	0	0	0.0108696	0	121.68	59100	2190	0	20	330	40
132	18-IM-228	LG	LG	lg	1.75	ml	I	16	Wilkins Peak	sandstone	periphery		fluvial	mix	C	in		41.0458	-109.443	Iron Mountain	4.5		Wilkins Peak Member		30					0.796407	0.0479042	0.155689	0	0.107784	0.542308	0.330769	0.0153846	0.0153846	0	0.00769231	0.0115385	0	121.3	18350	1560	0	20	320	50
133	18-IM-235	LG	LG	lg	1.25	mu	I	16	Wilkins Peak	sandstone	periphery		fluvial	mix	C	in		41.0458	-109.443	Iron Mountain	8		Wilkins Peak Member		30					0.812121	0.0363636	0.151515	0	0.121212	0.542969	0.304688	0.0117188	0.0117188	0	0	0.00390625	0	121.98	12640	920	0	20	160	40
134	18-SKP2-214	LG	LG	lg	2.25	fu	I	67	Wilkins Peak	sandstone	interior		littoral	mix	C	in		41.0723	-109.478	Sand Knoll	4		Wilkins Peak Member		1					0.573604	0.172589	0.253807	0	0.243655	0.471311	0.0983607	0.0204918	0.118852	0	0.00409836	0.00409836	0	121.95	29860	1140	0	20	410	40
135	18-SKP2-215	LG	LG	lg	2.75	fl	I	67	Wilkins Peak	sandstone	interior		littoral	mix	C	in		41.0723	-109.478	Sand Knoll	6		Wilkins Peak Member		12					0.294118	0.309804	0.396078	0	0.392157	0.246753	0.00649351	0.0649351	0.191558	0.0941558	0.00974026	0.0194805	0	123.22	44500	1910	20	10	710	40
136	18-332	LG	LG	lg	2.75	fl	I	11	Wilkins Peak	sandstone	interior		fluvial	mix	C	in		41.3202	-109.48	Firehole Canyon L			Wilkins Peak Member							0.381743	0.373444	0.244813	0	0.240664	0.307947	0.0198676	0.0463576	0.251656	0.0331126	0.0397351	0.00331126	0	125	30284	1112	0	12	1193	64
137	18-335	LG	LG	lg	3.25	vfu	I	13	Wilkins Peak	sandstone	interior		fluvial	mix	C	in		41.2844	-109.457	Greasewood Draw			Wilkins Peak Member							0.253061	0.4	0.346939	0	0.342857	0.198113	0.0157233	0.0628931	0.245283	0.0125786	0.0345912	0.00943396	0	125	74413	1759	0	8	575	37
138	18-337	LG	LG	lg	2.25	fu	I	24	Wilkins Peak	sandstone	interior		fluvial	mix	C	in		41.1154	-109.41	Middle Marsh			Wilkins Peak Member							0.396887	0.389105	0.214008	0	0.210117	0.351536	0	0.0716724	0.269625	0.0204778	0.0102389	0.0170648	0	125	53462	1278	0	10	476	35
139	18-338	LG	LG	lg	3.25	vfu	I	24	Wilkins Peak	sandstone	interior		fluvial	mix	C	in		41.1154	-109.41	Middle Marsh			Wilkins Peak Member							0.359833	0.368201	0.271967	0	0.271967	0.287625	0.0167224	0.0468227	0.247492	0.00668896	0.0267559	0.0200669	0	125	45221	1303	0	10	555	47
140	18-333	LG	LG	lg	2.25	fu	I	11	Wilkins Peak	sandstone	interior		fluvial	mix	C	in		41.3202	-109.46	Firehole Canyon L			Wilkins Peak Member							0.440476	0.373016	0.186508	0	0.162698	0.400685	0.0171233	0.0136986	0.308219	0.0205479	0.0205479	0.00342466	0	123.11	35418	1184	0		1511	63
141	18-334	LG	LG	lg	2.25	fu	I	11	Wilkins Peak	sandstone	interior		fluvial	mix	C	in		41.3202	-109.46	Firehole Canyon L			Wilkins Peak Member							0.441441	0.490991	0.0675676	0	0.0585586	0.346021	0.100346	0.0242215	0.352941	0.0553633	0.017301	0.00692042	0	135.08	60413	2115	34	8	706	51
142	19-DM-404	LG	LG	lg	1.25	mu	I	9	Wilkins Peak	sandstone	interior		fluvial	mix	C	in		41.0696	-109.472	Deer Mound			Wilkins Peak Member							0.851429	0.0628571	0.0857143	0	0.0342857	0.566308	0.261649	0.0215054	0.0179211	0	0	0.00358423	0	124.16	27440	1135	0		251	35
143	19-WD-397	LG	LG	lg	2.25	fu	I	37	Wilkins Peak	sandstone	periphery		fluvial	mix	C	in		41.0498	-109.494	Wildhorse Draw			Wilkins Peak Member							0.909639	0.0481928	0.0421687	0.0060241	0.0120482	0.545775	0.390845	0.00352113	0.0246479	0	0	0	0	126.19	13206	1041	0		251	37
144	19-IM-399	LG	LG	lg	0.75	cl	I	16	Wilkins Peak	sandstone	periphery		fluvial	mix	C	in		41.0509	-109.451	Iron Mountain			Wilkins Peak Member							0.897196	0.0654206	0.0373832	0	0.0280374	0.740458	0.167939	0.00763359	0.0458015	0.00381679	0	0	0	123.76	23529	1100	0		244	36
145	19-SM-402	LG	LG	lg	2.25	fu	I	31	Wilkins Peak	sandstone	interior		fluvial	mix	C	in		41.1629	-109.435	Sugarloaf March			Wilkins Peak Member							0.486056	0.414343	0.0996016	0	0.0996016	0.429577	0.0140845	0.0105634	0.355634	0.0316901	0.0352113	0.0105634	0	122.39	45905	1256	0		503	45
146	19-TR-376	LG	LG	lg	2.25	fu	I	32	Wilkins Peak	sandstone	interior		fluvial	mix	C	in		41.5424	-109.482	Tollgate Rock			Wilkins Peak Member							0.423581	0.436681	0.139738	0	0.126638	0.334448	0.090301	0.0334448	0.301003	0.0301003	0.0367893	0.0167224	0	123.89	48582	1385	31	6	1019	40
147	19-PB-382	LG		cam	2.75	fl	I	25	Wilkins Peak	sandstone	periphery		fluvial	mix	C	in		41.0367	-109.558	Pipeline West			Wilkins Peak Member																				600	39724	1403	15	4	452	36
148	19-VC-394	LG		cam	1.75	ml	CB	33	Wilkins Peak	sandstone	exterior		fluvial	CO-1	SE	out		40.8325	-108.589	Vermillion Bluff			Cathedral Bluffs Member																				600	67049	1839	0		356	37
150	19-GD-401	LG		cam	0.75	cl	I	12	Wilkins Peak	sandstone	interior		fluvial	mix	C	in		41.2755	-109.435	Greasewood Draw			Wilkins Peak Member																				600	44781	1174	0		454	36
151	19-IM-398	LG		cam	1.25	mu	I	17	Wilkins Peak	sandstone	periphery		fluvial	mix	C	in		41.0458	-109.443	Iron Mountain			Wilkins Peak Member																				1050	15549	974	0		161	34
242	03-PB-277	MES	MES		1.5	medium	D	18	Wilkins Peak	sandstone	periphery		fluvial	mix	C	in		41.0233	-109.562	Pipeline										0.867679	0.0195228	0.112798	0	0.0498915	0.877301	0.0408998	0	0.0184049	0	0	0.00204499	0.0224949
439		LG		lg	4			9	Wilkins Peak	carbonate	interior		palustrine	mix	C	in		41.0724	-109.479	Deer Mound	0		Wilkins Peak Member		1	8.7	1.6	4.9	11														123.11	21030	1170	0	20	660	70
440		LG		lg	4			9	Wilkins Peak	carbonate	interior		palustrine	mix	C	in		41.0724	-109.479	Deer Mound	0.5		Wilkins Peak Member		1	9.3	1.9	5	9.4														123.47	40110	2120	0	20	910	50
441		LG		lg	4			9	Wilkins Peak	carbonate	interior		palustrine	mix	C	in		41.0724	-109.479	Deer Mound	1		Wilkins Peak Member		1	8.9	1.8	5.6	8.1														122.59	45220	1910	0	20	620	60
442		LG		lg	4			9	Wilkins Peak	carbonate	interior		palustrine	mix	C	in		41.0724	-109.479	Deer Mound	1.5		Wilkins Peak Member		1	10.4	2.2	6.2	8.8														122.9	10580	1260	0	20	1050	100
443		LG		lg	5			9	Wilkins Peak	carbonate	interior		profundal	mix	C	in		41.0724	-109.479	Deer Mound	2		Wilkins Peak Member		13	11.1	2.3	6	10.6														121.8	53140	2130	0	20	610	40
444		LG		lg	5			9	Wilkins Peak	carbonate	interior		profundal	mix	C	in		41.0724	-109.479	Deer Mound	2.5		Wilkins Peak Member		13	11.7	1.8	7	13.4														122.24	21250	1330	0	20	840	70
445		LG		lg	4			9	Wilkins Peak	carbonate	interior		palustrine	mix	C	in		41.0724	-109.479	Deer Mound	3		Wilkins Peak Member		1	13.4	2.1	8.7	14.1														121.51	64410	2050	40	10	380	40
446		LG		lg	3			9	Wilkins Peak	tuff	interior		tuff	mix	C	in		41.0724	-109.479	Deer Mound	3.5		Wilkins Peak Member			11.4	1.7	5.8	14.5														122.76	23510	1390	0	20	520	60
447		LG		lg	3	f	I	9	Wilkins Peak	sandstone	interior		overbank	mix	C	in		41.0724	-109.479	Deer Mound	4		Wilkins Peak Member		17	9.1	2.1	3.8	10.8														122.32	27030	1100	30	10	250	40
448		LG		lg	3	f	I	9	Wilkins Peak	sandstone	interior		overbank	mix	C	in		41.0724	-109.479	Deer Mound	4.5		Wilkins Peak Member		17	11.9	3.3	5.2	12.5														121.52	62160	1640	0	20	630	60
449		LG		lg	5		I	9	Wilkins Peak	mudstone	interior		overbank	mix	C	in		41.0724	-109.479	Deer Mound	5		Wilkins Peak Member		18	17.8	4.9	6.5	18.8														121.09	43870	1290	0	20	560	50
450		LG		lg	5		I	9	Wilkins Peak	mudstone	interior		overbank	mix	C	in		41.0724	-109.479	Deer Mound	5.5		Wilkins Peak Member		18	15.4	4	6.2	13.2														120.88	52660	1680	0	20	520	50
451		LG		lg	-0.5	vc	I	9	Wilkins Peak	sandstone	interior		fluvial	mix	C	in		41.0724	-109.479	Deer Mound	6		Wilkins Peak Member		14	15.7	4.4	5	16.3														151.36	58900	1410	0	20	620	40
452		LG		lg	-0.5	vc	I	9	Wilkins Peak	sandstone	interior		fluvial	mix	C	in		41.0724	-109.479	Deer Mound	6.5		Wilkins Peak Member		14	19.1	4.2	7.8	23														122.33	52610	1420	0	20	690	50
453		LG		lg	0.5	c	I	9	Wilkins Peak	sandstone	interior		fluvial	mix	C	in		41.0724	-109.479	Deer Mound	7		Wilkins Peak Member		14	14.7	3.3	6.2	16.2														128.53	59720	1320	0	20	520	40
454		LG		lg	0.5	c	I	9	Wilkins Peak	sandstone	interior		fluvial	mix	C	in		41.0724	-109.479	Deer Mound	7.5		Wilkins Peak Member		14	15	3.6	5.2	17.5														123.12	67580	1540	0	20	640	40
455		LG		lg	1.5	m	I	9	Wilkins Peak	sandstone	interior		fluvial	mix	C	in		41.0724	-109.479	Deer Mound	8		Wilkins Peak Member		14	14.9	3.5	5.1	18.3														122.42	40590	1160	20	10	630	50
456		LG		lg	1.5	m	I	9	Wilkins Peak	sandstone	interior		fluvial	mix	C	in		41.0724	-109.479	Deer Mound	8.5		Wilkins Peak Member		14	14.4	3.6	7.1	16														121.33	37760	1260	0	20	600	60
457		LG		lg	1.5	m	I	9	Wilkins Peak	sandstone	interior		fluvial	mix	C	in		41.0724	-109.479	Deer Mound	9		Wilkins Peak Member		14	11.5	2.5	4.4	17.3														121.34	62960	1600	0	20	700	50
458		LG		lg	1.5	m	I	9	Wilkins Peak	sandstone	interior		fluvial	mix	C	in		41.0724	-109.479	Deer Mound	9.5		Wilkins Peak Member		15	11.6	2.7	4.7	16														123.79	29920	930	0	20	510	40
459		LG		lg	2.5	f	I	9	Wilkins Peak	sandstone	interior		fluvial	mix	C	in		41.0724	-109.479	Deer Mound	10		Wilkins Peak Member		15	12	3.1	4.3	12.8														122.43	74420	1670	0	20	340	30
460		LG		lg	2.5	f	I	9	Wilkins Peak	sandstone	interior		fluvial	mix	C	in		41.0724	-109.479	Deer Mound	10.5		Wilkins Peak Member		15	12	3	3.6	15.1														122.99	59040	1500	0	20	630	40
461		LG		lg	5		I	9	Wilkins Peak	mudstone	interior		overbank	mix	C	in		41.0724	-109.479	Deer Mound	11		Wilkins Peak Member		18	10.3	3.1	4.2	8.7														123.1	63660	2270	30	10	530	50
462		LG		lg	4			9	Wilkins Peak	carbonate	interior		palustrine	mix	C	in		41.0724	-109.479	Deer Mound	11.5		Wilkins Peak Member		1	10.9	2.5	3.9	13.6														123.95	31610	1410	0	20	410	40
463		LG		lg	4			9	Wilkins Peak	carbonate	interior		palustrine	mix	C	in		41.0724	-109.479	Deer Mound	12		Wilkins Peak Member		3	9.5	2.1	4.4	10.4														124.02	254510	3720	0	20	890	90
464		LG		lg	4			9	Wilkins Peak	carbonate	interior		palustrine	mix	C	in		41.0724	-109.479	Deer Mound	12.5		Wilkins Peak Member		1	11.7	1.9	4.4	18.9														122.75	16230	920	0	20	360	40
465		LG		lg	3			9	Wilkins Peak	carbonate	interior		littoral	mix	C	in		41.0724	-109.479	Deer Mound	13		Wilkins Peak Member		8	7.6	1.1	3.6	10.2														122.85	13660	950	0	20	380	40
466		LG		lg	4			9	Wilkins Peak	carbonate	interior		palustrine	mix	C	in		41.0724	-109.479	Deer Mound	13.5		Wilkins Peak Member		1	7.3	1.5	4.7	7.2														122.87	68260	2530	0	20	620	40
467		LG		lg	4			9	Wilkins Peak	carbonate	interior		palustrine	mix	C	in		41.0724	-109.479	Deer Mound	14		Wilkins Peak Member		1	10.7	1.4	7.9	12.5														123.33	41710	1820	0	20	740	50
468		LG		lg	3			9	Wilkins Peak	carbonate	interior		littoral	mix	C	in		41.0724	-109.479	Deer Mound	14.5		Wilkins Peak Member		8	7.1	1.5	3	8.1														153.49	41650	1530	20	10	380	40
469		LG		lg	4			9	Wilkins Peak	carbonate	interior		palustrine	mix	C	in		41.0724	-109.479	Deer Mound	15		Wilkins Peak Member		1	9.2	1.2	8.1	5.1														122.57	55980	1770	30	10	540	40
470		LG		lg	5			7	Wilkins Peak	carbonate	interior		profundal	mix	C	in		41.4151	-109.464	Chicken Springs Draw	0		Wilkins Peak Member		12	9.7	4.1	2.9	5.5														143.14	88860	2670	0	20	420	40
471		LG		lg	5			7	Wilkins Peak	carbonate	interior		profundal	mix	C	in		41.4151	-109.464	Chicken Springs Draw	0.5		Wilkins Peak Member		12	6.9	2.9	1.8	2.7														124.39	48080	1620	0	20	740	40
472		LG		lg	5			7	Wilkins Peak	carbonate	interior		profundal	mix	C	in		41.4151	-109.464	Chicken Springs Draw	1		Wilkins Peak Member		12	5.5	1.8	2.1	3.8														122.84	17270	1250	0	20	210	40
473		LG		lg	4			7	Wilkins Peak	carbonate	interior		palustrine	mix	C	in		41.4151	-109.464	Chicken Springs Draw	1.5		Wilkins Peak Member		1	7.9	2.1	4.3	6.8														123.56	52710	1680	0	20	460	40
474		LG		lg	4			7	Wilkins Peak	carbonate	interior		palustrine	mix	C	in		41.4151	-109.464	Chicken Springs Draw	2		Wilkins Peak Member		1	9.1	2.1	4.3	8.1														122.45	39760	1930	0	20	290	40
475		LG		lg	3			7	Wilkins Peak	tuff	interior		tuff	mix	C	in		41.4151	-109.464	Chicken Springs Draw	2.5		Wilkins Peak Member			9.9	4.3	2.3	2.6														122.72	45100	1270	60	10	930	40
476		LG		lg	3			7	Wilkins Peak	carbonate	interior		littoral	mix	C	in		41.4151	-109.464	Chicken Springs Draw	3		Wilkins Peak Member		8	11	5.2	1.5	4.6														123.08	28320	1940	0	20	200	50
477		LG		lg	5			7	Wilkins Peak	carbonate	interior		profundal	mix	C	in		41.4151	-109.464	Chicken Springs Draw	3.5		Wilkins Peak Member		13	5	1.3	2.3	3.7														122.33	27700	1390	0	20	430	40
478		LG		lg	5			7	Wilkins Peak	carbonate	interior		profundal	mix	C	in		41.4151	-109.464	Chicken Springs Draw	4		Wilkins Peak Member		12	5.5	1.7	1.9	3.8														122.26	63940	2200	0	20	370	40
479		LG		lg	5			7	Wilkins Peak	carbonate	interior		profundal	mix	C	in		41.4151	-109.464	Chicken Springs Draw	4.5		Wilkins Peak Member		12	7.3	1.7	5.7	5.7														122.06	12670	1370	0	20	420	40
480		LG		lg	5			7	Wilkins Peak	carbonate	interior		profundal	mix	C	in		41.4151	-109.464	Chicken Springs Draw	5		Wilkins Peak Member		12	7.2	1.9	4.3	4														197.3	27030	1760	0	20	520	40
481		LG		lg	5			7	Wilkins Peak	carbonate	interior		profundal	mix	C	in		41.4151	-109.464	Chicken Springs Draw	5.5		Wilkins Peak Member		12	5.9	1.2	5.1	2.6														142.15	18990	1120	0	20	250	30
482		LG		lg	4			7	Wilkins Peak	carbonate	interior		palustrine	mix	C	in		41.4151	-109.464	Chicken Springs Draw	6		Wilkins Peak Member		3	6.7	2	3.2	4.5														121.27	94370	3410	0	20	390	40
483		LG		lg	4			7	Wilkins Peak	carbonate	interior		palustrine	mix	C	in		41.4151	-109.464	Chicken Springs Draw	6.5		Wilkins Peak Member		1	9.8	3.8	3.2	4.1														137.28	43840	1660	0	20	320	40
484		LG		lg	4			7	Wilkins Peak	carbonate	interior		palustrine	mix	C	in		41.4151	-109.464	Chicken Springs Draw	7		Wilkins Peak Member		1	12.9	2.7	9	8.1														123.72	41220	1590	20	10	1330	50
485		LG		lg	4			7	Wilkins Peak	carbonate	interior		palustrine	mix	C	in		41.4151	-109.464	Chicken Springs Draw	7.5		Wilkins Peak Member		1	8.1	3.1	3.8	5.3														121.23	33510	1410	0	20	370	40
486		LG		lg	4			7	Wilkins Peak	carbonate	interior		palustrine	mix	C	in		41.4151	-109.464	Chicken Springs Draw	8		Wilkins Peak Member		1	7.3	1.8	4.9	6.6														139.53	40820	1570	0	20	430	40
487		LG		lg	5			7	Wilkins Peak	carbonate	interior		profundal	mix	C	in		41.4151	-109.464	Chicken Springs Draw	8.5		Wilkins Peak Member		12	6.7	2.4	2.1	3.4														126.06	23010	1590	20	10	420	60
488		LG		lg	5			7	Wilkins Peak	carbonate	interior		profundal	mix	C	in		41.4151	-109.464	Chicken Springs Draw	9		Wilkins Peak Member		13	7.8	2.5	3.1	4.1														121.94	19010	1250	20	10	470	40
489		LG		lg	3			7	Wilkins Peak	carbonate	interior		littoral	mix	C	in		41.4151	-109.464	Chicken Springs Draw	9.5		Wilkins Peak Member		5	7.3	2	3.4	6														121.48	20990	1570	30	10	750	50
490		LG		lg	3			7	Wilkins Peak	carbonate	interior		littoral	mix	C	in		41.4151	-109.464	Chicken Springs Draw	10		Wilkins Peak Member		5	8.7	3.2	1.7	6														122.26	41180	1520	20	10	910	40
491		LG		lg	5		I	7	Wilkins Peak	mudstone	interior		overbank	mix	C	in		41.4151	-109.464	Chicken Springs Draw	10.5		Wilkins Peak Member		18	17.8	2.5	12.4	14.9														121.95	71580	2340	0	20	380	40
492		LG		lg	5		I	7	Wilkins Peak	mudstone	interior		overbank	mix	C	in		41.4151	-109.464	Chicken Springs Draw	11		Wilkins Peak Member		18	19.2	2.3	11.3	21.3														130.48	77170	2510	0	20	1420	50
493		LG		lg	5		I	7	Wilkins Peak	mudstone	interior		overbank	mix	C	in		41.4151	-109.464	Chicken Springs Draw	11.5		Wilkins Peak Member		18	29	2.6	8.1	63.7														122.82	63310	2220	0	20	470	40
494		LG		lg	5		I	7	Wilkins Peak	mudstone	interior		overbank	mix	C	in		41.4151	-109.464	Chicken Springs Draw	12		Wilkins Peak Member		19	10.2	2.7	2.4	14.5														122.65	64650	2040	0	20	460	40
495		LG		lg	5		I	7	Wilkins Peak	mudstone	interior		overbank	mix	C	in		41.4151	-109.464	Chicken Springs Draw	12.5		Wilkins Peak Member		18	7.7	2.9	2	3.9														121.7	103240	2810	20	10	510	40
496		LG		lg	5		I	7	Wilkins Peak	mudstone	interior		overbank	mix	C	in		41.4151	-109.464	Chicken Springs Draw	13		Wilkins Peak Member		18	8.6	4	1.8	3.5														121.79	75060	2140	0	20	440	40
497		LG		lg	2.5	f	I	7	Wilkins Peak	sandstone	interior		fluvial	mix	C	in		41.4151	-109.464	Chicken Springs Draw	13.5		Wilkins Peak Member		14	7	3	1.3	4.4														121.11	54270	1660	0	20	1450	40
498		LG		lg	2.5	f	I	7	Wilkins Peak	sandstone	interior		overbank	mix	C	in		41.4151	-109.464	Chicken Springs Draw	14		Wilkins Peak Member		20	8.7	4.1	2.1	3.4														122.08	125320	2560	0	20	680	40
499		LG		lg	5		I	7	Wilkins Peak	mudstone	interior		overbank	mix	C	in		41.4151	-109.464	Chicken Springs Draw	14.5		Wilkins Peak Member		19	8.3	3.7	1.7	3														121.78	66710	2120	0	20	520	40
500		LG		lg	2.5	f	I	7	Wilkins Peak	sandstone	interior		overbank	mix	C	in		41.4151	-109.464	Chicken Springs Draw	15		Wilkins Peak Member		20	7.4	3.3	1.1	3.8														120.82	82390	2060	0	20	1220	40
501		LG		lg	5		I	7	Wilkins Peak	mudstone	interior		overbank	mix	C	in		41.4151	-109.464	Chicken Springs Draw	15.5		Wilkins Peak Member		19	8.4	4.1	2.1	3.8														121.33	90000	2350	0	20	560	40
502		LG		lg	3		I	7	Wilkins Peak	sandstone	interior		fluvial	mix	C	in		41.4151	-109.464	Chicken Springs Draw	16		Wilkins Peak Member		14	8.3	3.8	1.7	3.1														123.19	89850	1950	40	10	1770	50
503		LG		lg	5		I	7	Wilkins Peak	mudstone	interior		overbank	mix	C	in		41.4151	-109.464	Chicken Springs Draw	17		Wilkins Peak Member		18	8.7	3.8	1.7	4.9														123.39	78320	1900	50	10	990	40
504		LG		lg	5		I	7	Wilkins Peak	mudstone	interior		overbank	mix	C	in		41.4151	-109.464	Chicken Springs Draw	17.5		Wilkins Peak Member		18	8.6	1.6	1.2	15.3														122.27	45010	2170	0	20	460	40
505		LG		lg	5		I	7	Wilkins Peak	mudstone	interior		overbank	mix	C	in		41.4151	-109.464	Chicken Springs Draw	18		Wilkins Peak Member		18	10.7	1.3	2.4	23.9														152.31	19480	1380	0	20	480	40
506		LG		lg	5		I	7	Wilkins Peak	mudstone	interior		overbank	mix	C	in		41.4151	-109.464	Chicken Springs Draw	18.5		Wilkins Peak Member		18	12	4.2	4.3	12.7														123.15	43280	1640	0	20	580	40
507		LG		lg	5		I	7	Wilkins Peak	mudstone	interior		overbank	mix	C	in		41.4151	-109.464	Chicken Springs Draw	19		Wilkins Peak Member		18	10.3	4.5	2.2	4.2														123.51	29460	1400	0	20	390	50
508		LG		lg	5		I	7	Wilkins Peak	mudstone	interior		overbank	mix	C	in		41.4151	-109.464	Chicken Springs Draw	19.5		Wilkins Peak Member		19	8.9	4.2	2.9	2.9														122.92	40690	1520	30	10	1380	50
509		LG		lg	5		I	7	Wilkins Peak	mudstone	interior		overbank	mix	C	in		41.4151	-109.464	Chicken Springs Draw	20		Wilkins Peak Member		18	7.4	3	1.9	4.5														121.7	101810	2180	40	10	1870	50
510		LG		lg	5		I	7	Wilkins Peak	mudstone	interior		overbank	mix	C	in		41.4151	-109.464	Chicken Springs Draw	20.5		Wilkins Peak Member		19	8.5	3.8	2	4.3														123.24	67990	1880	160	10	410	40
511		LG		lg	3.5	vf	I	7	Wilkins Peak	sandstone	interior		fluvial	mix	C	in		41.4151	-109.464	Chicken Springs Draw	21		Wilkins Peak Member		16	5	1.5	2	3.4														121.94	35960	1610	20	10	630	50
512		LG		lg	5			7	Wilkins Peak	carbonate	interior		profundal	mix	C	in		41.4151	-109.464	Chicken Springs Draw	21.5		Wilkins Peak Member		12	5.6	2.2	1.3	4.9														121.71	37820	1820	0	20	530	50
513		LG		lg	5			7	Wilkins Peak	carbonate	interior		profundal	mix	C	in		41.4151	-109.464	Chicken Springs Draw	22		Wilkins Peak Member		12	9.1	2.2	4.2	8														121.19	70620	2620	0	20	1090	50
514		LG		lg	5			7	Wilkins Peak	carbonate	interior		profundal	mix	C	in		41.4151	-109.464	Chicken Springs Draw	22.5		Wilkins Peak Member		13	6.6	2.2	2.6	6.2														121.09	37720	1860	0	20	440	40
515		LG		lg	3			7	Wilkins Peak	carbonate	interior		littoral	mix	C	in		41.4151	-109.464	Chicken Springs Draw	23		Wilkins Peak Member		8	6.4	1.9	2.9	5.1														121.4	44330	1930	20	10	360	40
516		LG		lg	3			7	Wilkins Peak	carbonate	interior		littoral	mix	C	in		41.4151	-109.464	Chicken Springs Draw	23.5		Wilkins Peak Member		9	5.6	1.6	2.2	4.2														122.95	56730	2290	0	20	430	40
517		LG		lg	3			7	Wilkins Peak	carbonate	interior		littoral	mix	C	in		41.4151	-109.464	Chicken Springs Draw	24		Wilkins Peak Member		8	4.8	1.3	2.4	4.5														122.67	45530	2470	0	20	520	40
518		LG		lg	5			7	Wilkins Peak	carbonate	interior		profundal	mix	C	in		41.4151	-109.464	Chicken Springs Draw	24.5		Wilkins Peak Member		12	9.1	3.7	4.1	4.8														122.99	33110	1670	0	20	340	30
519		LG		lg	5			7	Wilkins Peak	carbonate	interior		profundal	mix	C	in		41.4151	-109.464	Chicken Springs Draw	25		Wilkins Peak Member		12	5.7	1.6	3.7	4.2														122.97	37330	1690	0	20	380	40
520		LG		lg	5			7	Wilkins Peak	carbonate	interior		profundal	mix	C	in		41.4151	-109.464	Chicken Springs Draw	25.5		Wilkins Peak Member		12	5.9	1.8	2.5	5														122.53	30150	1660	0	20	290	40
521		LG		lg	5			7	Wilkins Peak	carbonate	interior		profundal	mix	C	in		41.4151	-109.464	Chicken Springs Draw	26		Wilkins Peak Member		12	6	1.9	3.2	4.5														123.2	27150	1580	0	20	560	40
522		LG		lg	5			7	Wilkins Peak	carbonate	interior		profundal	mix	C	in		41.4151	-109.464	Chicken Springs Draw	26.5		Wilkins Peak Member		12	4.7	1.1	3.1	5.1														123.25	19620	1350	0	20	260	40
523		LG		lg	5			7	Wilkins Peak	carbonate	interior		profundal	mix	C	in		41.4151	-109.464	Chicken Springs Draw	27		Wilkins Peak Member		12	7.1	1.8	3.3	7.6														122.3	35440	1700	0	20	350	40
524		LG		lg	5			7	Wilkins Peak	carbonate	interior		profundal	mix	C	in		41.4151	-109.464	Chicken Springs Draw	27.5		Wilkins Peak Member		12	8.4	2.9	3.4	5.2														122.9	37170	1530	0	20	280	40
525		LG		lg	5			7	Wilkins Peak	carbonate	interior		profundal	mix	C	in		41.4151	-109.464	Chicken Springs Draw	28.5		Wilkins Peak Member		12	5.1	1.9	1.8	2.8														123.16	44260	1660	0	20	450	40
526		LG		lg	5			7	Wilkins Peak	carbonate	interior		profundal	mix	C	in		41.4151	-109.464	Chicken Springs Draw	29		Wilkins Peak Member		12	5.6	2.4	1.7	1.1														123.16	20170	1570	0	20	380	40
527		LG		lg	5			7	Wilkins Peak	carbonate	interior		profundal	mix	C	in		41.4151	-109.464	Chicken Springs Draw	29.5		Wilkins Peak Member		12	4.5	1.6	1.6	2.9														122.24	45460	1740	0	20	390	40
528		LG		lg	5			7	Wilkins Peak	carbonate	interior		profundal	mix	C	in		41.4151	-109.464	Chicken Springs Draw	30		Wilkins Peak Member		12	7.5	2.3	2.7	3.7														130.48	27670	1580	0	20	440	40
529		LG		lg	5			7	Wilkins Peak	carbonate	interior		profundal	mix	C	in		41.4151	-109.464	Chicken Springs Draw	30.5		Wilkins Peak Member		12	6.4	1.8	2.9	5.2														122.14	29260	1650	0	20	440	40
530		LG		lg	5			7	Wilkins Peak	carbonate	interior		profundal	mix	C	in		41.4151	-109.464	Chicken Springs Draw	31		Wilkins Peak Member		13	7	2.5	2.4	5.1														122.57	41340	1630	0	20	320	40
531		LG		lg	4			7	Wilkins Peak	carbonate	interior		palustrine	mix	C	in		41.4151	-109.464	Chicken Springs Draw	31.5		Wilkins Peak Member		2	6.4	2.2	3.2	5.5														127.03	14680	1340	0	20	440	40
532		LG		lg	4			7	Wilkins Peak	carbonate	interior		palustrine	mix	C	in		41.4151	-109.464	Chicken Springs Draw	32		Wilkins Peak Member		3	7	1.9	4	5.4														121.35	51930	2000	0	20	400	40
533		LG		lg	5			7	Wilkins Peak	carbonate	interior		profundal	mix	C	in		41.4151	-109.464	Chicken Springs Draw	32.5		Wilkins Peak Member		12	4.6	1.5	2.4	5.1														122.64	35520	1680	0	20	420	40
534		LG		lg	3			7	Wilkins Peak	tuff	interior		tuff	mix	C	in		41.4151	-109.464	Chicken Springs Draw	33		Wilkins Peak Member			7.4	1.8	4.7	5.7														121.79	28550	1720	0	20	480	40
535		LG		lg	5			7	Wilkins Peak	carbonate	interior		profundal	mix	C	in		41.4151	-109.464	Chicken Springs Draw	33.5		Wilkins Peak Member		12	6	1.5	3.5	5.5														148.3	16200	1290	0	20	520	40
536		LG		lg	5			7	Wilkins Peak	carbonate	interior		profundal	mix	C	in		41.4151	-109.464	Chicken Springs Draw	34		Wilkins Peak Member		12	6.7	1.7	3	6.3														121.93	32580	1710	0	20	400	40
537		LG		lg	5			7	Wilkins Peak	carbonate	interior		profundal	mix	C	in		41.4151	-109.464	Chicken Springs Draw	34.5		Wilkins Peak Member		12	4.7	1.2	3.6	2.6														120.81	57410	2010	0	20	350	30
538		LG		lg	5			7	Wilkins Peak	carbonate	interior		profundal	mix	C	in		41.4151	-109.464	Chicken Springs Draw	35		Wilkins Peak Member		12	5.5	1.5	2.6	4.6														124.05	51870	1810	80	10	560	40
539		LG		lg	5			7	Wilkins Peak	carbonate	interior		profundal	mix	C	in		41.4151	-109.464	Chicken Springs Draw	35.5		Wilkins Peak Member		12	6.3	1.7	3.9	4.5														122.7	26300	1450	0	20	480	40
540		LG		lg	4			7	Wilkins Peak	carbonate	interior		palustrine	mix	C	in		41.4151	-109.464	Chicken Springs Draw	36		Wilkins Peak Member		1	5.8	1.4	3	5.9														122.12	27400	1410	20	10	460	40
541		LG		lg	4			7	Wilkins Peak	carbonate	interior		palustrine	mix	C	in		41.4151	-109.464	Chicken Springs Draw	36.5		Wilkins Peak Member		2	6.6	1.8	2.4	5.7														122.92	22180	1470	0	20	610	40
542		LG		lg	5			7	Wilkins Peak	carbonate	interior		profundal	mix	C	in		41.4151	-109.464	Chicken Springs Draw	37		Wilkins Peak Member		12	6.3	2	2.5	3.7														121.61	13750	1150	0	20	390	40
543		LG		lg	5			7	Wilkins Peak	carbonate	interior		profundal	mix	C	in		41.4151	-109.464	Chicken Springs Draw	37.5		Wilkins Peak Member		12	7.5	1.6	4.2	6.7														121.87	37970	1780	0	20	440	40
544		LG		lg	5			7	Wilkins Peak	carbonate	interior		profundal	mix	C	in		41.4151	-109.464	Chicken Springs Draw	38		Wilkins Peak Member		12	7.1	1.3	3.7	8.1														125.94	12900	1440	0	20	350	40
545		LG		lg	5			7	Wilkins Peak	carbonate	interior		profundal	mix	C	in		41.4151	-109.464	Chicken Springs Draw	38.5		Wilkins Peak Member		12	6.8	1.8	3.8	4.5														122	47690	1210	0	20	130	30
546		LG		lg	3			7	Wilkins Peak	carbonate	interior		littoral	mix	C	in		41.4151	-109.464	Chicken Springs Draw	39		Wilkins Peak Member		10	4.6	1.5	2.5	3														122.38	25940	1460	0	20	520	40
547		LG		lg	5			7	Wilkins Peak	carbonate	interior		profundal	mix	C	in		41.4151	-109.464	Chicken Springs Draw	39.5		Wilkins Peak Member		13	4.7	1.4	2.7	4.1														121.24	23410	1560	0	20	450	40
548		LG		lg	5			7	Wilkins Peak	carbonate	interior		profundal	mix	C	in		41.4151	-109.464	Chicken Springs Draw	40		Wilkins Peak Member		13	7	2.1	3.7	5.4														122.51	42410	1650	0	20	430	30
549		LG		lg	5			7	Wilkins Peak	carbonate	interior		profundal	mix	C	in		41.4151	-109.464	Chicken Springs Draw	40.5		Wilkins Peak Member		12	9.1	2.8	3.6	6.9														121.88	28930	1480	0	20	470	40
550		LG		lg	5			7	Wilkins Peak	carbonate	interior		profundal	mix	C	in		41.4151	-109.464	Chicken Springs Draw	41		Wilkins Peak Member		12	6.8	2.2	2.5	5.6														121.45	44950	2040	0	20	550	40
551		LG		lg	5			7	Wilkins Peak	carbonate	interior		profundal	mix	C	in		41.4151	-109.464	Chicken Springs Draw	41.5		Wilkins Peak Member		13	7.7	2.6	2.8	4.9														123.29	34790	1790	0	20	580	40
552		LG		lg	5			7	Wilkins Peak	carbonate	interior		profundal	mix	C	in		41.4151	-109.464	Chicken Springs Draw	42		Wilkins Peak Member		13	8.3	2.4	4.2	6.6														123.96	42400	1980	0	20	520	40
553		LG		lg	5			7	Wilkins Peak	carbonate	interior		profundal	mix	C	in		41.4151	-109.464	Chicken Springs Draw	42.5		Wilkins Peak Member		13	7.9	2.7	3	5														121.39	25010	1650	0	20	520	40
554		LG		lg	4			7	Wilkins Peak	carbonate	interior		palustrine	mix	C	in		41.4151	-109.464	Chicken Springs Draw	43		Wilkins Peak Member		1	6.9	2.3	2.4	4.6														134.79	37390	1840	0	20	490	40
555		LG		lg	4			7	Wilkins Peak	carbonate	interior		palustrine	mix	C	in		41.4151	-109.464	Chicken Springs Draw	43.5		Wilkins Peak Member		1	8.3	3.2	3.3	4.8														122.97	27800	1770	0	20	510	40
556		LG		lg	4			7	Wilkins Peak	carbonate	interior		palustrine	mix	C	in		41.4151	-109.464	Chicken Springs Draw	44		Wilkins Peak Member		1	11.4	3.4	6	7.5														122.34	33220	1920	0	20	540	50
557		LG		lg	4			7	Wilkins Peak	carbonate	interior		palustrine	mix	C	in		41.4151	-109.464	Chicken Springs Draw	44.5		Wilkins Peak Member		1	11.2	3.5	5.2	7.7														121.91	25130	1580	0	20	910	40
558		LG		lg	4			7	Wilkins Peak	carbonate	interior		palustrine	mix	C	in		41.4151	-109.464	Chicken Springs Draw	45		Wilkins Peak Member		1	20.5	3.7	12.8	17.7														121.8	14600	1860	0	20	410	40
559		LG		lg	3			7	Wilkins Peak	carbonate	interior		littoral	mix	C	in		41.4151	-109.464	Chicken Springs Draw	45.5		Wilkins Peak Member		8	13.4	4.9	4.3	7.8														122.26	107880	2670	30	10	380	40
560		LG		lg	3			7	Wilkins Peak	carbonate	interior		littoral	mix	C	in		41.4151	-109.464	Chicken Springs Draw	46		Wilkins Peak Member		8	10.9	4.1	2.8	5.7														122.76	80630	2490	0	20	420	40
561		LG		lg	3			7	Wilkins Peak	carbonate	interior		littoral	mix	C	in		41.4151	-109.464	Chicken Springs Draw	46.5		Wilkins Peak Member		8	10	3.6	2.7	6.2														123.59	72500	2430	0	20	570	40
562		LG		lg	4			7	Wilkins Peak	carbonate	interior		palustrine	mix	C	in		41.4151	-109.464	Chicken Springs Draw	47		Wilkins Peak Member		1	7.8	2.7	3.7	3.9														122.7	63570	2500	0	20	560	40
563		LG		lg	4			7	Wilkins Peak	carbonate	interior		palustrine	mix	C	in		41.4151	-109.464	Chicken Springs Draw	47.5		Wilkins Peak Member		1	9.6	3.4	4.2	5.7														121.23	19490	1530	20	10	550	50
564		LG		lg	3			7	Wilkins Peak	carbonate	interior		littoral	mix	C	in		41.4151	-109.464	Chicken Springs Draw	48.5		Wilkins Peak Member		8	7.8	2	3.1	5.2														121.46	61380	2480	0	20	600	40
565		LG		lg	5			7	Wilkins Peak	carbonate	interior		profundal	mix	C	in		41.4151	-109.464	Chicken Springs Draw	49		Wilkins Peak Member		13	9	2.1	5	9.9														121.48	30420	1650	0	20	720	40
566		LG		lg	4			12	Wilkins Peak	carbonate	interior		palustrine	mix	C	in		41.2755	-109.435	Greasewood Draw	0.5		Wilkins Peak Member		1	7.4	2.1	2.2	3.4														123.12	74030	3110	0	20	570	60
567		LG		lg	4			12	Wilkins Peak	carbonate	interior		palustrine	mix	C	in		41.2755	-109.435	Greasewood Draw	1		Wilkins Peak Member		1	8.1	2.5	3	6.6														122.95	6740	1270	0	20	670	100
568		LG		lg	5			12	Wilkins Peak	carbonate	interior		profundal	mix	C	in		41.2755	-109.435	Greasewood Draw	1.5		Wilkins Peak Member		13	8.1	2.3	3.7	5.7														125.16	4790	830	0	20	450	70
569		LG		lg	3			12	Wilkins Peak	carbonate	interior		littoral	mix	C	in		41.2755	-109.435	Greasewood Draw	2		Wilkins Peak Member		9	9.3	2.5	4.8	4.7														122.53	5210	1240	0	20	820	110
570		LG		lg	4			12	Wilkins Peak	carbonate	interior		palustrine	mix	C	in		41.2755	-109.435	Greasewood Draw	2.5		Wilkins Peak Member		1	13.1	2.6	7.6	7														121.23	5680	1260	0	20	630	100
571		LG		lg	4			12	Wilkins Peak	carbonate	interior		palustrine	mix	C	in		41.2755	-109.435	Greasewood Draw	3		Wilkins Peak Member		1	32	2.9	25.2	12.5														123.5	59720	2050	0	20	640	40
572		LG		lg	4			12	Wilkins Peak	carbonate	interior		palustrine	mix	C	in		41.2755	-109.435	Greasewood Draw	3.5		Wilkins Peak Member		1	42.2	2.9	16.1	31.9														122.24	22370	1160	0	20	440	50
573		LG		lg	4			12	Wilkins Peak	carbonate	interior		palustrine	mix	C	in		41.2755	-109.435	Greasewood Draw	4		Wilkins Peak Member		1	13.1	3.8	4.1	83.7														121.82	31410	1370	0	20	540	50
574		LG		lg	5		I	12	Wilkins Peak	mudstone	interior		overbank	mix	C	in		41.2755	-109.435	Greasewood Draw	4.5		Wilkins Peak Member		18	14.9	3.8	5.3	16.1														122	65370	1990	0	20	930	50
575		LG		lg	5		I	12	Wilkins Peak	mudstone	interior		overbank	mix	C	in		41.2755	-109.435	Greasewood Draw	5		Wilkins Peak Member		18	12.8	4.4	4.4	16.4														122.54	53360	1910	0	20	450	50
576		LG		lg	3.5	vf	I	12	Wilkins Peak	sandstone	interior		overbank	mix	C	in		41.2755	-109.435	Greasewood Draw	5.5		Wilkins Peak Member		20	10.7	4.5	3.1	9.6														122.35	53300	1420	0	20	430	50
577		LG		lg	3.5	vf	I	12	Wilkins Peak	sandstone	interior		overbank	mix	C	in		41.2755	-109.435	Greasewood Draw	6		Wilkins Peak Member		20	11.4	4.7	2.3	3.9														121.31	14070	1140	20	10	840	90
578		LG		lg	3.5	vf	I	12	Wilkins Peak	sandstone	interior		overbank	mix	C	in		41.2755	-109.435	Greasewood Draw	6.5		Wilkins Peak Member		20	10	3.7	3.5	6.5														122.26	25870	1220	0	20	860	80
579		LG		lg	2.5	f	I	12	Wilkins Peak	sandstone	interior		fluvial	mix	C	in		41.2755	-109.435	Greasewood Draw	7		Wilkins Peak Member		14	8.9	3.5	2.8	4.7														122.03	32940	1160	0	20	670	60
580		LG		lg	2.5	f	I	12	Wilkins Peak	sandstone	interior		fluvial	mix	C	in		41.2755	-109.435	Greasewood Draw	7.5		Wilkins Peak Member		15	7.4	2.7	3.4	3.6														123.01	49260	1740	20	10	850	50
581		LG		lg	2.5	f	I	12	Wilkins Peak	sandstone	interior		fluvial	mix	C	in		41.2755	-109.435	Greasewood Draw	8.5		Wilkins Peak Member		14	7.7	2.7	2.9	4.3														121.2	68640	1600	0	20	640	40
582		LG		lg	2.5	f	I	12	Wilkins Peak	sandstone	interior		fluvial	mix	C	in		41.2755	-109.435	Greasewood Draw	9		Wilkins Peak Member		15	8.2	2.6	2.7	2.7														122.27	72020	1580	0	20	690	40
583		LG		lg	5		I	12	Wilkins Peak	mudstone	interior		overbank	mix	C	in		41.2755	-109.435	Greasewood Draw	9.5		Wilkins Peak Member		18	6.8	2	3	3.8														121.51	31670	1050	0	20	630	50
584		LG		lg	5		I	12	Wilkins Peak	mudstone	interior		overbank	mix	C	in		41.2755	-109.435	Greasewood Draw	10		Wilkins Peak Member		15	7.2	2	3.2	4.7														123.26	47100	1180	0	20	520	40
585		LG		lg	5		I	12	Wilkins Peak	mudstone	interior		overbank	mix	C	in		41.2755	-109.435	Greasewood Draw	10.5		Wilkins Peak Member		18	7.1	2.2	2.3	3.3														121.66	41920	1350	0	20	600	50
586		LG		lg	5		I	12	Wilkins Peak	mudstone	interior		overbank	mix	C	in		41.2755	-109.435	Greasewood Draw	11		Wilkins Peak Member		19	9.4	3.3	2.2	5.9														122.24	35170	1840	0	20	1050	110
587		LG		lg	5		I	12	Wilkins Peak	mudstone	interior		overbank	mix	C	in		41.2755	-109.435	Greasewood Draw	11.5		Wilkins Peak Member		19	9.1	3.6	3	4.5														122.65	76120	2110	0	20	610	50
588		LG		lg	5		I	12	Wilkins Peak	mudstone	interior		overbank	mix	C	in		41.2755	-109.435	Greasewood Draw	12		Wilkins Peak Member		19	9.9	3.4	2.3	6.2														96.08	0	10480	0	20	490	130
589		LG		lg	5		I	12	Wilkins Peak	mudstone	interior		overbank	mix	C	in		41.2755	-109.435	Greasewood Draw	12.5		Wilkins Peak Member		19	10.5	3.4	2.8	9.3														122.61	30460	1300	0	20	480	60
590		LG		lg	5		I	12	Wilkins Peak	mudstone	interior		overbank	mix	C	in		41.2755	-109.435	Greasewood Draw	13		Wilkins Peak Member		19	10.2	3.7	1.1	9.9														122.06	29580	1660	20	10	1530	100
591		LG		lg	5		I	12	Wilkins Peak	mudstone	interior		overbank	mix	C	in		41.2755	-109.435	Greasewood Draw	13.5		Wilkins Peak Member		19	9.9	3.2	1.7	9.7														121.15	48880	1540	0	20	800	50
592		LG		lg	5		I	12	Wilkins Peak	mudstone	interior		overbank	mix	C	in		41.2755	-109.435	Greasewood Draw	14		Wilkins Peak Member		19	9.8	3.7	2.8	7.7														121.76	29850	1250	20	10	710	60
593		LG		lg	5		I	12	Wilkins Peak	mudstone	interior		overbank	mix	C	in		41.2755	-109.435	Greasewood Draw	14.5		Wilkins Peak Member		19	11.1	4.4	2.3	7.8														122.46	62870	2100	0	20	510	50
594		LG		lg	5		I	12	Wilkins Peak	mudstone	interior		overbank	mix	C	in		41.2755	-109.435	Greasewood Draw	15		Wilkins Peak Member		19	12	4.4	2.3	8.7														120.91	31120	1520	0	20	640	60
595		LG		lg	5		I	12	Wilkins Peak	mudstone	interior		overbank	mix	C	in		41.2755	-109.435	Greasewood Draw	15.5		Wilkins Peak Member		19	10.5	3.4	3.3	8.2														121.31	28350	1610	0	20	700	80
596		LG		lg	5		I	12	Wilkins Peak	mudstone	interior		overbank	mix	C	in		41.2755	-109.435	Greasewood Draw	16		Wilkins Peak Member		19	10.8	3.5	3.3	8.8														123.05	28670	1410	20	10	570	60
597		LG		lg	5		I	12	Wilkins Peak	mudstone	interior		overbank	mix	C	in		41.2755	-109.435	Greasewood Draw	16.5		Wilkins Peak Member		18	11.7	3.8	2.4	9.2														122.44	28100	1370	40	10	430	50
598		LG		lg	5		I	12	Wilkins Peak	mudstone	interior		overbank	mix	C	in		41.2755	-109.435	Greasewood Draw	17		Wilkins Peak Member		18	11	3.6	2.7	8.2														122.45	7970	840	20	10	320	60
599		LG		lg	4			12	Wilkins Peak	carbonate	interior		palustrine	mix	C	in		41.2755	-109.435	Greasewood Draw	17.5		Wilkins Peak Member		3	10.7	4	2.4	6.2														122.2	8050	1230	0	20	420	80
600		LG		lg	4			12	Wilkins Peak	carbonate	interior		palustrine	mix	C	in		41.2755	-109.435	Greasewood Draw	18		Wilkins Peak Member		1	7.4	1	3.4	4.7														122.27	34030	1570	20	10	570	50
601		LG		lg	4			12	Wilkins Peak	carbonate	interior		palustrine	mix	C	in		41.2755	-109.435	Greasewood Draw	18.5		Wilkins Peak Member		1	16.3	1.6	4.8	7.2														122.13	19630	1210	0	20	580	70
602		LG		lg	4			12	Wilkins Peak	carbonate	interior		palustrine	mix	C	in		41.2755	-109.435	Greasewood Draw	19		Wilkins Peak Member		2	48.6	2.4	17.7	23.8														122.63	13920	1020	20	10	370	60
603		LG		lg	4			12	Wilkins Peak	carbonate	interior		palustrine	mix	C	in		41.2755	-109.435	Greasewood Draw	19.5		Wilkins Peak Member		2	15.3	1.7	5.2	91.3														121.71	14830	1380	0	20	430	50
604		LG		lg	4			12	Wilkins Peak	carbonate	interior		palustrine	mix	C	in		41.2755	-109.435	Greasewood Draw	20		Wilkins Peak Member		1	11	1.7	4.4	25.1														123.28	55270	2080	0	20	1050	60
605		LG		lg	3			12	Wilkins Peak	carbonate	interior		littoral	mix	C	in		41.2755	-109.435	Greasewood Draw	20.5		Wilkins Peak Member		8																		120.98	93660	1780	20	10	230	30
606		LG		lg	5			12	Wilkins Peak	carbonate	interior		profundal	mix	C	in		41.2755	-109.435	Greasewood Draw	21		Wilkins Peak Member		13																		122.21	34830	1750	40	10	500	40
607		LG		lg	5			12	Wilkins Peak	carbonate	interior		profundal	mix	C	in		41.2755	-109.435	Greasewood Draw	21.5		Wilkins Peak Member		12																		160.4	42250	2010	20	10	550	40
608		LG		lg	5			12	Wilkins Peak	carbonate	interior		profundal	mix	C	in		41.2755	-109.435	Greasewood Draw	22		Wilkins Peak Member		12																		120.96	54590	2260	20	10	480	40
609		LG		lg	5			12	Wilkins Peak	carbonate	interior		profundal	mix	C	in		41.2755	-109.435	Greasewood Draw	22.5		Wilkins Peak Member		12																		122.84	71950	1750	40	10	350	30
610		LG		lg	3			12	Wilkins Peak	carbonate	interior		littoral	mix	C	in		41.2755	-109.435	Greasewood Draw	23		Wilkins Peak Member		7																		122.18	59020	2500	20	10	780	50
611		LG		lg	5			12	Wilkins Peak	carbonate	interior		profundal	mix	C	in		41.2755	-109.435	Greasewood Draw	23.5		Wilkins Peak Member		12																		122.03	56750	2480	20	10	730	50
612		LG		lg	5			12	Wilkins Peak	carbonate	interior		profundal	mix	C	in		41.2755	-109.435	Greasewood Draw	24		Wilkins Peak Member		12																		127.21	51720	2210	0	20	1840	50
613		LG		lg	5			12	Wilkins Peak	carbonate	interior		profundal	mix	C	in		41.2755	-109.435	Greasewood Draw	24.5		Wilkins Peak Member		12																		131.64	45260	1680	20	10	550	40
614		LG		lg	4			12	Wilkins Peak	carbonate	interior		palustrine	mix	C	in		41.2755	-109.435	Greasewood Draw	25		Wilkins Peak Member		1																		122.66	48370	2030	0	20	510	40
615		LG		lg	4			12	Wilkins Peak	carbonate	interior		palustrine	mix	C	in		41.2755	-109.435	Greasewood Draw	25.5		Wilkins Peak Member		1																		121.89	33490	2070	0	20	600	50
616		LG		lg	4			12	Wilkins Peak	carbonate	interior		palustrine	mix	C	in		41.2755	-109.435	Greasewood Draw	26		Wilkins Peak Member		1																		121.32	46240	2320	0	20	540	50
617		LG		lg	4			12	Wilkins Peak	carbonate	interior		palustrine	mix	C	in		41.2755	-109.435	Greasewood Draw	26.5		Wilkins Peak Member		1																		122.54	62950	2610	0	20	480	40
618		LG		lg	5			12	Wilkins Peak	carbonate	interior		profundal	mix	C	in		41.2755	-109.435	Greasewood Draw	27		Wilkins Peak Member		13																		121.04	44660	1730	0	20	550	40
619		LG		lg	5			12	Wilkins Peak	carbonate	interior		profundal	mix	C	in		41.2755	-109.435	Greasewood Draw	27.5		Wilkins Peak Member		13																		120.85	46400	2100	0	20	490	40
620		LG		lg	4			12	Wilkins Peak	carbonate	interior		palustrine	mix	C	in		41.2755	-109.435	Greasewood Draw	28		Wilkins Peak Member		1																		121.64	63330	2220	20	10	620	40
621		LG		lg	4			12	Wilkins Peak	carbonate	interior		palustrine	mix	C	in		41.2755	-109.435	Greasewood Draw	28.5		Wilkins Peak Member		1																		121.59	8360	1280	0	20	460	40
622		LG		lg	5			12	Wilkins Peak	carbonate	interior		profundal	mix	C	in		41.2755	-109.435	Greasewood Draw	29		Wilkins Peak Member		13																		123.57	44950	1920	0	20	520	40
623		LG		lg	4			12	Wilkins Peak	carbonate	interior		palustrine	mix	C	in		41.2755	-109.435	Greasewood Draw	29.5		Wilkins Peak Member		1																		122.26	60130	2210	20	10	710	40
624		LG		lg	3			12	Wilkins Peak	carbonate	interior		littoral	mix	C	in		41.2755	-109.435	Greasewood Draw	30		Wilkins Peak Member		8																		134.83	59140	2200	0	20	820	40
625		LG		lg	3			12	Wilkins Peak	carbonate	interior		littoral	mix	C	in		41.2755	-109.435	Greasewood Draw	30.5		Wilkins Peak Member		8																		129.52	60590	2240	20	10	760	40
626		LG		lg	5			12	Wilkins Peak	carbonate	interior		profundal	mix	C	in		41.2755	-109.435	Greasewood Draw	31		Wilkins Peak Member		12																		122.73	52170	2040	20	10	560	40
627		LG		lg	5			12	Wilkins Peak	carbonate	interior		profundal	mix	C	in		41.2755	-109.435	Greasewood Draw	31.5		Wilkins Peak Member		12																		153.46	57360	2220	0	20	620	40
628		LG		lg	5			12	Wilkins Peak	carbonate	interior		profundal	mix	C	in		41.2755	-109.435	Greasewood Draw	32		Wilkins Peak Member		12																		127.85	43450	1740	0	20	610	40
629		LG		lg	5			12	Wilkins Peak	carbonate	interior		profundal	mix	C	in		41.2755	-109.435	Greasewood Draw	32.5		Wilkins Peak Member		12																		122.38	30000	1470	0	20	510	40
630		LG		lg	5			12	Wilkins Peak	carbonate	interior		profundal	mix	C	in		41.2755	-109.435	Greasewood Draw	33		Wilkins Peak Member		12																		122.96	37730	1980	0	20	640	40
631		LG		lg	5			12	Wilkins Peak	carbonate	interior		profundal	mix	C	in		41.2755	-109.435	Greasewood Draw	33.5		Wilkins Peak Member		12																		123.59	41870	1870	0	20	600	40
632		LG		lg	3			12	Wilkins Peak	carbonate	interior		littoral	mix	C	in		41.2755	-109.435	Greasewood Draw	34		Wilkins Peak Member		6																		121.98	39040	1840	0	20	460	40
633		LG		lg	4			12	Wilkins Peak	carbonate	interior		palustrine	mix	C	in		41.2755	-109.435	Greasewood Draw	34.5		Wilkins Peak Member		1																		130.95	38070	1950	0	20	660	40
634		LG		lg	3			12	Wilkins Peak	tuff	interior		tuff	mix	C	in		41.2755	-109.435	Greasewood Draw	35		Wilkins Peak Member																				122.57	34880	1580	20	10	490	40
635		LG		lg	5			12	Wilkins Peak	carbonate	interior		profundal	mix	C	in		41.2755	-109.435	Greasewood Draw	35.5		Wilkins Peak Member		13																		122	47510	2020	0	20	1220	50
636		LG		lg	5			12	Wilkins Peak	carbonate	interior		profundal	mix	C	in		41.2755	-109.435	Greasewood Draw	36		Wilkins Peak Member		13																		121.26	48390	1990	0	20	520	40
637		LG		lg	5			12	Wilkins Peak	carbonate	interior		profundal	mix	C	in		41.2755	-109.435	Greasewood Draw	37		Wilkins Peak Member		12																		122.44	33530	1820	20	10	660	40
638		LG		lg	5			12	Wilkins Peak	carbonate	interior		profundal	mix	C	in		41.2755	-109.435	Greasewood Draw	37.5		Wilkins Peak Member		13																		126.06	59480	2170	0	20	600	40
639		LG		lg	5			12	Wilkins Peak	carbonate	interior		profundal	mix	C	in		41.2755	-109.435	Greasewood Draw	38		Wilkins Peak Member		12																		121.76	27800	1530	0	20	570	40
640		LG		lg	5			12	Wilkins Peak	carbonate	interior		profundal	mix	C	in		41.2755	-109.435	Greasewood Draw	38.5		Wilkins Peak Member		12																		121.03	36350	1880	0	20	610	40
641		LG		lg	5			12	Wilkins Peak	carbonate	interior		profundal	mix	C	in		41.2755	-109.435	Greasewood Draw	39		Wilkins Peak Member		12																		149.58	44030	2050	0	20	500	40
642		LG		lg	5			12	Wilkins Peak	carbonate	interior		profundal	mix	C	in		41.2755	-109.435	Greasewood Draw	39.5		Wilkins Peak Member		12																		121.31	41090	1950	0	20	580	40
643		LG		lg	5			12	Wilkins Peak	carbonate	interior		profundal	mix	C	in		41.2755	-109.435	Greasewood Draw	40		Wilkins Peak Member		12																		124.64	25640	1500	0	20	460	40
644		LG		lg	5			12	Wilkins Peak	carbonate	interior		profundal	mix	C	in		41.2755	-109.435	Greasewood Draw	40.5		Wilkins Peak Member		12																		122.63	54500	2170	0	20	570	40
645		LG		lg	4			12	Wilkins Peak	carbonate	interior		palustrine	mix	C	in		41.2755	-109.435	Greasewood Draw	41		Wilkins Peak Member		1																		122.23	45740	2080	0	20	580	40
646		LG		lg	4			12	Wilkins Peak	carbonate	interior		palustrine	mix	C	in		41.2755	-109.435	Greasewood Draw	41.5		Wilkins Peak Member		1																		122.17	45910	1960	0	20	470	40
647		LG		lg	4			12	Wilkins Peak	carbonate	interior		palustrine	mix	C	in		41.2755	-109.435	Greasewood Draw	42		Wilkins Peak Member		1																		122.18	19390	1850	0	20	720	50
648		LG		lg	4			12	Wilkins Peak	carbonate	interior		palustrine	mix	C	in		41.2755	-109.435	Greasewood Draw	42.5		Wilkins Peak Member		1																		124.01	43720	2290	0	20	960	50
649		LG		lg	4			12	Wilkins Peak	carbonate	interior		palustrine	mix	C	in		41.2755	-109.435	Greasewood Draw	43		Wilkins Peak Member		1																		121.34	42010	1830	0	20	480	50
650		LG		lg	4			12	Wilkins Peak	carbonate	interior		palustrine	mix	C	in		41.2755	-109.435	Greasewood Draw	43.5		Wilkins Peak Member		1																		122.17	51970	1910	0	20	440	40
651		LG		lg	4			12	Wilkins Peak	carbonate	interior		palustrine	mix	C	in		41.2755	-109.435	Greasewood Draw	44		Wilkins Peak Member		1																		122.87	51670	2220	0	20	590	40
652		LG		lg	4			25	Wilkins Peak	carbonate	periphery		palustrine	mix	C	in		41.0367	-109.558	Pipeline West	14		Wilkins Peak Member		23	4	1	2	4.9														122.85	63510	2160	20	10	510	40
653		LG		lg	3			25	Wilkins Peak	carbonate	periphery		littoral	mix	C	in		41.0367	-109.558	Pipeline West	14.5		Wilkins Peak Member		24	4.3	0.9	3.5	2.5														122.94	40250	1710	0	20	450	40
654		LG		lg	3.5	vf	I	25	Wilkins Peak	sandstone	periphery		littoral	mix	C	in		41.0367	-109.558	Pipeline West	15		Wilkins Peak Member		26	4.7	1.1	3	4.1														122.12	27170	940	0	20	340	30
655		LG		lg	3.5	vf	I	25	Wilkins Peak	sandstone	periphery		littoral	mix	C	in		41.0367	-109.558	Pipeline West	15.5		Wilkins Peak Member		26	4.4	0.9	1.8	4.9														122.68	50200	2070	20	10	350	40
656		LG		lg	5		I	25	Wilkins Peak	mudstone	periphery		littoral	mix	C	in		41.0367	-109.558	Pipeline West	16		Wilkins Peak Member		26	5.3	1.1	3.3	4.4														122.14	47430	2230	20	10	420	40
657		LG		lg	5		I	25	Wilkins Peak	mudstone	periphery		littoral	mix	C	in		41.0367	-109.558	Pipeline West	16.5		Wilkins Peak Member		26	6.3	1.4	3.4	6.8														122.45	37340	2020	20	10	430	40
658		LG		lg	0.5	c	I	25	Wilkins Peak	sandstone	periphery		littoral	mix	C	in		41.0367	-109.558	Pipeline West	17		Wilkins Peak Member		26	6.1	1.1	3.9	4.5														123.66	42900	1750	30	10	440	50
659		LG		lg	3.5	vf	I	25	Wilkins Peak	sandstone	periphery		littoral	mix	C	in		41.0367	-109.558	Pipeline West	17.5		Wilkins Peak Member		26	7.3	1.4	4.1	7.9														125.19	48960	1580	30	10	380	40
660		LG		lg	4			25	Wilkins Peak	carbonate	periphery		palustrine	mix	C	in		41.0367	-109.558	Pipeline West	18		Wilkins Peak Member		23	6.3	1.2	3.2	6.1														124.19	44200	1760	20	10	420	40
661		LG		lg	2		I	25	Wilkins Peak	sandstone	periphery		littoral	mix	C	in		41.0367	-109.558	Pipeline West	18.5		Wilkins Peak Member		26	7.2	1	3.6	7.6														122.26	35440	1650	20	10	440	40
662		LG		lg	4			25	Wilkins Peak	carbonate	periphery		palustrine	mix	C	in		41.0367	-109.558	Pipeline West	19		Wilkins Peak Member		23	8.7	2.1	5	7.2														123.13	32640	1520	20	10	420	40
663		LG		lg	3			25	Wilkins Peak	carbonate	periphery		littoral	mix	C	in		41.0367	-109.558	Pipeline West	19.5		Wilkins Peak Member		24	6.2	1.5	3.9	5														122.74	61970	1940	0	20	430	40
664		LG		lg	3.5	vf	I	25	Wilkins Peak	sandstone	periphery		littoral	mix	C	in		41.0367	-109.558	Pipeline West	20		Wilkins Peak Member		26	5.2	1	4.1	3.1														133.26	29820	1380	0	20	400	40
665		LG		lg	4			25	Wilkins Peak	carbonate	periphery		palustrine	mix	C	in		41.0367	-109.558	Pipeline West	20.5		Wilkins Peak Member		22	4.3	1	2.5	3.4														122.1	36900	1710	0	20	370	40
666		LG		lg	3.5	vf	I	25	Wilkins Peak	sandstone	periphery		fluvial	mix	C	in		41.0367	-109.558	Pipeline West	21		Wilkins Peak Member		30	4.4	1	2.1	3.2														121.38	26930	1430	0	20	340	40
667		LG		lg	3.5	vf	I	25	Wilkins Peak	sandstone	periphery		fluvial	mix	C	in		41.0367	-109.558	Pipeline West	21.5		Wilkins Peak Member		30	4.7	1.2	2.3	3.6														123.51	26360	1320	0	20	380	40
668		LG		lg	3.5	vf	I	25	Wilkins Peak	sandstone	periphery		littoral	mix	C	in		41.0367	-109.558	Pipeline West	22		Wilkins Peak Member		26	4.1	1	2.5	1.9														121.45	41030	1760	20	10	570	40
669		LG		lg	4			25	Wilkins Peak	carbonate	periphery		palustrine	mix	C	in		41.0367	-109.558	Pipeline West	22.5		Wilkins Peak Member		23	4.5	0.9	1.8	5														123.18	35010	1560	0	20	400	40
670		LG		lg	0.5	c	I	25	Wilkins Peak	sandstone	periphery		littoral	mix	C	in		41.0367	-109.558	Pipeline West	23		Wilkins Peak Member		26	3.8	0.7	3.1	4.2														122.59	34290	1910	30	10	480	50
671		LG		lg	2.5	f	I	25	Wilkins Peak	sandstone	periphery		littoral	mix	C	in		41.0367	-109.558	Pipeline West	23.5		Wilkins Peak Member		26	4.9	0.8	3.3	4														122.42	31590	1830	0	20	530	40
672		LG		lg	5			25	Wilkins Peak	carbonate	periphery		profundal	mix	C	in		41.0367	-109.558	Pipeline West	24		Wilkins Peak Member		27	5.1	0.9	3.4	4.9														122.29	33860	1830	0	20	680	50
673		LG		lg	5			25	Wilkins Peak	carbonate	periphery		profundal	mix	C	in		41.0367	-109.558	Pipeline West	24.5		Wilkins Peak Member		27	5.2	1.1	3.8	4.4														122.89	41960	1620	0	20	540	40
674		LG		lg	5			25	Wilkins Peak	carbonate	periphery		profundal	mix	C	in		41.0367	-109.558	Pipeline West	25		Wilkins Peak Member		27	3.2	0.8	2.1	2.3														122.45	21450	1350	0	20	430	40
675		LG		lg	5			25	Wilkins Peak	carbonate	periphery		profundal	mix	C	in		41.0367	-109.558	Pipeline West	25.5		Wilkins Peak Member		27	4.3	0.9	3.4	2.7														122.55	21590	1450	0	20	560	50
676		LG		lg	5		I	25	Wilkins Peak	mudstone	periphery		overbank	mix	C	in		41.0367	-109.558	Pipeline West	0		Wilkins Peak Member		32	8.6	2.3	3.5	6.5														122.08	51610	1660	0	20	400	50
677		LG		lg	5		I	25	Wilkins Peak	mudstone	periphery		overbank	mix	C	in		41.0367	-109.558	Pipeline West	0.5		Wilkins Peak Member		32	8.8	1.8	3.4	5.1														122.75	60270	1670	40	10	500	40
678		LG		lg	3		I	25	Wilkins Peak	sandstone	periphery		littoral	mix	C	in		41.0367	-109.558	Pipeline West	1.5		Wilkins Peak Member		24	7.2	1.4	3.3	5.2														121.2	73740	2090	0	20	550	40
679		LG		lg	2.5	f	I	25	Wilkins Peak	sandstone	periphery		fluvial	mix	C	in		41.0367	-109.558	Pipeline West	2		Wilkins Peak Member		30	8.8	1.8	3.2	4.9														122.1	27180	1200	0	20	430	40
680	PW-4 17.5	LG	MES	lg	1.5	medium	I	25	Wilkins Peak	sandstone	periphery		fluvial	mix	C	in		41.0367	-109.558	Pipeline West	2.5		Wilkins Peak Member		30	6.2	1.8	2.3	4.3	0.921671	0.0417755	0.0365535	0	0.0339426	0.859223	0.0412621	0.0242718	0.0145631	0	0	0	0.213592	122.27	62140	2430	20	10	1100	50
681		LG		lg	3		I	25	Wilkins Peak	sandstone	periphery		littoral	mix	C	in		41.0367	-109.558	Pipeline West	3		Wilkins Peak Member		24	6.9	2	4.1	4.5														122.07	26300	1060	0	20	300	30
682		LG		lg	3.5	vf	I	25	Wilkins Peak	sandstone	periphery		fluvial	mix	C	in		41.0367	-109.558	Pipeline West	3.5		Wilkins Peak Member		30	5.2	1.5	2.6	4.2														121.82	49030	2020	0	20	460	40
683		LG		lg	4			25	Wilkins Peak	carbonate	periphery		palustrine	mix	C	in		41.0367	-109.558	Pipeline West	4.5		Wilkins Peak Member		22	5.2	1.6	2.1	3.3														121.46	52710	2190	0	20	440	40
684		LG		lg	3		I	25	Wilkins Peak	sandstone	periphery		littoral	mix	C	in		41.0367	-109.558	Pipeline West	5		Wilkins Peak Member		24	4	1	2	4.1														121.34	67210	1810	20	10	370	40
685		LG		lg	3.5	vf	I	25	Wilkins Peak	sandstone	periphery		littoral	mix	C	in		41.0367	-109.558	Pipeline West	5.5		Wilkins Peak Member		26	5	1.4	1.6	4.3														122.12	86520	3410	20	10	410	60
686		LG		lg	4			25	Wilkins Peak	carbonate	periphery		palustrine	mix	C	in		41.0367	-109.558	Pipeline West	6		Wilkins Peak Member		23	4.6	1	1.7	3.9														122.59	72460	2490	40	10	560	40
687		LG		lg	4			25	Wilkins Peak	carbonate	periphery		palustrine	mix	C	in		41.0367	-109.558	Pipeline West	6.5		Wilkins Peak Member		22	5.8	1.1	2	4.5														120.28	41680	1970	20	10	500	40
688		LG		lg	5			25	Wilkins Peak	carbonate	periphery		profundal	mix	C	in		41.0367	-109.558	Pipeline West	7		Wilkins Peak Member		27	7.3	1	3.4	3.9														120.96	41170	1840	0	20	420	50
689		LG		lg	5			25	Wilkins Peak	carbonate	periphery		profundal	mix	C	in		41.0367	-109.558	Pipeline West	7.5		Wilkins Peak Member		27	6.7	1.2	2.6	3														122.79	51590	2080	0	20	530	40
690		LG		lg	5			25	Wilkins Peak	carbonate	periphery		profundal	mix	C	in		41.0367	-109.558	Pipeline West	8		Wilkins Peak Member		27	5.7	1.5	3.4	3.8														122.62	56660	2060	20	10	410	40
691		LG		lg	4			25	Wilkins Peak	carbonate	periphery		palustrine	mix	C	in		41.0367	-109.558	Pipeline West	8.5		Wilkins Peak Member		23	6.2	1.4	3.3	5.6														121.12	25880	1230	0	20	260	40
692		LG		lg	3.5	vf	I	25	Wilkins Peak	sandstone	periphery		fluvial	mix	C	in		41.0367	-109.558	Pipeline West	9		Wilkins Peak Member		30	9.3	2.4	2.6	7.4														121.17	27130	1270	20	10	450	40
693		LG		lg	3.5	vf	I	25	Wilkins Peak	sandstone	periphery		littoral	mix	C	in		41.0367	-109.558	Pipeline West	9.5		Wilkins Peak Member		26	4.6	1.2	2.8	3.7														121.58	25160	1500	0	20	370	50
694		LG		lg	5			25	Wilkins Peak	carbonate	periphery		profundal	mix	C	in		41.0367	-109.558	Pipeline West	10.5		Wilkins Peak Member		27	6.4	1.8	3	3.4														121.63	46240	1830	20	10	450	40
695		LG		lg	5			25	Wilkins Peak	carbonate	periphery		profundal	mix	C	in		41.0367	-109.558	Pipeline West	11		Wilkins Peak Member		27	4.2	0.8	2.5	4														120.92	27170	1830	20	10	410	40
696		LG		lg	5			25	Wilkins Peak	carbonate	periphery		profundal	mix	C	in		41.0367	-109.558	Pipeline West	11.5		Wilkins Peak Member		27	6	1.4	4.4	5.1														121.51	22170	1630	20	10	370	40
697		LG		lg	5			25	Wilkins Peak	carbonate	periphery		profundal	mix	C	in		41.0367	-109.558	Pipeline West	12		Wilkins Peak Member		27	6.1	1.4	2.9	6.3														121.41	46410	1970	30	10	380	40
698		LG		lg	4			25	Wilkins Peak	carbonate	periphery		palustrine	mix	C	in		41.0367	-109.558	Pipeline West	12.5		Wilkins Peak Member		22	5.3	1.1	2.8	4.8														122.7	48060	1870	20	10	340	40
699		LG		lg	3			25	Wilkins Peak	carbonate	periphery		littoral	mix	C	in		41.0367	-109.558	Pipeline West	13		Wilkins Peak Member		26	5.7	1.3	3.2	5.4														153.57	42830	1590	20	10	390	40
700		LG		lg	5			25	Wilkins Peak	carbonate	periphery		profundal	mix	C	in		41.0367	-109.558	Pipeline West	13.5		Wilkins Peak Member		27	6	1.1	3.5	5														123.24	45200	1690	20	10	440	40
701		LG		lg	4			11	Wilkins Peak	carbonate	interior		palustrine	mix	C	in		41.3421	-109.436	Firehole Canyon L	0		Wilkins Peak Member		3	6.4	1.4	4	3.9														122.11	36610	1600	0	20	340	40
702		LG		lg	5			11	Wilkins Peak	carbonate	interior		profundal	mix	C	in		41.3421	-109.436	Firehole Canyon L	0.5		Wilkins Peak Member		13	5.8	1.4	3.9	4.4														122.01	25090	1290	0	20	510	40
703		LG		lg	5			11	Wilkins Peak	carbonate	interior		profundal	mix	C	in		41.3421	-109.436	Firehole Canyon L	1		Wilkins Peak Member		12																		122.82	39540	1550	0	20	570	40
704		LG		lg	3			11	Wilkins Peak	carbonate	interior		littoral	mix	C	in		41.3421	-109.436	Firehole Canyon L	1.5		Wilkins Peak Member		6																		153.82	24720	1790	20	10	550	50
705		LG		lg	4			11	Wilkins Peak	carbonate	interior		palustrine	mix	C	in		41.3421	-109.436	Firehole Canyon L	2		Wilkins Peak Member		1																		121.58	23560	1430	0	20	600	40
706		LG		lg	4			11	Wilkins Peak	carbonate	interior		palustrine	mix	C	in		41.3421	-109.436	Firehole Canyon L	2.5		Wilkins Peak Member		1																		122.66	24100	1470	0	20	480	40
707		LG		lg	5		I	11	Wilkins Peak	mudstone	interior		overbank	mix	C	in		41.3421	-109.436	Firehole Canyon L	3		Wilkins Peak Member		18																		120.67	45660	1980	0	20	640	40
708		LG		lg	5		I	11	Wilkins Peak	mudstone	interior		overbank	mix	C	in		41.3421	-109.436	Firehole Canyon L	3.5		Wilkins Peak Member		18																		121.93	58770	2140	0	20	580	40
709		LG		lg	3.25	vfu	I	11	Wilkins Peak	sandstone	interior		overbank	mix	C	in		41.3421	-109.436	Firehole Canyon L	4		Wilkins Peak Member		20																		121.97	56850	1790	0	20	550	50
710		LG		lg	3.25	vfu	I	11	Wilkins Peak	sandstone	interior		overbank	mix	C	in		41.3421	-109.436	Firehole Canyon L	4.5		Wilkins Peak Member		17																		122.1	88950	1970	0	20	520	40
711		LG		lg	3.25	vfu	I	11	Wilkins Peak	sandstone	interior		fluvial	mix	C	in		41.3421	-109.436	Firehole Canyon L	5.5		Wilkins Peak Member		14																		136.34	85660	2040	0	20	580	40
712		LG		lg	3.25	vfu	I	11	Wilkins Peak	sandstone	interior		fluvial	mix	C	in		41.3421	-109.436	Firehole Canyon L	6		Wilkins Peak Member		15																		121.94	83720	1720	0	20	600	40
713		LG		lg	5		I	11	Wilkins Peak	mudstone	interior		overbank	mix	C	in		41.3421	-109.436	Firehole Canyon L	7		Wilkins Peak Member		19																		121.87	55360	1680	0	20	740	40
714		LG		lg	5		I	11	Wilkins Peak	mudstone	interior		overbank	mix	C	in		41.3421	-109.436	Firehole Canyon L	7.5		Wilkins Peak Member		18																		122.25	75070	2120	0	20	720	40
715		LG		lg	5		I	11	Wilkins Peak	mudstone	interior		overbank	mix	C	in		41.3421	-109.436	Firehole Canyon L	8		Wilkins Peak Member		18																		120.16	69980	1950	20	10	720	50
716		LG		lg	5		I	11	Wilkins Peak	mudstone	interior		overbank	mix	C	in		41.3421	-109.436	Firehole Canyon L	8.5		Wilkins Peak Member		18																		123.07	77880	2020	0	20	580	40
717		LG		lg	5		I	11	Wilkins Peak	mudstone	interior		overbank	mix	C	in		41.3421	-109.436	Firehole Canyon L	9		Wilkins Peak Member		18																		123.51	71630	1670	20	10	640	40
718		LG		lg	5		I	11	Wilkins Peak	mudstone	interior		overbank	mix	C	in		41.3421	-109.436	Firehole Canyon L	9.5		Wilkins Peak Member		19																		121.88	90370	2120	30	10	560	40
719		LG		lg	5		I	11	Wilkins Peak	mudstone	interior		overbank	mix	C	in		41.3421	-109.436	Firehole Canyon L	10		Wilkins Peak Member		19																		121.65	43300	1810	0	20	590	50
720		LG		lg	5		I	11	Wilkins Peak	mudstone	interior		overbank	mix	C	in		41.3421	-109.436	Firehole Canyon L	10.5		Wilkins Peak Member		18																		121.54	71650	1960	20	10	630	40
721		LG		lg	5		I	11	Wilkins Peak	mudstone	interior		overbank	mix	C	in		41.3421	-109.436	Firehole Canyon L	11		Wilkins Peak Member		19																		123.49	92830	2130	0	20	710	40
722		LG		lg	5		I	11	Wilkins Peak	mudstone	interior		overbank	mix	C	in		41.3421	-109.436	Firehole Canyon L	11.5		Wilkins Peak Member		18																		122.16	94340	2110	0	20	570	40
723		LG		lg	5		I	11	Wilkins Peak	mudstone	interior		overbank	mix	C	in		41.3421	-109.436	Firehole Canyon L	12.5		Wilkins Peak Member		18																		124.13	88420	2240	20	10	580	40
724		LG		lg	5		I	11	Wilkins Peak	mudstone	interior		overbank	mix	C	in		41.3421	-109.436	Firehole Canyon L	13		Wilkins Peak Member		18																		122.04	102580	2150	0	20	570	40
725		LG		lg	5		I	11	Wilkins Peak	mudstone	interior		overbank	mix	C	in		41.3421	-109.436	Firehole Canyon L	13.5		Wilkins Peak Member		18																		122.24	105330	2330	0	20	520	40
726		LG		lg	4			11	Wilkins Peak	carbonate	interior		palustrine	mix	C	in		41.3421	-109.436	Firehole Canyon L	14		Wilkins Peak Member		4																		122.83	14370	1160	60	10	300	30
727		LG		lg	3			11	Wilkins Peak	carbonate	interior		littoral	mix	C	in		41.3421	-109.436	Firehole Canyon L	14.5		Wilkins Peak Member		9																		121.88	25640	1870	0	20	710	50
728		LG		lg	5			11	Wilkins Peak	carbonate	interior		profundal	mix	C	in		41.3421	-109.436	Firehole Canyon L	15		Wilkins Peak Member		12																		122.75	51720	1880	0	20	1150	50
729		LG		lg	5			11	Wilkins Peak	carbonate	interior		profundal	mix	C	in		41.3421	-109.436	Firehole Canyon L	15.5		Wilkins Peak Member		13																		122.62	36230	1380	0	20	580	40
730		LG		lg	5			11	Wilkins Peak	carbonate	interior		profundal	mix	C	in		41.3421	-109.436	Firehole Canyon L	16		Wilkins Peak Member		13																		122.59	32560	1630	30	10	400	40
731		LG		lg	4			11	Wilkins Peak	carbonate	interior		palustrine	mix	C	in		41.3421	-109.436	Firehole Canyon L	16.5		Wilkins Peak Member		2																		123	62310	2260	20	10	470	40
732		LG		lg	3			11	Wilkins Peak	carbonate	interior		littoral	mix	C	in		41.3421	-109.436	Firehole Canyon L	17		Wilkins Peak Member		8																		122.71	51100	2350	20	10	580	40
733		LG		lg	5			11	Wilkins Peak	carbonate	interior		profundal	mix	C	in		41.3421	-109.436	Firehole Canyon L	17.5		Wilkins Peak Member		13																		121.53	41990	1920	0	20	520	40
734		LG		lg	5			11	Wilkins Peak	carbonate	interior		profundal	mix	C	in		41.3421	-109.436	Firehole Canyon L	18		Wilkins Peak Member		13																		120.68	45620	1950	0	20	400	40
735		LG		lg	4			11	Wilkins Peak	carbonate	interior		palustrine	mix	C	in		41.3421	-109.436	Firehole Canyon L	18.5		Wilkins Peak Member		1																		123.02	39240	1810	0	20	500	40
736		LG		lg	4			11	Wilkins Peak	carbonate	interior		palustrine	mix	C	in		41.3421	-109.436	Firehole Canyon L	19		Wilkins Peak Member		1																		121.59	33110	1670	20	10	420	40
737		LG		lg	3			37	Wilkins Peak	carbonate	periphery		littoral	mix	C	in		41.055	-109.497	Wildhorse Draw	0		Wilkins Peak Member		26	8.4	2.2	3.7	7														123.04	59050	1750	0	20	480	40
738		LG		lg	3			37	Wilkins Peak	carbonate	periphery		littoral	mix	C	in		41.055	-109.497	Wildhorse Draw	0.5		Wilkins Peak Member		26	7.8	2	3	7.8														122.1	38320	1490	0	20	450	40
739		LG		lg	-0.5	vc	I	37	Wilkins Peak	sandstone	periphery		fluvial	mix	C	in		41.055	-109.497	Wildhorse Draw	1		Wilkins Peak Member		29	3.7	0.7	1.7	3.2														121.01	36360	2260	40	10	330	50
740		LG		lg	-0.5	vc	I	37	Wilkins Peak	sandstone	periphery		fluvial	mix	C	in		41.055	-109.497	Wildhorse Draw	2		Wilkins Peak Member		28	3.2	0.4	2.9	3.9														122.87	27760	1670	0	20	260	40
741		LG		lg	-0.5	vc	I	37	Wilkins Peak	sandstone	periphery		fluvial	mix	C	in		41.055	-109.497	Wildhorse Draw	2.5		Wilkins Peak Member		29	3.3	0.5	2.5	2.4														153.08	24910	1390	0	20	220	40
742		LG		lg	2.5	f	I	37	Wilkins Peak	sandstone	periphery		overbank	mix	C	in		41.055	-109.497	Wildhorse Draw	3		Wilkins Peak Member		31	9.4	2.7	2.8	9.4														121.3	74160	1950	0	20	430	40
743		LG		lg	2.5	f	I	37	Wilkins Peak	sandstone	periphery		overbank	mix	C	in		41.055	-109.497	Wildhorse Draw	3.5		Wilkins Peak Member		31	7.5	2.2	3.6	3.9														127.88	50230	1550	0	20	400	40
744		LG		lg	2.5	f	I	37	Wilkins Peak	sandstone	periphery		overbank	mix	C	in		41.055	-109.497	Wildhorse Draw	4		Wilkins Peak Member		31	7.2	2	3.3	8.1														122.04	48550	1980	0	20	310	40
745		LG		lg	2.5	f	I	37	Wilkins Peak	sandstone	periphery		overbank	mix	C	in		41.055	-109.497	Wildhorse Draw	4.5		Wilkins Peak Member		31	7.6	2.3	2.8	6.7														122.26	56900	1600	0	20	330	30
746		LG		lg	3.5	vf	I	37	Wilkins Peak	sandstone	periphery		overbank	mix	C	in		41.055	-109.497	Wildhorse Draw	5		Wilkins Peak Member		31	8.5	2.2	4	6.7														122.64	58620	1940	0	20	390	40
747		LG		lg	5		I	37	Wilkins Peak	mudstone	periphery		overbank	mix	C	in		41.055	-109.497	Wildhorse Draw	5.5		Wilkins Peak Member		32	12.9	2.4	5.7	16.6														121.82	51560	1690	0	20	410	40
748		LG		lg	5		I	37	Wilkins Peak	mudstone	periphery		overbank	mix	C	in		41.055	-109.497	Wildhorse Draw	6		Wilkins Peak Member		32	7.2	1.7	4.3	3.9														120.98	71810	2060	0	20	490	40
749		LG		lg	5		I	37	Wilkins Peak	mudstone	periphery		overbank	mix	C	in		41.055	-109.497	Wildhorse Draw	6.5		Wilkins Peak Member		32	10.1	1.6	7.2	5.6														122.04	21260	1510	0	20	380	40
750		LG		lg	3			37	Wilkins Peak	carbonate	periphery		littoral	mix	C	in		41.055	-109.497	Wildhorse Draw	7		Wilkins Peak Member		26	6.8	1.2	5.4	4.9														121.1	54890	2050	20	10	530	40
751		LG		lg	3			37	Wilkins Peak	carbonate	periphery		littoral	mix	C	in		41.055	-109.497	Wildhorse Draw	7.5		Wilkins Peak Member		24	3.9	0.7	3.4	1.6														122.47	20940	1200	0	20	340	40
752		LG		lg	3.5	vf	I	37	Wilkins Peak	sandstone	periphery		littoral	mix	C	in		41.055	-109.497	Wildhorse Draw	8		Wilkins Peak Member		26	3.6	0.4	3.4	2.7														121.11	18770	1000	0	20	180	40
753		LG		lg	-0.5	vc	I	37	Wilkins Peak	sandstone	periphery		fluvial	mix	C	in		41.055	-109.497	Wildhorse Draw	8.5		Wilkins Peak Member		29	3.3	0.4	2.6	2.8														122.63	38130	1690	0	20	290	40
754		LG		lg	-0.5	vc	I	37	Wilkins Peak	sandstone	periphery		fluvial	mix	C	in		41.055	-109.497	Wildhorse Draw	9		Wilkins Peak Member		29	3.2	0.5	2.6	1.8														121.85	23400	1630	0	20	290	50
755		LG		lg	-0.5	vc	I	37	Wilkins Peak	sandstone	periphery		littoral	mix	C	in		41.055	-109.497	Wildhorse Draw	9.5		Wilkins Peak Member		28	3.2	0.4	2.4	1.9														120.77	46440	2250	20	10	250	40
756		LG		lg	-0.5	vc	I	37	Wilkins Peak	sandstone	periphery		fluvial	mix	C	in		41.055	-109.497	Wildhorse Draw	10		Wilkins Peak Member		30	2.8	0.3	2	1.4														121.45	21630	1290	0	20	240	40
757		LG		lg	1.5	m	I	37	Wilkins Peak	sandstone	periphery		fluvial	mix	C	in		41.055	-109.497	Wildhorse Draw	11		Wilkins Peak Member		30	4	1	2.2	3														122.19	17400	1160	0	20	250	40
758		LG		lg	3			37	Wilkins Peak	carbonate	periphery		littoral	mix	C	in		41.055	-109.497	Wildhorse Draw	11.5		Wilkins Peak Member		26	5.8	1.3	3.1	5														121.37	32950	1470	0	20	270	40
759		LG		lg	3			37	Wilkins Peak	carbonate	periphery		littoral	mix	C	in		41.055	-109.497	Wildhorse Draw	12		Wilkins Peak Member		26	4.9	0.7	2.1	5.2														121.74	62450	2090	0	20	440	40
760		LG		lg	4			16	Wilkins Peak	carbonate	periphery		palustrine	mix	C	in		41.0458	-109.443	Iron Mountain	0		Wilkins Peak Member		23	3.9	0.6	2.8	3.2														123.5	1820	540	0	20	0	40
761		LG		lg	3.5	vf	I	16	Wilkins Peak	sandstone	periphery		littoral	mix	C	in		41.0458	-109.443	Iron Mountain	0.5		Wilkins Peak Member		26	3.8	0.7	2.6	2.6														122.03	16910	1210	0	20	340	40
762		LG		lg	3.5	vf	I	16	Wilkins Peak	sandstone	periphery		littoral	mix	C	in		41.0458	-109.443	Iron Mountain	1		Wilkins Peak Member		26	4	0.7	2.1	5.3														121.36	24560	1580	0	20	390	40
763		LG		lg	3			16	Wilkins Peak	carbonate	periphery		littoral	mix	C	in		41.0458	-109.443	Iron Mountain	1.5		Wilkins Peak Member		24	5.4	0.9	3.7	4.5														121.37	23170	1650	0	20	450	50
764		LG		lg	3.5	vf	I	16	Wilkins Peak	sandstone	periphery		littoral	mix	C	in		41.0458	-109.443	Iron Mountain	2		Wilkins Peak Member		26	5.3	0.7	4	3.6														122.2	30470	1750	0	20	550	50
765		LG		lg	3.5	vf	I	16	Wilkins Peak	sandstone	periphery		littoral	mix	C	in		41.0458	-109.443	Iron Mountain	2.5		Wilkins Peak Member		26	4.7	0.7	3.8	2.9														121.84	19970	1400	0	20	440	40
766		LG		lg	3			16	Wilkins Peak	carbonate	periphery		littoral	mix	C	in		41.0458	-109.443	Iron Mountain	3.5		Wilkins Peak Member		26	6.5	0.5	5.5	5.3														121.3	36170	1910	0	20	480	40
767		LG		lg	3			16	Wilkins Peak	carbonate	periphery		littoral	mix	C	in		41.0458	-109.443	Iron Mountain	3		Wilkins Peak Member		26	4.9	0.9	2.7	4.6														121.25	18690	1320	0	20	360	40
768		LG		lg	-0.5	vc	I	16	Wilkins Peak	sandstone	periphery		fluvial	mix	C	in		41.0458	-109.443	Iron Mountain	4		Wilkins Peak Member		28	8.7	0.8	7.5	5.3														122.49	32540	1910	0	20	600	40
769		LG		lg	2.5	f	I	16	Wilkins Peak	sandstone	periphery		fluvial	mix	C	in		41.0458	-109.443	Iron Mountain	5		Wilkins Peak Member		30	2.4	0.4	1.8	1.9														122.65	19320	1010	0	20	300	40
770		LG		lg	5		I	16	Wilkins Peak	mudstone	periphery		overbank	mix	C	in		41.0458	-109.443	Iron Mountain	5.5		Wilkins Peak Member		32	2.2	0.6	0.9	3.1														122.06	11420	770	0	20	200	30
771		LG		lg	4			16	Wilkins Peak	carbonate	periphery		palustrine	mix	C	in		41.0458	-109.443	Iron Mountain	6		Wilkins Peak Member		23	2.4	0.4	1.5	3.4														121.88	22910	920	0	20	160	30
772		LG		lg	3.5	vc	I	16	Wilkins Peak	sandstone	periphery		fluvial	mix	C	in		41.0458	-109.443	Iron Mountain	6.5		Wilkins Peak Member		29	2.5	0.5	2.3	2.3														121.23	9190	910	0	20	250	40
773		LG		lg	1.5	m	I	16	Wilkins Peak	sandstone	periphery		fluvial	mix	C	in		41.0458	-109.443	Iron Mountain	7		Wilkins Peak Member		28	2.9	0.3	2.2	2.9														122.3	17830	1100	0	20	300	40
774		LG		lg	1.5	m	I	16	Wilkins Peak	sandstone	periphery		fluvial	mix	C	in		41.0458	-109.443	Iron Mountain	7.5		Wilkins Peak Member		30	2.6	0.3	2.2	3.6														122.18	18160	1330	0	20	320	40
775		LG		lg	1.5	m	I	16	Wilkins Peak	sandstone	periphery		overbank	mix	C	in		41.0458	-109.443	Iron Mountain	8.5		Wilkins Peak Member		31	3	0.6	1.8	2.9														122.47	18580	1140	0	20	200	40
776		LG		lg	1.5	m	I	16	Wilkins Peak	sandstone	periphery		overbank	mix	C	in		41.0458	-109.443	Iron Mountain	9		Wilkins Peak Member		31	3.2	0.9	1.9	3.4														122.42	19490	1130	0	20	200	40
777		LG		lg	0.5	c	I	16	Wilkins Peak	sandstone	periphery		fluvial	mix	C	in		41.0458	-109.443	Iron Mountain	9.5		Wilkins Peak Member		28	2.8	0.6	1.5	2														122.3	24790	1010	0	20	170	30
778		LG		lg	-0.5	vc	I	16	Wilkins Peak	sandstone	periphery		fluvial	mix	C	in		41.0458	-109.443	Iron Mountain	10		Wilkins Peak Member		28	6	0.7	5.8	4.2														121.19	15740	1110	0	20	250	40
779		LG		lg	-0.5	vc	I	16	Wilkins Peak	sandstone	periphery		fluvial	mix	C	in		41.0458	-109.443	Iron Mountain	10.5		Wilkins Peak Member		30	4.1	0.8	3	1.9														122.71	14200	1390	0	20	610	40
780		LG		lg	3			16	Wilkins Peak	carbonate	periphery		littoral	mix	C	in		41.0458	-109.443	Iron Mountain	11		Wilkins Peak Member		24	2.4	0.5	1.5	2.9														121.94	8290	1030	0	20	300	40
781		LG		lg	3			16	Wilkins Peak	carbonate	periphery		littoral	mix	C	in		41.0458	-109.443	Iron Mountain	11.5		Wilkins Peak Member		24	2.4	0.6	1.2	3														121.57	20810	1050	0	20	280	40
782		LG		lg	3			16	Wilkins Peak	carbonate	periphery		littoral	mix	C	in		41.0458	-109.443	Iron Mountain	12		Wilkins Peak Member		26	4.1	0.7	2.6	4.6														121.59	17270	820	0	20	210	30
783		LG		lg	4			67	Wilkins Peak	carbonate	interior		palustrine	mix	C	in		41.0723	-109.478	Sand Knoll	11		Wilkins Peak Member		1	11.2	2.3	5.7	11.4														122.06	33420	1740	0	20	590	40
784		LG		lg	4			67	Wilkins Peak	carbonate	interior		palustrine	mix	C	in		41.0723	-109.478	Sand Knoll	11.5		Wilkins Peak Member		2	14.9	2.6	9.5	14.7														120.53	51410	2210	0	20	700	40
785		LG		lg	4			67	Wilkins Peak	carbonate	interior		palustrine	mix	C	in		41.0723	-109.478	Sand Knoll	12		Wilkins Peak Member		1	6	1.8	3.1	2.9														122.9	14010	1520	20	10	560	40
786		LG		lg	4			67	Wilkins Peak	carbonate	interior		palustrine	mix	C	in		41.0723	-109.478	Sand Knoll	12.5		Wilkins Peak Member		1	5.7	1.9	2.1	4.2														122.91	20860	1690	0	20	620	40
787		LG		lg	4			67	Wilkins Peak	carbonate	interior		palustrine	mix	C	in		41.0723	-109.478	Sand Knoll	13		Wilkins Peak Member		1	7.2	2.8	3.3	3.9														122.26	37370	1940	0	20	590	40
788		LG		lg	5			67	Wilkins Peak	carbonate	interior		profundal	mix	C	in		41.0723	-109.478	Sand Knoll	13.5		Wilkins Peak Member		13	4.4	1.4	1.5	3														120.93	31840	1940	0	20	530	40
789		LG		lg	5			67	Wilkins Peak	carbonate	interior		profundal	mix	C	in		41.0723	-109.478	Sand Knoll	15.5		Wilkins Peak Member		12	6.3	1.7	3	5.1														121.79	36390	1740	0	20	500	40
790		LG		lg	5			67	Wilkins Peak	carbonate	interior		profundal	mix	C	in		41.0723	-109.478	Sand Knoll	14		Wilkins Peak Member		13	8.5	2.1	3.7	7.1														122.18	26010	1520	0	20	780	40
791		LG		lg	5			67	Wilkins Peak	carbonate	interior		profundal	mix	C	in		41.0723	-109.478	Sand Knoll	16		Wilkins Peak Member		12	4.9	1.4	2.6	5														122.64	49620	1600	0	20	440	40
792		LG		lg	5			7	Wilkins Peak	carbonate	interior		profundal	mix	C	in		41.4151	-109.464	Chicken Springs Draw	28		Wilkins Peak Member		12	5.5	1.9	2.5	4.4														124.34	37140	1810	0	20	490	40
793		LG		lg	5			67	Wilkins Peak	carbonate	interior		profundal	mix	C	in		41.0723	-109.478	Sand Knoll	0		Wilkins Peak Member		13	10	2.4	5.7	8.8														121.81	57140	2320	40	10	600	40
794		LG		lg	5			67	Wilkins Peak	carbonate	interior		profundal	mix	C	in		41.0723	-109.478	Sand Knoll	0.5		Wilkins Peak Member		13	7.5	1.7	4.6	5.3														121.18	24940	1570	0	20	780	40
795		LG		lg	4			67	Wilkins Peak	carbonate	interior		palustrine	mix	C	in		41.0723	-109.478	Sand Knoll	1		Wilkins Peak Member		1	6.7	2.1	3.2	3.4														122.64	38110	1630	0	20	550	40
796		LG		lg	3			67	Wilkins Peak	carbonate	interior		littoral	mix	C	in		41.0723	-109.478	Sand Knoll	1.5		Wilkins Peak Member		8	12.7	2.3	6.8	15.3														139.74	36610	1500	0	20	480	40
797		LG		lg	3			67	Wilkins Peak	carbonate	interior		littoral	mix	C	in		41.0723	-109.478	Sand Knoll	2		Wilkins Peak Member		8	9.3	1.8	4	10														123.07	51270	1850	0	20	710	40
798		LG		lg	5			67	Wilkins Peak	carbonate	interior		profundal	mix	C	in		41.0723	-109.478	Sand Knoll	2.5		Wilkins Peak Member		13	7.7	1.8	3.6	6.5														122.38	32270	1550	0	20	570	40
799		LG		lg	5			67	Wilkins Peak	carbonate	interior		profundal	mix	C	in		41.0723	-109.478	Sand Knoll	3		Wilkins Peak Member		13	10.3	2.2	5.8	10														121.91	15780	1210	0	20	550	40
800		LG		lg	3			67	Wilkins Peak	carbonate	interior		littoral	mix	C	in		41.0723	-109.478	Sand Knoll	3.5		Wilkins Peak Member		9	9.2	2.4	3.1	10.7														120.74	49060	1920	30	10	700	40
801		LG		lg	3			67	Wilkins Peak	carbonate	interior		littoral	mix	C	in		41.0723	-109.478	Sand Knoll	4.5		Wilkins Peak Member		8	6.4	1.6	2.5	4.9														122.97	41280	2050	0	20	480	40
802		LG		lg	3			67	Wilkins Peak	carbonate	interior		littoral	mix	C	in		41.0723	-109.478	Sand Knoll	5		Wilkins Peak Member		8	5.7	1.3	3.7	5														122.45	56330	2080	0	20	510	40
803		LG		lg	3			67	Wilkins Peak	carbonate	interior		littoral	mix	C	in		41.0723	-109.478	Sand Knoll	5.5		Wilkins Peak Member		8	6.7	1.5	3.7	6.1														122.55	41660	1900	0	20	820	40
804		LG		lg	5			67	Wilkins Peak	carbonate	interior		profundal	mix	C	in		41.0723	-109.478	Sand Knoll	6.5		Wilkins Peak Member		12	11	2.5	6.4	9.6														122.65	57550	1970	20	10	760	40
805		LG		lg	5			67	Wilkins Peak	carbonate	interior		profundal	mix	C	in		41.0723	-109.478	Sand Knoll	7		Wilkins Peak Member		12	9.7	2	5.3	9.4														126.79	58290	2180	0	20	600	40
806		LG		lg	5			67	Wilkins Peak	carbonate	interior		profundal	mix	C	in		41.0723	-109.478	Sand Knoll	7.5		Wilkins Peak Member		12	9.4	2.7	4.5	6.2														121.85	23200	1650	0	20	570	40
807		LG		lg	4			67	Wilkins Peak	carbonate	interior		palustrine	mix	C	in		41.0723	-109.478	Sand Knoll	8		Wilkins Peak Member		1	6.6	1.7	3	6														120	29590	1820	0	20	490	50
808		LG		lg	4			67	Wilkins Peak	carbonate	interior		palustrine	mix	C	in		41.0723	-109.478	Sand Knoll	8.5		Wilkins Peak Member		1	7.3	1.6	4.5	7.6														122.35	31670	1880	0	20	680	40
809		LG		lg	4			67	Wilkins Peak	carbonate	interior		palustrine	mix	C	in		41.0723	-109.478	Sand Knoll	9		Wilkins Peak Member		1	11.6	3.2	5	10.3														121.68	49250	1740	0	20	570	40
810		LG		lg	4			67	Wilkins Peak	carbonate	interior		palustrine	mix	C	in		41.0723	-109.478	Sand Knoll	9.5		Wilkins Peak Member		1	8.8	2.8	4.5	5.1														120.37	50600	2120	20	10	490	40
811		LG		lg	4			67	Wilkins Peak	carbonate	interior		palustrine	mix	C	in		41.0723	-109.478	Sand Knoll	10		Wilkins Peak Member		2	6.2	2.3	2.3	3.2														122.1	33040	1790	20	10	540	40
812		LG		lg	4			67	Wilkins Peak	carbonate	interior		palustrine	mix	C	in		41.0723	-109.478	Sand Knoll	10.5		Wilkins Peak Member		1	6	1.9	2.9	3.6														122	34890	1600	70	10	410	40
813		LG		lg	5			67	Wilkins Peak	carbonate	interior		profundal	mix	C	in		41.0723	-109.478	Sand Knoll	16.5		Wilkins Peak Member		12	6.9	1.4	3.8	7														123.44	45540	1960	20	10	560	40
814		LG		lg	5			67	Wilkins Peak	carbonate	interior		profundal	mix	C	in		41.0723	-109.478	Sand Knoll	17		Wilkins Peak Member		12	6.2	1.3	3.6	5.5														120.15	39340	1890	0	20	500	40
815		LG		lg	5			67	Wilkins Peak	carbonate	interior		profundal	mix	C	in		41.0723	-109.478	Sand Knoll	17.5		Wilkins Peak Member		12	6.5	1.6	3.2	5.9														121.29	49720	2100	0	20	540	40
816		LG		lg	5			67	Wilkins Peak	carbonate	interior		profundal	mix	C	in		41.0723	-109.478	Sand Knoll	18.5		Wilkins Peak Member		12	7.9	2.1	4.7	5.5														120.55	45610	2220	0	20	710	40
817		LG		lg	5			67	Wilkins Peak	carbonate	interior		profundal	mix	C	in		41.0723	-109.478	Sand Knoll	19		Wilkins Peak Member		12	6.8	1.8	2.8	7.4														121.09	47190	2040	0	20	560	40
818		LG		lg	5			67	Wilkins Peak	carbonate	interior		profundal	mix	C	in		41.0723	-109.478	Sand Knoll	19.5		Wilkins Peak Member		12	9.1	1.9	4.9	8.8														121.09	29570	1970	0	20	720	40
819		LG		lg	5			67	Wilkins Peak	carbonate	interior		profundal	mix	C	in		41.0723	-109.478	Sand Knoll	20		Wilkins Peak Member		12	6.3	1.5	3	5.3														129.5	36540	1900	0	20	610	40
820		LG		lg	3			67	Wilkins Peak	carbonate	interior		littoral	mix	C	in		41.0723	-109.478	Sand Knoll	20.5		Wilkins Peak Member		8	7.3	1.7	2.9	8														155.91	40790	1720	0	20	470	40
821		LG		lg	3			67	Wilkins Peak	carbonate	interior		littoral	mix	C	in		41.0723	-109.478	Sand Knoll	21		Wilkins Peak Member		8	8.1	1.8	4.4	8														120.27	48160	2270	0	20	5170	80
822		LG		lg	3			67	Wilkins Peak	carbonate	interior		littoral	mix	C	in		41.0723	-109.478	Sand Knoll	21.5		Wilkins Peak Member		8	5.9	1.5	3	4.5														121.12	57280	2130	50	10	620	40
823		LG		lg	5			67	Wilkins Peak	carbonate	interior		profundal	mix	C	in		41.0723	-109.478	Sand Knoll	22		Wilkins Peak Member		12	7.6	2.3	3.9	6.4														122.29	20570	1560	0	20	550	40
824		LG		lg	5			67	Wilkins Peak	carbonate	interior		profundal	mix	C	in		41.0723	-109.478	Sand Knoll	22.5		Wilkins Peak Member		12	7.5	2.2	2.8	6.1														121.63	25870	1710	0	20	770	50
825		LG		lg	5			67	Wilkins Peak	carbonate	interior		profundal	mix	C	in		41.0723	-109.478	Sand Knoll	23		Wilkins Peak Member		13	9.7	1.9	5.5	8.8														122	41340	1920	0	20	1010	50
826		LG		lg	3			67	Wilkins Peak	tuff	interior		tuff	mix	C	in		41.0723	-109.478	Sand Knoll	23.5		Wilkins Peak Member			5.9	1.7	3	4.4														120.16	48630	2170	20	10	780	50
827		LG		lg	5			67	Wilkins Peak	carbonate	interior		profundal	mix	C	in		41.0723	-109.478	Sand Knoll	24		Wilkins Peak Member		12	6.2	1.8	2.7	4.5														122.73	30010	1630	20	10	530	40
828		LG		lg	5			67	Wilkins Peak	carbonate	interior		profundal	mix	C	in		41.0723	-109.478	Sand Knoll	24.5		Wilkins Peak Member		12	7.6	1.6	5.5	7														123.6	49330	2180	0	20	660	40
829		LG		lg	5			67	Wilkins Peak	carbonate	interior		profundal	mix	C	in		41.0723	-109.478	Sand Knoll	25		Wilkins Peak Member		12	7.3	2	2.7	5.5														121.77	63560	2520	0	20	690	40
830		LG		lg	3			67	Wilkins Peak	carbonate	interior		littoral	mix	C	in		41.0723	-109.478	Sand Knoll	25.5		Wilkins Peak Member		8	6.2	1.7	3.5	4.3														120.69	40990	2240	0	20	840	50
831		LG		lg	4			67	Wilkins Peak	carbonate	interior		palustrine	mix	C	in		41.0723	-109.478	Sand Knoll	26		Wilkins Peak Member		1	6.1	1.6	3.8	4.9														120.57	39970	2000	20	10	840	40
832		LG		lg	4			67	Wilkins Peak	carbonate	interior		palustrine	mix	C	in		41.0723	-109.478	Sand Knoll	26.5		Wilkins Peak Member		2	8.9	2.4	4	8.1														119.67	36310	1840	0	20	610	40
833		LG		lg	4			67	Wilkins Peak	carbonate	interior		palustrine	mix	C	in		41.0723	-109.478	Sand Knoll	27		Wilkins Peak Member		3	7.7	2.2	3	5.6														121.56	36020	2120	0	20	750	40
834		LG		lg	4			67	Wilkins Peak	carbonate	interior		palustrine	mix	C	in		41.0723	-109.478	Sand Knoll	27.5		Wilkins Peak Member		4	7.4	2	3.3	6.8														121.37	16310	1550	0	20	560	50
835		LG		lg	3			67	Wilkins Peak	carbonate	interior		littoral	mix	C	in		41.0723	-109.478	Sand Knoll	28		Wilkins Peak Member		9	5.6	1.3	3.8	6.2														119.07	14800	1590	0	20	580	40
836		LG		lg	4			67	Wilkins Peak	carbonate	interior		palustrine	mix	C	in		41.0723	-109.478	Sand Knoll	28.5		Wilkins Peak Member		1	10.1	1.8	5.6	9.5														120.8	76970	3200	0	20	590	50
837		LG		lg	4			67	Wilkins Peak	carbonate	interior		palustrine	mix	C	in		41.0723	-109.478	Sand Knoll	29		Wilkins Peak Member		1	7.8	1.8	3.2	8.2														121.29	39840	1800	0	20	540	40
838		LG		lg	4			67	Wilkins Peak	carbonate	interior		palustrine	mix	C	in		41.0723	-109.478	Sand Knoll	29.5		Wilkins Peak Member		1	6.3	2.2	2.2	4.4														120.09	22610	1830	0	20	720	50
839		LG		lg	4			67	Wilkins Peak	carbonate	interior		palustrine	mix	C	in		41.0723	-109.478	Sand Knoll	30		Wilkins Peak Member		1	6.6	2.3	1.9	6.5														121.13	49650	1760	0	20	540	40
840		LG		lg	4			67	Wilkins Peak	carbonate	interior		palustrine	mix	C	in		41.0723	-109.478	Sand Knoll	30.5		Wilkins Peak Member		1	7	2.6	1.6	6.3														120.46	73430	2420	0	20	500	40
841		LG		lg	3			67	Wilkins Peak	carbonate	interior		littoral	mix	C	in		41.0723	-109.478	Sand Knoll	31		Wilkins Peak Member		8	7.2	2.4	2	6.5														121.08	27580	1860	0	20	590	50
842		LG		lg	3			67	Wilkins Peak	carbonate	interior		littoral	mix	C	in		41.0723	-109.478	Sand Knoll	31.5		Wilkins Peak Member		8	5.3	1.9	2.7	4.5														122.57	19730	1500	30	10	650	50
843		LG		lg	3			67	Wilkins Peak	carbonate	interior		littoral	mix	C	in		41.0723	-109.478	Sand Knoll	32		Wilkins Peak Member		8	4.6	1.2	2.3	3.8														120.94	75870	2510	0	20	530	40
844		LG		lg	3			67	Wilkins Peak	carbonate	interior		littoral	mix	C	in		41.0723	-109.478	Sand Knoll	32.5		Wilkins Peak Member		8	4.3	0.9	2.6	4.3														121.56	25550	1560	0	20	550	50
845		LG		lg	5			67	Wilkins Peak	carbonate	interior		profundal	mix	C	in		41.0723	-109.478	Sand Knoll	14.5		Wilkins Peak Member		12	10.9	2.8	6	8.3														121.52	25060	1590	20	10	550	40
846		LG		lg	5			67	Wilkins Peak	carbonate	interior		profundal	mix	C	in		41.0723	-109.478	Sand Knoll	15		Wilkins Peak Member		12	7	1.9	3.1	6.4														122.88	25050	1530	0	20	380	40
847		LG		lg	5			2	Wilkins Peak	carbonate	interior		profundal	mix	C	in		41.3565	-109.525	1 Blacks Fork	543.5		Wilkins Peak Member		12																		125	33960.8	1617.02	15.64	5.27	430.03	39.16
848		LG		lg	3			2	Wilkins Peak	carbonate	interior		littoral	mix	C	in		41.3565	-109.525	1 Blacks Fork	544		Wilkins Peak Member		10																		125	35526.6	1673.33	0	9.21	1549.61	44.38
849		LG		lg	5			2	Wilkins Peak	carbonate	interior		profundal	mix	C	in		41.3565	-109.525	1 Blacks Fork	544.5		Wilkins Peak Member		13																		125	39405.9	1656.15	14.1	5.05	409.67	37.87
850		LG		lg	5			2	Wilkins Peak	carbonate	interior		profundal	mix	C	in		41.3565	-109.525	1 Blacks Fork	545		Wilkins Peak Member		13																		125	37267.9	1661.79	0	8.56	480.66	38.52
851		LG		lg	5			2	Wilkins Peak	carbonate	interior		profundal	mix	C	in		41.3565	-109.525	1 Blacks Fork	545.5		Wilkins Peak Member		13																		125	48223.3	1629.18	0	10.21	352.56	34.37
852		LG		lg	3			2	Wilkins Peak	carbonate	interior		littoral	mix	C	in		41.3565	-109.525	1 Blacks Fork	546		Wilkins Peak Member		10																		125	29250	1279.11	8.56	4.46	291.37	30.77
853		LG		lg	4			2	Wilkins Peak	carbonate	interior		palustrine	mix	C	in		41.3565	-109.525	1 Blacks Fork	546.5		Wilkins Peak Member		2																		125	39780.3	1878.69	14.03	5.38	552.09	42.16
854		LG		lg	4			2	Wilkins Peak	carbonate	interior		palustrine	mix	C	in		41.3565	-109.525	1 Blacks Fork	547		Wilkins Peak Member		2																		125	45522.4	1907.38	0	11.54	573.66	40.8
855		LG		lg	4			2	Wilkins Peak	carbonate	interior		palustrine	mix	C	in		41.3565	-109.525	1 Blacks Fork	547.5		Wilkins Peak Member		2																		125	39761.7	2078.36	0	10.8	668.63	43.99
856		LG		lg	4			2	Wilkins Peak	carbonate	interior		palustrine	mix	C	in		41.3565	-109.525	1 Blacks Fork	548		Wilkins Peak Member		2																		125	32620	1818.32	0	8.01	832.57	45
857		LG		lg	4			2	Wilkins Peak	carbonate	interior		palustrine	mix	C	in		41.3565	-109.525	1 Blacks Fork	548.5		Wilkins Peak Member		2																		125	27198.2	1793.74	0	7.18	780.99	44.92
858		LG		lg	4			2	Wilkins Peak	carbonate	interior		palustrine	mix	C	in		41.3565	-109.525	1 Blacks Fork	549		Wilkins Peak Member		2																		125	34521.4	1817.21	0	11.09	1260.08	47.6
859		LG		lg	4			2	Wilkins Peak	carbonate	interior		palustrine	mix	C	in		41.3565	-109.525	1 Blacks Fork	549.5		Wilkins Peak Member		2																		125	28640.2	1619.92	0	7.91	760.38	42.22
860		LG		lg	4			2	Wilkins Peak	carbonate	interior		palustrine	mix	C	in		41.3565	-109.525	1 Blacks Fork	550		Wilkins Peak Member		2																		125	28524.1	1559.79	8.29	5.01	578.4	41.91
861		LG		lg	4			2	Wilkins Peak	carbonate	interior		palustrine	mix	C	in		41.3565	-109.525	1 Blacks Fork	550.5		Wilkins Peak Member		2																		125	38296.7	1913.98	9.34	5.44	1543.48	50.25
862		LG		lg	4			2	Wilkins Peak	carbonate	interior		palustrine	mix	C	in		41.3565	-109.525	1 Blacks Fork	551		Wilkins Peak Member		2																		125	50713.7	2060.07	25.13	6.08	495	39.35
863		LG		lg	4			2	Wilkins Peak	carbonate	interior		palustrine	mix	C	in		41.3565	-109.525	1 Blacks Fork	551.5		Wilkins Peak Member		2																		125	36994.6	1788.73	13.54	5.14	545.62	39.55
864		LG		lg	4			2	Wilkins Peak	carbonate	interior		palustrine	mix	C	in		41.3565	-109.525	1 Blacks Fork	552		Wilkins Peak Member		2																		125	22590	1651.09	18.3	5.42	540.77	42.76
865		LG		lg	4			2	Wilkins Peak	carbonate	interior		palustrine	mix	C	in		41.3565	-109.525	1 Blacks Fork	552.5		Wilkins Peak Member		2																		125	25683.9	1433.16	11.86	5.13	308.49	35.21
866		LG		lg	4			2	Wilkins Peak	carbonate	interior		palustrine	mix	C	in		41.3565	-109.525	1 Blacks Fork	553		Wilkins Peak Member		2																		125	21140	1201.12	24.23	5.49	252.11	31.89
867		LG		lg	2.5	f	I	2	Wilkins Peak	sandstone	interior		fluvial	mix	C	in		41.3565	-109.525	1 Blacks Fork	553.5		Wilkins Peak Member		15																		125	96965.9	2471.53	50.28	7.18	582.05	42.14
868		LG		lg	2.5	f	I	2	Wilkins Peak	sandstone	interior		fluvial	mix	C	in		41.3565	-109.525	1 Blacks Fork	554		Wilkins Peak Member		15																		125	109393	2364.3	42.74	7.3	649.35	41.89
869		LG		lg	2.5	f	I	2	Wilkins Peak	sandstone	interior		fluvial	mix	C	in		41.3565	-109.525	1 Blacks Fork	554.5		Wilkins Peak Member		15																		125	112737	2460.44	23.67	6.33	570.41	40.65
870		LG		lg	2.5	f	I	2	Wilkins Peak	sandstone	interior		fluvial	mix	C	in		41.3565	-109.525	1 Blacks Fork	555		Wilkins Peak Member		14																		125	104903	2481.97	0	8.96	1112.24	44.63
871		LG		lg	2.5	f	I	2	Wilkins Peak	sandstone	interior		fluvial	mix	C	in		41.3565	-109.525	1 Blacks Fork	555.5		Wilkins Peak Member		14																		125	93520.9	2374.97	10.04	5.57	681.96	42.44
872		LG		lg	5		I	2	Wilkins Peak	mudstone	interior		overbank	mix	C	in		41.3565	-109.525	1 Blacks Fork	556		Wilkins Peak Member		18																		125	53321.1	2320.29	10.93	5.78	524.08	42.35
873		LG		lg	5		I	2	Wilkins Peak	mudstone	interior		overbank	mix	C	in		41.3565	-109.525	1 Blacks Fork	556.5		Wilkins Peak Member		18																		125	49509.4	2338.16	9.43	5.38	555.54	41.49
874		LG		lg	5		I	2	Wilkins Peak	mudstone	interior		overbank	mix	C	in		41.3565	-109.525	1 Blacks Fork	557		Wilkins Peak Member		18																		125	97083.2	2537.87	10.62	5.88	622.19	43.34
875		LG		lg	5		I	2	Wilkins Peak	mudstone	interior		overbank	mix	C	in		41.3565	-109.525	1 Blacks Fork	557.5		Wilkins Peak Member		18																		125	71071.1	2486.11	0	11.52	471.77	38.24
876		LG		lg	5			2	Wilkins Peak	carbonate	interior		profundal	mix	C	in		41.3565	-109.525	1 Blacks Fork	558		Wilkins Peak Member		13																		125	98444.1	2503.17	22.08	5.75	549.95	41.18
877		LG		lg	5			2	Wilkins Peak	carbonate	interior		profundal	mix	C	in		41.3565	-109.525	1 Blacks Fork	558.5		Wilkins Peak Member		12																		125	101447	2365.81	16.39	5.91	1065.02	45.13
878		LG		lg	5		I	2	Wilkins Peak	mudstone	interior		overbank	mix	C	in		41.3565	-109.525	1 Blacks Fork	559		Wilkins Peak Member		21																		125	43024.7	2292	0	8.83	529.19	44.29
879		LG		lg	2.5	f	I	2	Wilkins Peak	sandstone	interior		littoral	mix	C	in		41.3565	-109.525	1 Blacks Fork	559.5		Wilkins Peak Member		16																		125	69194.9	2353.47	0	10.02	472.89	41.79
880		LG		lg	2.5	f	I	2	Wilkins Peak	sandstone	interior		overbank	mix	C	in		41.3565	-109.525	1 Blacks Fork	560		Wilkins Peak Member		17																		125	51731.1	2021.53	0	8.15	483.08	40.78
881		LG		lg	5		I	2	Wilkins Peak	mudstone	interior		overbank	mix	C	in		41.3565	-109.525	1 Blacks Fork	560.5		Wilkins Peak Member		18																		125	43854.4	1691.58	0	7.45	451.02	37.98
882		LG		lg	3			2	Wilkins Peak	carbonate	interior		littoral	mix	C	in		41.3565	-109.525	1 Blacks Fork	561		Wilkins Peak Member		10																		125	4345.81	1040.16	0	6.25	341.2	44.65
883		LG		lg	3			2	Wilkins Peak	carbonate	interior		littoral	mix	C	in		41.3565	-109.525	1 Blacks Fork	561.5		Wilkins Peak Member		10																		125	14771.8	1028.07	0	6.03	267.2	40.75
884		LG		lg	4			2	Wilkins Peak	carbonate	interior		palustrine	mix	C	in		41.3565	-109.525	1 Blacks Fork	562		Wilkins Peak Member		1																		125	49878.5	1623.03	8.71	4.76	600.39	36.6
885		LG		lg	4			2	Wilkins Peak	carbonate	interior		palustrine	mix	C	in		41.3565	-109.525	1 Blacks Fork	562.5		Wilkins Peak Member		1																		125	10812.8	1155.9	0	5.9	1482.88	47.69
886		LG		lg	4			2	Wilkins Peak	carbonate	interior		palustrine	mix	C	in		41.3565	-109.525	1 Blacks Fork	563		Wilkins Peak Member		1																		125	14330.4	988.91	0	6.49	538.22	38.07
887		LG		lg	4			2	Wilkins Peak	carbonate	interior		palustrine	mix	C	in		41.3565	-109.525	1 Blacks Fork	563.5		Wilkins Peak Member		3																		125	21488	1440.37	9.43	5.04	536.39	39.58
888		LG		lg	3			2	Wilkins Peak	carbonate	interior		littoral	mix	C	in		41.3565	-109.525	1 Blacks Fork	564		Wilkins Peak Member		10																		125	16354.8	1428.61	0	6.25	879.68	43.51
889		LG		lg	3			2	Wilkins Peak	carbonate	interior		littoral	mix	C	in		41.3565	-109.525	1 Blacks Fork	564.5		Wilkins Peak Member		10																		125	35190.5	1717.39	0	6.53	1420.27	45.28
890		LG		lg	5		I	2	Wilkins Peak	mudstone	interior		overbank	mix	C	in		41.3565	-109.525	1 Blacks Fork	565		Wilkins Peak Member		18																		125	14913.4	980.84	0	7.91	843.63	47.16
891		LG		lg	5		I	2	Wilkins Peak	mudstone	interior		overbank	mix	C	in		41.3565	-109.525	1 Blacks Fork	565.5		Wilkins Peak Member		18																		125	67006.8	2315.72	0	13.33	1382.38	49.8
892		LG		lg	5		I	2	Wilkins Peak	mudstone	interior		overbank	mix	C	in		41.3565	-109.525	1 Blacks Fork	566		Wilkins Peak Member		21																		125	78579.9	2508.14	0	11.18	905.21	45.12
893		LG		lg	5		I	2	Wilkins Peak	mudstone	interior		overbank	mix	C	in		41.3565	-109.525	1 Blacks Fork	566.5		Wilkins Peak Member		19																		125	47609.3	1781.78	0	7.75	633.69	40.73
894		LG		lg	5		I	2	Wilkins Peak	mudstone	interior		overbank	mix	C	in		41.3565	-109.525	1 Blacks Fork	567		Wilkins Peak Member		19																		125	63665.6	2147.37	0	11.88	599.24	42.03
895		LG		lg	5		I	2	Wilkins Peak	mudstone	interior		overbank	mix	C	in		41.3565	-109.525	1 Blacks Fork	567.5		Wilkins Peak Member		18																		124.07	49392.9	1745.2	0	9	614.23	42.71
896		LG		lg	5		I	2	Wilkins Peak	mudstone	interior		overbank	mix	C	in		41.3565	-109.525	1 Blacks Fork	568		Wilkins Peak Member		18																		125	39430.8	1864.05	0	8.48	916.36	44.76
897		LG		lg	5		I	2	Wilkins Peak	mudstone	interior		overbank	mix	C	in		41.3565	-109.525	1 Blacks Fork	568.5		Wilkins Peak Member		21																		125	42197	2311.04	11.12	5.51	444.14	37.99
898		LG		lg	2.5	f	I	2	Wilkins Peak	sandstone	interior		overbank	mix	C	in		41.3565	-109.525	1 Blacks Fork	569		Wilkins Peak Member		20																		125	90989.4	2031.71	15.33	6.06	765.7	40.57
899		LG		lg	2.5	f	I	2	Wilkins Peak	sandstone	interior		overbank	mix	C	in		41.3565	-109.525	1 Blacks Fork	569.5		Wilkins Peak Member		20																		125	98303.8	2150.67	10.49	5.74	551.74	41.51
900		LG		lg	2.5	f	I	2	Wilkins Peak	sandstone	interior		overbank	mix	C	in		41.3565	-109.525	1 Blacks Fork	570		Wilkins Peak Member		20																		125	54887.8	1447.66	13.38	5.44	724.39	41.81
901		LG		lg	5		I	2	Wilkins Peak	mudstone	interior		overbank	mix	C	in		41.3565	-109.525	1 Blacks Fork	570.5		Wilkins Peak Member		21																		125	30342.4	1012.05	11.82	6.04	589.16	40.14
902		LG		lg	5		I	2	Wilkins Peak	mudstone	interior		overbank	mix	C	in		41.3565	-109.525	1 Blacks Fork	571		Wilkins Peak Member		18																		125	98900.3	2331.27	39.63	7.29	729.07	42.83
903		LG		lg	5		I	2	Wilkins Peak	mudstone	interior		overbank	mix	C	in		41.3565	-109.525	1 Blacks Fork	571.5		Wilkins Peak Member		18																		125	107115	2530.23	25.66	6.19	569.94	41.46
904		LG		lg	2.5	f	I	2	Wilkins Peak	sandstone	interior		overbank	mix	C	in		41.3565	-109.525	1 Blacks Fork	572		Wilkins Peak Member		20																		125	93178.3	2253.7	40.03	7.12	992.26	45.54
905		LG		lg	2.5	f	I	2	Wilkins Peak	sandstone	interior		overbank	mix	C	in		41.3565	-109.525	1 Blacks Fork	572.5		Wilkins Peak Member		20																		125	65720.6	1678.92	0	13.19	850.85	45.27
906		LG		lg	2.5	f	I	2	Wilkins Peak	sandstone	interior		overbank	mix	C	in		41.3565	-109.525	1 Blacks Fork	573		Wilkins Peak Member		20																		125	79202.7	2179.59	0	9.25	1314.65	48.55
907		LG		lg	5		I	2	Wilkins Peak	mudstone	interior		overbank	mix	C	in		41.3565	-109.525	1 Blacks Fork	573.5		Wilkins Peak Member		18																		125	101417	2172.25	0	7.5	436.44	37.83
908		LG		lg	5		I	2	Wilkins Peak	mudstone	interior		overbank	mix	C	in		41.3565	-109.525	1 Blacks Fork	574		Wilkins Peak Member		18																		125	111679	2306.46	0	8.86	483.94	38.73
909		LG		lg	5		I	2	Wilkins Peak	mudstone	interior		overbank	mix	C	in		41.3565	-109.525	1 Blacks Fork	574.5		Wilkins Peak Member		21																		125	105970	2124.39	10.54	5.41	446.11	37.9
910		LG		lg	5		I	2	Wilkins Peak	mudstone	interior		overbank	mix	C	in		41.3565	-109.525	1 Blacks Fork	575		Wilkins Peak Member		19																		125	95661.6	2380.29	37.06	6.84	536.88	40.81
911		LG		lg	5		I	2	Wilkins Peak	mudstone	interior		overbank	mix	C	in		41.3565	-109.525	1 Blacks Fork	575.5		Wilkins Peak Member		19																		125	87289.9	2593.89	19.74	6.34	720.93	42.94
912		LG		lg	5		I	2	Wilkins Peak	mudstone	interior		overbank	mix	C	in		41.3565	-109.525	1 Blacks Fork	576		Wilkins Peak Member		21																		125	75780.4	1939.76	16.81	5.41	607.36	40.05
913		LG		lg	5		I	2	Wilkins Peak	mudstone	interior		overbank	mix	C	in		41.3565	-109.525	1 Blacks Fork	576.5		Wilkins Peak Member		18																		125	93739.5	2001.65	0	7.55	554.58	40.1
914		LG		lg	5		I	2	Wilkins Peak	mudstone	interior		overbank	mix	C	in		41.3565	-109.525	1 Blacks Fork	577		Wilkins Peak Member		18																		125	117904	2430.93	15.72	5.55	496.29	40.31
915		LG		lg	5		I	2	Wilkins Peak	mudstone	interior		overbank	mix	C	in		41.3565	-109.525	1 Blacks Fork	577.5		Wilkins Peak Member		18																		125	12654.8	681.78	0	11.49	401.5	44.03
916		LG		lg	5		I	2	Wilkins Peak	mudstone	interior		overbank	mix	C	in		41.3565	-109.525	1 Blacks Fork	578		Wilkins Peak Member		21																		125	64955.9	2297.64	0	12.85	489.05	40.87
917		LG		lg	5		I	2	Wilkins Peak	mudstone	interior		overbank	mix	C	in		41.3565	-109.525	1 Blacks Fork	578.5		Wilkins Peak Member		18																		125	114187	2336.8	0	8.27	487.39	37.95
918		LG		lg	5		I	2	Wilkins Peak	mudstone	interior		overbank	mix	C	in		41.3565	-109.525	1 Blacks Fork	579		Wilkins Peak Member		18																		125	62989.7	2379.14	0	13.34	658.98	43.48
919		LG		lg	5		I	2	Wilkins Peak	mudstone	interior		overbank	mix	C	in		41.3565	-109.525	1 Blacks Fork	579.5		Wilkins Peak Member		18																		125	60714.1	2376.54	0	10.2	1080.25	47.36
920		LG		lg	5		I	2	Wilkins Peak	mudstone	interior		overbank	mix	C	in		41.3565	-109.525	1 Blacks Fork	580		Wilkins Peak Member		18																		125	78392.9	2541.29	0	11.41	583.15	42.31
921		LG		lg	5		I	2	Wilkins Peak	mudstone	interior		overbank	mix	C	in		41.3565	-109.525	1 Blacks Fork	580.5		Wilkins Peak Member		18																		125	105344	2385.71	0	11.52	525.72	40.76
922		LG		lg	5		I	2	Wilkins Peak	mudstone	interior		overbank	mix	C	in		41.3565	-109.525	1 Blacks Fork	581		Wilkins Peak Member		19																		125	67174.9	2378.56	0	7.73	662.59	43.17
923		LG		lg	5		I	2	Wilkins Peak	mudstone	interior		overbank	mix	C	in		41.3565	-109.525	1 Blacks Fork	581.5		Wilkins Peak Member		19																		125	89763.4	2379.91	0	11.25	649.34	40.64
924		LG		lg	5		I	2	Wilkins Peak	mudstone	interior		overbank	mix	C	in		41.3565	-109.525	1 Blacks Fork	582		Wilkins Peak Member		19																		125	56846.2	2282.83	0	11.04	530.03	40.49
925		LG		lg	5		I	2	Wilkins Peak	mudstone	interior		overbank	mix	C	in		41.3565	-109.525	1 Blacks Fork	582.5		Wilkins Peak Member		19																		125	55054.9	1925.51	0	6.68	417.39	39.04
926		LG		lg	5		I	2	Wilkins Peak	mudstone	interior		overbank	mix	C	in		41.3565	-109.525	1 Blacks Fork	583		Wilkins Peak Member		19																		125	33176.7	1631.63	0	6.74	309.95	41.36
927		LG		lg	5		I	2	Wilkins Peak	mudstone	interior		overbank	mix	C	in		41.3565	-109.525	1 Blacks Fork	583.5		Wilkins Peak Member		18																		125	43923.1	1851.52	0	6.76	901.97	44.31
928		LG		lg	5		I	2	Wilkins Peak	mudstone	interior		overbank	mix	C	in		41.3565	-109.525	1 Blacks Fork	584		Wilkins Peak Member		18																		125	38505.4	1846.84	0	11.17	834.56	43.65
929		LG		lg	5		I	2	Wilkins Peak	mudstone	interior		overbank	mix	C	in		41.3565	-109.525	1 Blacks Fork	584.5		Wilkins Peak Member		18																		125	22378.2	1218.07	0	8.19	671.57	42.93
930		LG		lg	5		I	2	Wilkins Peak	mudstone	interior		overbank	mix	C	in		41.3565	-109.525	1 Blacks Fork	585		Wilkins Peak Member		18																		125	59912.8	2075.7	0	8.07	498.82	39.87
931		LG		lg	5		I	2	Wilkins Peak	mudstone	interior		overbank	mix	C	in		41.3565	-109.525	1 Blacks Fork	585.5		Wilkins Peak Member		18																		125	49032.7	2023.86	0	8.87	449.8	39.46
932		LG		lg	5		I	2	Wilkins Peak	mudstone	interior		overbank	mix	C	in		41.3565	-109.525	1 Blacks Fork	586		Wilkins Peak Member		18																		125	59005.2	2104.04	0	9.87	595.95	40.01
933		LG		lg	4			2	Wilkins Peak	carbonate	interior		palustrine	mix	C	in		41.3565	-109.525	1 Blacks Fork	586.5		Wilkins Peak Member		1																		125	35584.5	1430.76	0	8.27	1058.1	46.66
934		LG		lg	4			2	Wilkins Peak	carbonate	interior		palustrine	mix	C	in		41.3565	-109.525	1 Blacks Fork	587		Wilkins Peak Member		1																		125	51382.9	1685.96	9.21	5.47	1161.41	43.24
935		LG		lg	3			2	Wilkins Peak	tuff	interior		tuff	mix	C	in		41.3565	-109.525	1 Blacks Fork	587.5		Wilkins Peak Member																				125	73700.7	1860.45	0	6.81	380.48	37.37
936		LG		lg	4			2	Wilkins Peak	carbonate	interior		palustrine	mix	C	in		41.3565	-109.525	1 Blacks Fork	588		Wilkins Peak Member		1																		125	41941.8	1770.3	0	6.16	608.34	39.79
937		LG		lg	4			2	Wilkins Peak	carbonate	interior		palustrine	mix	C	in		41.3565	-109.525	1 Blacks Fork	588.5		Wilkins Peak Member		2																		125	46000.4	1888.07	0	8.17	680.76	42.38
938		LG		lg	4			2	Wilkins Peak	carbonate	interior		palustrine	mix	C	in		41.3565	-109.525	1 Blacks Fork	589		Wilkins Peak Member		1																		125	35293.8	1548.51	0	8.08	499.86	42.02
939		LG		lg	4			2	Wilkins Peak	carbonate	interior		palustrine	mix	C	in		41.3565	-109.525	1 Blacks Fork	589.5		Wilkins Peak Member		1																		125	93794.3	2420.06	0	7.17	430.98	35.56
940		LG		lg	5			2	Wilkins Peak	carbonate	interior		profundal	mix	C	in		41.3565	-109.525	1 Blacks Fork	590		Wilkins Peak Member		12																		125	37861.1	1667.99	15.87	5.24	659.25	39.88
941		LG		lg	5			2	Wilkins Peak	carbonate	interior		profundal	mix	C	in		41.3565	-109.525	1 Blacks Fork	590.5		Wilkins Peak Member		12																		125	28376.3	1771.92	0	6.64	622.82	42.52
942		LG		lg	5			2	Wilkins Peak	carbonate	interior		profundal	mix	C	in		41.3565	-109.525	1 Blacks Fork	591		Wilkins Peak Member		13																		123.3	37419.1	1560.26	13.08	5.57	557.6	40.24
943		LG		lg	5			2	Wilkins Peak	carbonate	interior		profundal	mix	C	in		41.3565	-109.525	1 Blacks Fork	591.5		Wilkins Peak Member		13																		125	48138.7	1708.02	14.42	5.51	442.83	36.76
944		LG		lg	5			2	Wilkins Peak	carbonate	interior		profundal	mix	C	in		41.3565	-109.525	1 Blacks Fork	592		Wilkins Peak Member		13																		125	32841.3	1360.68	8.28	5.41	411.87	34.89
945		LG		lg	5			2	Wilkins Peak	carbonate	interior		profundal	mix	C	in		41.3565	-109.525	1 Blacks Fork	592.5		Wilkins Peak Member		13																		125	28726.7	1371.96	0	10.2	299.16	34.8
946		LG		lg	5			2	Wilkins Peak	carbonate	interior		profundal	mix	C	in		41.3565	-109.525	1 Blacks Fork	593		Wilkins Peak Member		13																		125	24990.3	1607.11	57.97	7.82	368.92	42.03
947		LG		lg	5			2	Wilkins Peak	carbonate	interior		profundal	mix	C	in		41.3565	-109.525	1 Blacks Fork	593.5		Wilkins Peak Member		12																		125	29632.3	1459.29	10.62	5.44	417.43	39.16
948		LG		lg	5			2	Wilkins Peak	carbonate	interior		profundal	mix	C	in		41.3565	-109.525	1 Blacks Fork	594		Wilkins Peak Member		12																		125	16518.7	1055.94	0	7.91	517.46	47.28
949		LG		lg	5			2	Wilkins Peak	carbonate	interior		profundal	mix	C	in		41.3565	-109.525	1 Blacks Fork	594.5		Wilkins Peak Member		11																		125	24750.4	1471.16	18.06	5.63	406.99	38.73
950		LG		lg	5			2	Wilkins Peak	carbonate	interior		profundal	mix	C	in		41.3565	-109.525	1 Blacks Fork	595		Wilkins Peak Member		12																		125	20337.6	1457.8	15.38	5.77	456.39	40.57
951		LG		lg	5			2	Wilkins Peak	carbonate	interior		profundal	mix	C	in		41.3565	-109.525	1 Blacks Fork	595.5		Wilkins Peak Member		12																		125	28525.6	1536.92	76.56	7.2	350.4	38.01
952		LG		lg	5			2	Wilkins Peak	carbonate	interior		profundal	mix	C	in		41.3565	-109.525	1 Blacks Fork	596		Wilkins Peak Member		11																		125	19192.7	1406.49	0	8.38	294.19	38.44
953		LG		lg	5			2	Wilkins Peak	carbonate	interior		profundal	mix	C	in		41.3565	-109.525	1 Blacks Fork	596.5		Wilkins Peak Member		12																		125	20256.4	1469.71	0	7.04	326.86	39.68
954		LG		lg	5			2	Wilkins Peak	carbonate	interior		profundal	mix	C	in		41.3565	-109.525	1 Blacks Fork	597		Wilkins Peak Member		11																		125	19392.8	1421.93	0	6.6	887.34	43.79
955		LG		lg	5			2	Wilkins Peak	carbonate	interior		profundal	mix	C	in		41.3565	-109.525	1 Blacks Fork	597.5		Wilkins Peak Member		12																		125	22104.7	1212.14	0	8.72	519.87	40.43
956		LG		lg	5			2	Wilkins Peak	carbonate	interior		profundal	mix	C	in		41.3565	-109.525	1 Blacks Fork	598		Wilkins Peak Member		12																		125	38445.6	1613.42	0	7.24	342.27	36.61
957		LG		lg	5			2	Wilkins Peak	carbonate	interior		profundal	mix	C	in		41.3565	-109.525	1 Blacks Fork	598.5		Wilkins Peak Member		12																		125	48207.5	1424.72	0	12.09	369.82	33.8
958		LG		lg	5			2	Wilkins Peak	carbonate	interior		profundal	mix	C	in		41.3565	-109.525	1 Blacks Fork	599		Wilkins Peak Member		12																		125	60515.5	1598.23	11.37	5.75	327.26	34.38
959		LG		lg	5			2	Wilkins Peak	carbonate	interior		profundal	mix	C	in		41.3565	-109.525	1 Blacks Fork	599.5		Wilkins Peak Member		12																		125	50128.6	1674.59	0	9.11	445.95	38.58
960		LG		lg	5			2	Wilkins Peak	carbonate	interior		profundal	mix	C	in		41.3565	-109.525	1 Blacks Fork	600		Wilkins Peak Member		12																		125	26863.7	1171.57	0	8.43	361.03	45.51
961		LG		lg	5			2	Wilkins Peak	carbonate	interior		profundal	mix	C	in		41.3565	-109.525	1 Blacks Fork	600.5		Wilkins Peak Member		12																		125	13353	1067.41	0	7.31	347.01	51.51
962		LG		lg	5			2	Wilkins Peak	carbonate	interior		profundal	mix	C	in		41.3565	-109.525	1 Blacks Fork	601		Wilkins Peak Member		12																		125	36010.4	1666.65	0	10.79	316.19	37.86
963		LG		lg	5			2	Wilkins Peak	carbonate	interior		profundal	mix	C	in		41.3565	-109.525	1 Blacks Fork	601.5		Wilkins Peak Member		12																		125	44992.5	1682.85	0	9.28	292.78	36.72
964		LG		lg	5			2	Wilkins Peak	carbonate	interior		profundal	mix	C	in		41.3565	-109.525	1 Blacks Fork	602		Wilkins Peak Member		13																		125	40336.2	1680.53	0	10.27	287.18	36.35
965		LG		lg	5			2	Wilkins Peak	carbonate	interior		profundal	mix	C	in		41.3565	-109.525	1 Blacks Fork	602.5		Wilkins Peak Member		13																		125	26055	1475.21	0	8.63	321.95	39.14
966		LG		lg	5			2	Wilkins Peak	carbonate	interior		profundal	mix	C	in		41.3565	-109.525	1 Blacks Fork	603		Wilkins Peak Member		13																		125	37024.8	1680.92	0	6.22	928.03	39.35
967		LG		lg	3			2	Wilkins Peak	tuff	interior		tuff	mix	C	in		41.3565	-109.525	1 Blacks Fork	603.5		Wilkins Peak Member																				125	62817.4	2115.44	0	9.95	462.5	36.44
968		LG		lg	5			2	Wilkins Peak	carbonate	interior		profundal	mix	C	in		41.3565	-109.525	1 Blacks Fork	604		Wilkins Peak Member		13																		125	10936.2	1284.28	0	5.55	490.52	40.32
969		LG		lg	5			2	Wilkins Peak	carbonate	interior		profundal	mix	C	in		41.3565	-109.525	1 Blacks Fork	604.5		Wilkins Peak Member		13																		125	6309.3	599.83	0	6.71	1002.09	40.67
970		LG		lg	5			2	Wilkins Peak	carbonate	interior		profundal	mix	C	in		41.3565	-109.525	1 Blacks Fork	605		Wilkins Peak Member		13																		125	28413	1277.4	0	5.4	247.89	31.93
971		LG		lg	5			2	Wilkins Peak	carbonate	interior		profundal	mix	C	in		41.3565	-109.525	1 Blacks Fork	605.5		Wilkins Peak Member		11																		125	24927.9	1390.35	0	5.72	240.13	36.71
972		LG		lg	5			2	Wilkins Peak	carbonate	interior		profundal	mix	C	in		41.3565	-109.525	1 Blacks Fork	606		Wilkins Peak Member		11																		125	34348.8	1444.5	0	6.37	307.85	35.44
973		LG		lg	4			2	Wilkins Peak	carbonate	interior		palustrine	mix	C	in		41.3565	-109.525	1 Blacks Fork	606.5		Wilkins Peak Member		1																		125	27218.2	1411.53	0	6.73	243.87	35.67
974		LG		lg	4			2	Wilkins Peak	carbonate	interior		palustrine	mix	C	in		41.3565	-109.525	1 Blacks Fork	607		Wilkins Peak Member		1																		125	7406.59	1181.54	0	7.93	2071.49	55.86
975		LG		lg	4			2	Wilkins Peak	carbonate	interior		palustrine	mix	C	in		41.3565	-109.525	1 Blacks Fork	607.5		Wilkins Peak Member		1																		125	37801.6	1545.55	0	7.27	377.49	35.68
976		LG		lg	4			2	Wilkins Peak	carbonate	interior		palustrine	mix	C	in		41.3565	-109.525	1 Blacks Fork	608		Wilkins Peak Member		1																		125	13511.9	912.94	0	10.19	291.43	36.88
977		LG		lg	4			2	Wilkins Peak	carbonate	interior		palustrine	mix	C	in		41.3565	-109.525	1 Blacks Fork	608.5		Wilkins Peak Member		1																		125	17020.5	1347	0	10.23	349.54	38.37
978		LG		lg	3			2	Wilkins Peak	carbonate	interior		littoral	mix	C	in		41.3565	-109.525	1 Blacks Fork	609		Wilkins Peak Member		8																		125	15948.9	1381.59	0	9.68	336.26	39.98
979		LG		lg	5			2	Wilkins Peak	carbonate	interior		profundal	mix	C	in		41.3565	-109.525	1 Blacks Fork	609.5		Wilkins Peak Member		13																		125	18222.7	1410.2	0	8.07	367.43	37.57
980		LG		lg	5			2	Wilkins Peak	carbonate	interior		profundal	mix	C	in		41.3565	-109.525	1 Blacks Fork	610		Wilkins Peak Member		13																		125	14984.5	1291.11	0	7.47	359.77	38.5
981		LG		lg	5			2	Wilkins Peak	carbonate	interior		profundal	mix	C	in		41.3565	-109.525	1 Blacks Fork	610.5		Wilkins Peak Member		13																		125	28124.6	1644.71	0	8.21	392.03	37.16
982		LG		lg	5			2	Wilkins Peak	carbonate	interior		profundal	mix	C	in		41.3565	-109.525	1 Blacks Fork	611		Wilkins Peak Member		13																		125	17541.1	1025.4	8.15	4.18	220.9	30.26
983		LG		lg	4			3	Wilkins Peak	carbonate	interior		palustrine	mix	C	in		41.1959	-109.436	1 Currant Creek Ridge	695		Wilkins Peak Member		2																		125	16401	1095.23	0	9.26	556.66	50.9
984		LG		lg	4			3	Wilkins Peak	carbonate	interior		palustrine	mix	C	in		41.1959	-109.436	1 Currant Creek Ridge	694.5		Wilkins Peak Member		2																		125	10309.4	1046.23	0	8.88	571.52	62.74
985		LG		lg	4			3	Wilkins Peak	carbonate	interior		palustrine	mix	C	in		41.1959	-109.436	1 Currant Creek Ridge	694		Wilkins Peak Member		2																		125	31749.6	1534.49	7.44	4.92	545.04	40.2
986		LG		lg	4			3	Wilkins Peak	carbonate	interior		palustrine	mix	C	in		41.1959	-109.436	1 Currant Creek Ridge	693.5		Wilkins Peak Member		1																		125	50147.9	1826.95	12.92	5.3	508.85	38.29
987		LG		lg	4			3	Wilkins Peak	carbonate	interior		palustrine	mix	C	in		41.1959	-109.436	1 Currant Creek Ridge	693		Wilkins Peak Member		1																		125	32603	1928.6	0	10.58	882.61	43.85
988		LG		lg	4			3	Wilkins Peak	carbonate	interior		palustrine	mix	C	in		41.1959	-109.436	1 Currant Creek Ridge	692.5		Wilkins Peak Member		1																		125	38323.2	1709.82	8.26	5.01	549.6	41.13
989		LG		lg	4			3	Wilkins Peak	carbonate	interior		palustrine	mix	C	in		41.1959	-109.436	1 Currant Creek Ridge	692		Wilkins Peak Member		1																		125	16386.2	1725.77	0	7.86	915.79	49.26
990		LG		lg	4			3	Wilkins Peak	carbonate	interior		palustrine	mix	C	in		41.1959	-109.436	1 Currant Creek Ridge	691.5		Wilkins Peak Member		1																		125	25201.2	1470.76	9.02	5.25	731.17	45.84
991		LG		lg	3			3	Wilkins Peak	carbonate	interior		littoral	mix	C	in		41.1959	-109.436	1 Currant Creek Ridge	691		Wilkins Peak Member		10																		125	32883	1945.75	13.53	6.33	1574.02	50.81
992		LG		lg	4			3	Wilkins Peak	carbonate	interior		palustrine	mix	C	in		41.1959	-109.436	1 Currant Creek Ridge	690.5		Wilkins Peak Member		1																		125	27548.1	1628	11	5.21	615.8	40.22
993		LG		lg	5		I	3	Wilkins Peak	mudstone	interior		overbank	mix	C	in		41.1959	-109.436	1 Currant Creek Ridge	690		Wilkins Peak Member		18																		125	28703.9	1750.02	15.86	5.52	755.9	45.19
994		LG		lg	5		I	3	Wilkins Peak	mudstone	interior		overbank	mix	C	in		41.1959	-109.436	1 Currant Creek Ridge	689.5		Wilkins Peak Member		18																		125	23907.8	1488.22	20.65	5.81	526.28	43.41
995		LG		lg	4			3	Wilkins Peak	carbonate	interior		palustrine	mix	C	in		41.1959	-109.436	1 Currant Creek Ridge	689		Wilkins Peak Member		1																		125	44033	2064.23	34.18	6.14	532.51	41.16
996		LG		lg	5		I	3	Wilkins Peak	mudstone	interior		overbank	mix	C	in		41.1959	-109.436	1 Currant Creek Ridge	688.5		Wilkins Peak Member		18																		125	78082.3	2251.85	88.7	7.92	451.69	41.63
997		LG		lg	3			3	Wilkins Peak	carbonate	interior		littoral	mix	C	in		41.1959	-109.436	1 Currant Creek Ridge	688		Wilkins Peak Member		10																		125	13455.1	1455.12	29.46	5.98	606.54	39.96
998		LG		lg	5			3	Wilkins Peak	carbonate	interior		profundal	mix	C	in		41.1959	-109.436	1 Currant Creek Ridge	687.5		Wilkins Peak Member		13																		125	28497.4	1614.22	0	7.96	808.87	45.33
999		LG		lg	5			3	Wilkins Peak	carbonate	interior		profundal	mix	C	in		41.1959	-109.436	1 Currant Creek Ridge	687		Wilkins Peak Member		13																		125	45754.4	1917.47	0	8.48	711.88	40.98
1000		LG		lg	5			3	Wilkins Peak	carbonate	interior		profundal	mix	C	in		41.1959	-109.436	1 Currant Creek Ridge	686.5		Wilkins Peak Member		13																		125	53236.4	2121.39	0	7.09	490.96	40.22
1001		LG		lg	5			3	Wilkins Peak	carbonate	interior		profundal	mix	C	in		41.1959	-109.436	1 Currant Creek Ridge	686		Wilkins Peak Member		13																		125	84515	2585.69	0	9.52	591.61	40.63
1002		LG		lg	5			3	Wilkins Peak	carbonate	interior		profundal	mix	C	in		41.1959	-109.436	1 Currant Creek Ridge	685.5		Wilkins Peak Member		13																		125	16920.4	1497.03	0	8.08	563.3	48.14
1003		LG		lg	5			3	Wilkins Peak	carbonate	interior		profundal	mix	C	in		41.1959	-109.436	1 Currant Creek Ridge	685		Wilkins Peak Member		11																		125	16818.2	1543.03	0	8.25	655.13	43.45
1004		LG		lg	5			3	Wilkins Peak	carbonate	interior		profundal	mix	C	in		41.1959	-109.436	1 Currant Creek Ridge	684.5		Wilkins Peak Member		11																		125	53969.3	2049.04	0	8.03	1071.95	40.95
1005		LG		lg	5			3	Wilkins Peak	carbonate	interior		profundal	mix	C	in		41.1959	-109.436	1 Currant Creek Ridge	684		Wilkins Peak Member		11																		125	51453.8	2121.12	11.66	5.95	559.61	39.98
1006		LG		lg	5			3	Wilkins Peak	carbonate	interior		profundal	mix	C	in		41.1959	-109.436	1 Currant Creek Ridge	683.5		Wilkins Peak Member		11																		125	66037.6	2547.15	12.75	6.58	715.35	42.62
1007		LG		lg	4			3	Wilkins Peak	carbonate	interior		palustrine	mix	C	in		41.1959	-109.436	1 Currant Creek Ridge	683		Wilkins Peak Member		1																		125	46467.9	1667.38	0	8.31	588.19	36.17
1008		LG		lg	4			3	Wilkins Peak	carbonate	interior		palustrine	mix	C	in		41.1959	-109.436	1 Currant Creek Ridge	682.5		Wilkins Peak Member		1																		125	37498.9	1710.92	0	6.21	605.36	40.68
1009		LG		lg	4			3	Wilkins Peak	carbonate	interior		palustrine	mix	C	in		41.1959	-109.436	1 Currant Creek Ridge	682		Wilkins Peak Member		1																		125	36178.7	1547.11	0	7.07	513.51	38.71
1010		LG		lg	4			3	Wilkins Peak	carbonate	interior		palustrine	mix	C	in		41.1959	-109.436	1 Currant Creek Ridge	681.5		Wilkins Peak Member		1																		125	14410	1144.86	0	9.26	511.46	56.03
1011		LG		lg	4			3	Wilkins Peak	carbonate	interior		palustrine	mix	C	in		41.1959	-109.436	1 Currant Creek Ridge	681		Wilkins Peak Member		1																		125	41897.9	1934.02	0	7.94	639.36	39.97
1012		LG		lg	3			3	Wilkins Peak	carbonate	interior		littoral	mix	C	in		41.1959	-109.436	1 Currant Creek Ridge	680.5		Wilkins Peak Member		8																		125	34510.9	1751.96	7.85	4.89	643.44	40.65
1013		LG		lg	3			3	Wilkins Peak	carbonate	interior		littoral	mix	C	in		41.1959	-109.436	1 Currant Creek Ridge	680		Wilkins Peak Member		8																		125	30634	1770.54	0	7.37	888.94	45.94
1014		LG		lg	5			3	Wilkins Peak	carbonate	interior		profundal	mix	C	in		41.1959	-109.436	1 Currant Creek Ridge	679.5		Wilkins Peak Member		13																		125	29212.5	1143.13	0	9.56	306.76	29.3
1015		LG		lg	5			3	Wilkins Peak	carbonate	interior		profundal	mix	C	in		41.1959	-109.436	1 Currant Creek Ridge	679		Wilkins Peak Member		13																		125	50390.5	1687.49	0	11.97	445.93	34.79
1016		LG		lg	5			3	Wilkins Peak	carbonate	interior		profundal	mix	C	in		41.1959	-109.436	1 Currant Creek Ridge	678.5		Wilkins Peak Member		13																		125	16164.9	1080.85	0	8.55	500.74	47.26
1017		LG		lg	4			3	Wilkins Peak	carbonate	interior		palustrine	mix	C	in		41.1959	-109.436	1 Currant Creek Ridge	678		Wilkins Peak Member		1																		125	28266.6	1585.5	0	7.72	528.59	40.3
1018		LG		lg	4			3	Wilkins Peak	carbonate	interior		palustrine	mix	C	in		41.1959	-109.436	1 Currant Creek Ridge	677.5		Wilkins Peak Member		1																		125	19155.8	1567.07	0	7.46	535.64	41.35
1019		LG		lg	5			3	Wilkins Peak	carbonate	interior		profundal	mix	C	in		41.1959	-109.436	1 Currant Creek Ridge	677		Wilkins Peak Member		11																		125	14352.5	1370.65	0	7.01	431.56	47.78
1020		LG		lg	3			3	Wilkins Peak	tuff	interior		tuff	mix	C	in		41.1959	-109.436	1 Currant Creek Ridge	676.5		Wilkins Peak Member																				125	31071.7	1514.74	0	10.65	532.86	47.56
1021		LG		lg	4			3	Wilkins Peak	carbonate	interior		palustrine	mix	C	in		41.1959	-109.436	1 Currant Creek Ridge	676		Wilkins Peak Member		2																		125	40443.8	1704.39	0	6.77	511.1	44.39
1022		LG		lg	4			3	Wilkins Peak	carbonate	interior		palustrine	mix	C	in		41.1959	-109.436	1 Currant Creek Ridge	675.5		Wilkins Peak Member		2																		125	20989.4	1641.28	0	10.91	591.33	46.84
1023		LG		lg	4			3	Wilkins Peak	carbonate	interior		palustrine	mix	C	in		41.1959	-109.436	1 Currant Creek Ridge	675		Wilkins Peak Member		2																		125	72999.8	2253.07	13.99	7.64	695.86	38.93
1024		LG		lg	4			3	Wilkins Peak	carbonate	interior		palustrine	mix	C	in		41.1959	-109.436	1 Currant Creek Ridge	674.5		Wilkins Peak Member		1																		125	32742.6	1616.43	0	9.81	863.34	42.28
1025		LG		lg	4			3	Wilkins Peak	carbonate	interior		palustrine	mix	C	in		41.1959	-109.436	1 Currant Creek Ridge	674		Wilkins Peak Member		1																		125	39909.8	1898.13	0	7	654.94	42.25
1026		LG		lg	4			3	Wilkins Peak	carbonate	interior		palustrine	mix	C	in		41.1959	-109.436	1 Currant Creek Ridge	673.5		Wilkins Peak Member		1																		125	26266.6	1731.13	0	9.76	964.04	51.16
1027		LG		lg	4			3	Wilkins Peak	carbonate	interior		palustrine	mix	C	in		41.1959	-109.436	1 Currant Creek Ridge	673		Wilkins Peak Member		1																		125	42304.4	1806.49	24.15	8.17	904.03	41.76
1028		LG		lg	5		I	3	Wilkins Peak	mudstone	interior		overbank	mix	C	in		41.1959	-109.436	1 Currant Creek Ridge	672.5		Wilkins Peak Member		21																		125	72198.7	1945.63	26.66	8.22	491.96	36.06
1029		LG		lg	5		I	3	Wilkins Peak	mudstone	interior		overbank	mix	C	in		41.1959	-109.436	1 Currant Creek Ridge	672		Wilkins Peak Member		18																		125	68866.1	2227.01	0	12.76	592.7	42.58
1030		LG		lg	5		I	3	Wilkins Peak	mudstone	interior		overbank	mix	C	in		41.1959	-109.436	1 Currant Creek Ridge	671.5		Wilkins Peak Member		18																		125	99098.2	2565.8	12.91	5.59	570.53	41.23
1031		LG		lg	5		I	3	Wilkins Peak	mudstone	interior		overbank	mix	C	in		41.1959	-109.436	1 Currant Creek Ridge	671		Wilkins Peak Member		21																		125	88978.9	1868.45	0	11.67	457.35	41.98
1032		LG		lg	5		I	3	Wilkins Peak	mudstone	interior		overbank	mix	C	in		41.1959	-109.436	1 Currant Creek Ridge	670.5		Wilkins Peak Member		21																		125	100486	2233.18	12.68	6.58	466.34	41.53
1033		LG		lg	5		I	3	Wilkins Peak	mudstone	interior		overbank	mix	C	in		41.1959	-109.436	1 Currant Creek Ridge	670		Wilkins Peak Member		19																		125	124921	2617.22	0	8.98	561.47	38.17
1034		LG		lg	5		I	3	Wilkins Peak	mudstone	interior		overbank	mix	C	in		41.1959	-109.436	1 Currant Creek Ridge	669.5		Wilkins Peak Member		19																		125	80291.3	1900.6	0	8.05	652.64	46.11
1035		LG		lg	5		I	3	Wilkins Peak	mudstone	interior		overbank	mix	C	in		41.1959	-109.436	1 Currant Creek Ridge	669		Wilkins Peak Member		19																		125	98863.8	2224.69	0	8.84	528.37	44.32
1036		LG		lg	5		I	3	Wilkins Peak	mudstone	interior		overbank	mix	C	in		41.1959	-109.436	1 Currant Creek Ridge	668.5		Wilkins Peak Member		19																		125	105446	2213.54	9.51	4.93	585.87	42.82
1037		LG		lg	5		I	3	Wilkins Peak	mudstone	interior		overbank	mix	C	in		41.1959	-109.436	1 Currant Creek Ridge	668		Wilkins Peak Member		19																		125	105818	2236.48	0	12.49	910.24	46.05
1038		LG		lg	5		I	3	Wilkins Peak	mudstone	interior		overbank	mix	C	in		41.1959	-109.436	1 Currant Creek Ridge	667.5		Wilkins Peak Member		18																		125	88803.8	2066.12	0	9.18	556.93	48.22
1039		LG		lg	2.5	f	I	3	Wilkins Peak	sandstone	interior		overbank	mix	C	in		41.1959	-109.436	1 Currant Creek Ridge	667		Wilkins Peak Member		20																		125	58562.6	1460.82	0	9.06	916.88	38
1040		LG		lg	2.5	f	I	3	Wilkins Peak	sandstone	interior		overbank	mix	C	in		41.1959	-109.436	1 Currant Creek Ridge	666.5		Wilkins Peak Member		20																		125	45263.4	1353.04	0	14.75	705.48	53.98
1041		LG		lg	5		I	3	Wilkins Peak	mudstone	interior		overbank	mix	C	in		41.1959	-109.436	1 Currant Creek Ridge	666		Wilkins Peak Member		18																		124.08	92351.5	1974.97	0	7.98	590.31	42.84
1042		LG		lg	2.5	f	I	3	Wilkins Peak	sandstone	interior		littoral	mix	C	in		41.1959	-109.436	1 Currant Creek Ridge	665.5		Wilkins Peak Member		14																		125	65395.8	2185.86	10.03	5.82	588.05	45.77
1043		LG		lg	5		I	3	Wilkins Peak	mudstone	interior		overbank	mix	C	in		41.1959	-109.436	1 Currant Creek Ridge	665		Wilkins Peak Member		18																		125	88005.3	2006.48	14.88	6.27	546.54	43.25
1044		LG		lg	5		I	3	Wilkins Peak	mudstone	interior		overbank	mix	C	in		41.1959	-109.436	1 Currant Creek Ridge	664.5		Wilkins Peak Member		19																		125	127333	2561.7	95.6	8.53	494.15	40.67
1045		LG		lg	5		I	3	Wilkins Peak	mudstone	interior		overbank	mix	C	in		41.1959	-109.436	1 Currant Creek Ridge	664		Wilkins Peak Member		18																		125	82912.7	1819.51	9.86	6.42	633.33	44.19
1046		LG		lg	5		I	3	Wilkins Peak	mudstone	interior		overbank	mix	C	in		41.1959	-109.436	1 Currant Creek Ridge	663.5		Wilkins Peak Member		18																		125	128214	2630.09	11.57	6.61	910.93	43.58
1047		LG		lg	5		I	3	Wilkins Peak	mudstone	interior		overbank	mix	C	in		41.1959	-109.436	1 Currant Creek Ridge	663		Wilkins Peak Member		18																		125	88344.2	1978.79	19.4	7.11	585.9	44.01
1048		LG		lg	2.5	f	I	3	Wilkins Peak	sandstone	interior		fluvial	mix	C	in		41.1959	-109.436	1 Currant Creek Ridge	662.5		Wilkins Peak Member		14																		125	53478.4	1334.31	13.58	7.47	859.33	42.75
1049		LG		lg	3.5	vf	I	3	Wilkins Peak	sandstone	interior		fluvial	mix	C	in		41.1959	-109.436	1 Currant Creek Ridge	662		Wilkins Peak Member		14																		125	49346.1	1235.49	0	11.25	573.33	33.83
1050		LG		lg	3.5	vf	I	3	Wilkins Peak	sandstone	interior		fluvial	mix	C	in		41.1959	-109.436	1 Currant Creek Ridge	661.5		Wilkins Peak Member		14																		125	28384	976.87	0	10.72	486.29	44.43
1051		LG		lg	3.5	vf	I	3	Wilkins Peak	sandstone	interior		fluvial	mix	C	in		41.1959	-109.436	1 Currant Creek Ridge	661		Wilkins Peak Member		14																		125	88791.9	1907.04	0	9.32	615.79	37.16
1052		LG		lg	5		I	3	Wilkins Peak	mudstone	interior		overbank	mix	C	in		41.1959	-109.436	1 Currant Creek Ridge	660.5		Wilkins Peak Member		18																		125	121849	2448.73	84.16	8.71	584.22	39.85
1053		LG		lg	5		I	3	Wilkins Peak	mudstone	interior		overbank	mix	C	in		41.1959	-109.436	1 Currant Creek Ridge	660		Wilkins Peak Member		18																		125	105383	2278.54	0	9.02	850.83	42.91
1054		LG		lg	5		I	3	Wilkins Peak	mudstone	interior		overbank	mix	C	in		41.1959	-109.436	1 Currant Creek Ridge	659.5		Wilkins Peak Member		18																		125	96182.8	2063.76	0	11.06	619.25	43.39
1055		LG		lg	5		I	3	Wilkins Peak	mudstone	interior		overbank	mix	C	in		41.1959	-109.436	1 Currant Creek Ridge	659		Wilkins Peak Member		19																		125	119508	2238.19	9.63	5.71	486.47	36.88
1056		LG		lg	5		I	3	Wilkins Peak	mudstone	interior		overbank	mix	C	in		41.1959	-109.436	1 Currant Creek Ridge	658.5		Wilkins Peak Member		19																		125	84687.7	2005.22	10	5.89	863.24	42.33
1057		LG		lg	5		I	3	Wilkins Peak	mudstone	interior		overbank	mix	C	in		41.1959	-109.436	1 Currant Creek Ridge	658		Wilkins Peak Member		19																		125	72196.3	1821.24	0	10.16	648.83	52.46
1058		LG		lg	5		I	3	Wilkins Peak	mudstone	interior		overbank	mix	C	in		41.1959	-109.436	1 Currant Creek Ridge	657.5		Wilkins Peak Member		19																		125	102334	2117.14	12.63	5.75	569.2	41.47
1059		LG		lg	5		I	3	Wilkins Peak	mudstone	interior		overbank	mix	C	in		41.1959	-109.436	1 Currant Creek Ridge	657		Wilkins Peak Member		19																		125	111711	2437.66	73.43	7.78	674.17	41.94
1060		LG		lg	5		I	3	Wilkins Peak	mudstone	interior		overbank	mix	C	in		41.1959	-109.436	1 Currant Creek Ridge	656.5		Wilkins Peak Member		18																		125	78492	1787.1	23.27	6.55	646.88	45.59
1061		LG		lg	5		I	3	Wilkins Peak	mudstone	interior		overbank	mix	C	in		41.1959	-109.436	1 Currant Creek Ridge	656		Wilkins Peak Member		18																		125	128837	2599.31	0	10.82	610.38	38.97
1062		LG		lg	5		I	3	Wilkins Peak	mudstone	interior		overbank	mix	C	in		41.1959	-109.436	1 Currant Creek Ridge	655.5		Wilkins Peak Member		18																		125	113367	2238.25	0	13.78	751.5	40.71
1063		LG		lg	5		I	3	Wilkins Peak	mudstone	interior		overbank	mix	C	in		41.1959	-109.436	1 Currant Creek Ridge	655		Wilkins Peak Member		18																		125	118068	2383.17	0	12.09	620.84	40.96
1064		LG		lg	5		I	3	Wilkins Peak	mudstone	interior		overbank	mix	C	in		41.1959	-109.436	1 Currant Creek Ridge	654.5		Wilkins Peak Member		18																		125	91699.7	2019.29	0	13.71	621.28	43.63
1065		LG		lg	5		I	3	Wilkins Peak	mudstone	interior		overbank	mix	C	in		41.1959	-109.436	1 Currant Creek Ridge	654		Wilkins Peak Member		18																		125	97433.6	2095.45	0	11.45	568.25	43.63
1066		LG		lg	5		I	3	Wilkins Peak	mudstone	interior		overbank	mix	C	in		41.1959	-109.436	1 Currant Creek Ridge	653.5		Wilkins Peak Member		18																		125	102942	2184.83	12.84	6.51	592.7	43.88
1067		LG		lg	5		I	3	Wilkins Peak	mudstone	interior		overbank	mix	C	in		41.1959	-109.436	1 Currant Creek Ridge	653		Wilkins Peak Member		18																		125	70713.4	1717.58	13.22	7.83	493.09	47.73
1068		LG		lg	5		I	3	Wilkins Peak	mudstone	interior		overbank	mix	C	in		41.1959	-109.436	1 Currant Creek Ridge	652.5		Wilkins Peak Member		18																		124.37	120742	2344.5	8.6	5.27	567.8	41.54
1069		LG		lg	5		I	3	Wilkins Peak	mudstone	interior		overbank	mix	C	in		41.1959	-109.436	1 Currant Creek Ridge	652		Wilkins Peak Member		18																		123.52	89470.5	1962.54	0	7.85	621.28	43.92
1070		LG		lg	5		I	3	Wilkins Peak	mudstone	interior		overbank	mix	C	in		41.1959	-109.436	1 Currant Creek Ridge	651.5		Wilkins Peak Member		18																		125	94580.3	2001.11	0	10.69	584.31	40.99
1071		LG		lg	5		I	3	Wilkins Peak	mudstone	interior		overbank	mix	C	in		41.1959	-109.436	1 Currant Creek Ridge	651		Wilkins Peak Member		19																		125	105440	2171.81	0	7.07	656.06	42.86
1072		LG		lg	5		I	3	Wilkins Peak	mudstone	interior		overbank	mix	C	in		41.1959	-109.436	1 Currant Creek Ridge	650.5		Wilkins Peak Member		19																		125	83207.2	2384.3	0	9.02	623.34	43.92
1073		LG		lg	5		I	3	Wilkins Peak	mudstone	interior		overbank	mix	C	in		41.1959	-109.436	1 Currant Creek Ridge	650		Wilkins Peak Member		19																		125	91475.9	1965.02	0	7.01	550.99	43.17
1074		LG		lg	5		I	3	Wilkins Peak	mudstone	interior		overbank	mix	C	in		41.1959	-109.436	1 Currant Creek Ridge	649.5		Wilkins Peak Member		19																		125	91522.4	2075.18	0	8.8	532.06	43.07
1075		LG		lg	5		I	3	Wilkins Peak	mudstone	interior		overbank	mix	C	in		41.1959	-109.436	1 Currant Creek Ridge	649		Wilkins Peak Member		19																		125	75235.5	1878.73	0	7.24	594.32	46.75
1076		LG		lg	5		I	3	Wilkins Peak	mudstone	interior		overbank	mix	C	in		41.1959	-109.436	1 Currant Creek Ridge	648.5		Wilkins Peak Member		19																		125	96166.4	2515.32	0	8.27	709.5	44.93
1077		LG		lg	5		I	3	Wilkins Peak	mudstone	interior		overbank	mix	C	in		41.1959	-109.436	1 Currant Creek Ridge	648		Wilkins Peak Member		19																		125	81186.5	1907.48	8.64	4.97	550.77	43.9
1078		LG		lg	5		I	3	Wilkins Peak	mudstone	interior		overbank	mix	C	in		41.1959	-109.436	1 Currant Creek Ridge	647.5		Wilkins Peak Member		19																		125	51503.6	1502.18	0	11.13	818.06	57.81
1079		LG		lg	5		I	3	Wilkins Peak	mudstone	interior		overbank	mix	C	in		41.1959	-109.436	1 Currant Creek Ridge	647		Wilkins Peak Member		19																		125	81830.8	2680.78	21.56	12.63	657.4	45.07
1080		LG		lg	5		I	3	Wilkins Peak	mudstone	interior		overbank	mix	C	in		41.1959	-109.436	1 Currant Creek Ridge	646.5		Wilkins Peak Member		18																		125	87031.5	2437.58	0	11.69	692.6	44.34
1081		LG		lg	5		I	3	Wilkins Peak	mudstone	interior		overbank	mix	C	in		41.1959	-109.436	1 Currant Creek Ridge	646		Wilkins Peak Member		18																		125	107686	2439.8	0	6.89	591.66	43.67
1082		LG		lg	5		I	3	Wilkins Peak	mudstone	interior		overbank	mix	C	in		41.1959	-109.436	1 Currant Creek Ridge	645.5		Wilkins Peak Member		18																		125	88843.8	2319.45	0	10.25	614.34	48.13
1083		LG		lg	5		I	3	Wilkins Peak	mudstone	interior		overbank	mix	C	in		41.1959	-109.436	1 Currant Creek Ridge	645		Wilkins Peak Member		19																		123.64	107165	2271.16	10.27	5.71	768.04	43.06
1084		LG		lg	5		I	3	Wilkins Peak	mudstone	interior		overbank	mix	C	in		41.1959	-109.436	1 Currant Creek Ridge	644.5		Wilkins Peak Member		19																		125	112206	2331.96	0	9.33	747.87	47.42
1085		LG		lg	5		I	3	Wilkins Peak	mudstone	interior		overbank	mix	C	in		41.1959	-109.436	1 Currant Creek Ridge	644		Wilkins Peak Member		19																		125	120324	2414.12	8.44	4.84	573.82	39.92
1086		LG		lg	5		I	3	Wilkins Peak	mudstone	interior		overbank	mix	C	in		41.1959	-109.436	1 Currant Creek Ridge	643.5		Wilkins Peak Member		19																		125	84264.4	1928.76	0	9.92	474.43	44.72
1087		LG		lg	5		I	3	Wilkins Peak	mudstone	interior		overbank	mix	C	in		41.1959	-109.436	1 Currant Creek Ridge	643		Wilkins Peak Member		19																		125	56663.4	1657.75	0	11.3	816.54	58.55
1088		LG		lg	5		I	3	Wilkins Peak	mudstone	interior		overbank	mix	C	in		41.1959	-109.436	1 Currant Creek Ridge	642.5		Wilkins Peak Member		19																		125	64193.9	1693.58	0	10.11	517.8	52.55
1089		LG		lg	5		I	3	Wilkins Peak	mudstone	interior		overbank	mix	C	in		41.1959	-109.436	1 Currant Creek Ridge	642		Wilkins Peak Member		19																		125	130875	2557.63	0	13.26	659.48	40.79
1090		LG		lg	5		I	3	Wilkins Peak	mudstone	interior		overbank	mix	C	in		41.1959	-109.436	1 Currant Creek Ridge	641.5		Wilkins Peak Member		21																		122.63	106987	2179.6	0	9.57	540.17	43.01
1091		LG		lg	5		I	3	Wilkins Peak	mudstone	interior		overbank	mix	C	in		41.1959	-109.436	1 Currant Creek Ridge	641		Wilkins Peak Member		19																		125	134799	2574.5	0	8.02	571.77	40.33
1092		LG		lg	5		I	3	Wilkins Peak	mudstone	interior		overbank	mix	C	in		41.1959	-109.436	1 Currant Creek Ridge	640.5		Wilkins Peak Member		18																		125	105307	2162.37	0	8.56	561.57	43.35
1093		LG		lg	5		I	3	Wilkins Peak	mudstone	interior		overbank	mix	C	in		41.1959	-109.436	1 Currant Creek Ridge	640		Wilkins Peak Member		18																		125	128331	2491.14	0	8.19	777.74	43.58
1094		LG		lg	5		I	3	Wilkins Peak	mudstone	interior		overbank	mix	C	in		41.1959	-109.436	1 Currant Creek Ridge	639.5		Wilkins Peak Member		18																		125	127483	2547.89	0	9.21	657.2	40.79
1095		LG		lg	5		I	3	Wilkins Peak	mudstone	interior		overbank	mix	C	in		41.1959	-109.436	1 Currant Creek Ridge	639		Wilkins Peak Member		18																		123.52	112245	2364.18	10.93	6.28	779.55	44.36
1096		LG		lg	5		I	3	Wilkins Peak	mudstone	interior		overbank	mix	C	in		41.1959	-109.436	1 Currant Creek Ridge	638.5		Wilkins Peak Member		19																		125	91179.6	2054.33	0	11.45	655.81	48.22
1097		LG		lg	5		I	3	Wilkins Peak	mudstone	interior		overbank	mix	C	in		41.1959	-109.436	1 Currant Creek Ridge	638		Wilkins Peak Member		19																		125	122051	2459.79	10.28	6.18	666.78	42.37
1098		LG		lg	5		I	3	Wilkins Peak	mudstone	interior		overbank	mix	C	in		41.1959	-109.436	1 Currant Creek Ridge	637.5		Wilkins Peak Member		19																		125	114115	2307.53	25.24	6.45	633.69	42.36
1099		LG		lg	5		I	3	Wilkins Peak	mudstone	interior		overbank	mix	C	in		41.1959	-109.436	1 Currant Creek Ridge	637		Wilkins Peak Member		19																		125	108778	2324.1	14.23	5.78	651.08	44.73
1100		LG		lg	5		I	3	Wilkins Peak	mudstone	interior		overbank	mix	C	in		41.1959	-109.436	1 Currant Creek Ridge	636.5		Wilkins Peak Member		19																		125	114404	2468.12	9.08	5.96	681.93	46.17
1101		LG		lg	5		I	3	Wilkins Peak	mudstone	interior		overbank	mix	C	in		41.1959	-109.436	1 Currant Creek Ridge	636		Wilkins Peak Member		18																		125	87006.8	2000.26	9.24	6.08	509.07	48.52
1102		LG		lg	5		I	3	Wilkins Peak	mudstone	interior		overbank	mix	C	in		41.1959	-109.436	1 Currant Creek Ridge	635.5		Wilkins Peak Member		18																		125	112168	2296.79	10.99	6.26	569.64	44.52
1103		LG		lg	5		I	3	Wilkins Peak	mudstone	interior		overbank	mix	C	in		41.1959	-109.436	1 Currant Creek Ridge	635		Wilkins Peak Member		18																		125	122869	2644.28	9.46	6.26	735.44	46.86
1104		LG		lg	5		I	3	Wilkins Peak	mudstone	interior		overbank	mix	C	in		41.1959	-109.436	1 Currant Creek Ridge	634.5		Wilkins Peak Member		18																		125	52806	1743.72	0	10.25	2042.53	78.65
1105		LG		lg	5		I	3	Wilkins Peak	mudstone	interior		overbank	mix	C	in		41.1959	-109.436	1 Currant Creek Ridge	634		Wilkins Peak Member		18																		125	37727.5	1400.36	15.68	7.42	559.37	65.56
1106		LG		lg	5			3	Wilkins Peak	carbonate	interior		profundal	mix	C	in		41.1959	-109.436	1 Currant Creek Ridge	633.5		Wilkins Peak Member		12																		125	86870.8	1972.04	14.04	6.31	723.65	45.5
1107		LG		lg	5			3	Wilkins Peak	carbonate	interior		profundal	mix	C	in		41.1959	-109.436	1 Currant Creek Ridge	633		Wilkins Peak Member		12																		125	109153	2118.8	13.17	6.97	570.11	39.21
1108		LG		lg	5			3	Wilkins Peak	carbonate	interior		profundal	mix	C	in		41.1959	-109.436	1 Currant Creek Ridge	632.5		Wilkins Peak Member		12																		125	63147	1679.89	0	13.11	726.56	53.78
1109		LG		lg	5			3	Wilkins Peak	carbonate	interior		profundal	mix	C	in		41.1959	-109.436	1 Currant Creek Ridge	632		Wilkins Peak Member		12																		125	73571.1	1725.74	0	9.15	604.04	46.95
1110		LG		lg	5			3	Wilkins Peak	carbonate	interior		profundal	mix	C	in		41.1959	-109.436	1 Currant Creek Ridge	631.5		Wilkins Peak Member		12																		125	96191.8	1953.92	17.83	8.47	916.9	42.39
1111		LG		lg	5			3	Wilkins Peak	carbonate	interior		profundal	mix	C	in		41.1959	-109.436	1 Currant Creek Ridge	631		Wilkins Peak Member		12																		125	108234	2244.04	27.71	7	662.52	43.86
1112		LG		lg	5			3	Wilkins Peak	carbonate	interior		profundal	mix	C	in		41.1959	-109.436	1 Currant Creek Ridge	630.5		Wilkins Peak Member		12																		125	101850	2119.56	27.17	6.68	685.55	42.79
1113		LG		lg	3			3	Wilkins Peak	carbonate	interior		littoral	mix	C	in		41.1959	-109.436	1 Currant Creek Ridge	629.5		Wilkins Peak Member		8																		125	60342.2	1514.42	31.56	7.04	723.77	43.42
1114		LG		lg	3			3	Wilkins Peak	carbonate	interior		littoral	mix	C	in		41.1959	-109.436	1 Currant Creek Ridge	629		Wilkins Peak Member		8																		125	60174.6	1565.41	36.57	6.9	641.76	46.79
1115		LG		lg	3			3	Wilkins Peak	carbonate	interior		littoral	mix	C	in		41.1959	-109.436	1 Currant Creek Ridge	628.5		Wilkins Peak Member		8																		125	105508	2236.54	23.87	6.4	655.51	40.47
1116		LG		lg	3		I	3	Wilkins Peak	sandstone	interior		littoral	mix	C	in		41.1959	-109.436	1 Currant Creek Ridge	628		Wilkins Peak Member		8																		125	127674	2614.31	42.34	7.26	501.87	41.5
1117		LG		lg	5			3	Wilkins Peak	carbonate	interior		profundal	mix	C	in		41.1959	-109.436	1 Currant Creek Ridge	627.5		Wilkins Peak Member		13																		125	115444	2722.86	73.39	7.28	429.07	38.85
1118		LG		lg	4			3	Wilkins Peak	carbonate	interior		palustrine	mix	C	in		41.1959	-109.436	1 Currant Creek Ridge	627		Wilkins Peak Member		1																		125	38300.6	1699.08	14.1	5.64	531.5	42.17
1119		LG		lg	4			3	Wilkins Peak	carbonate	interior		palustrine	mix	C	in		41.1959	-109.436	1 Currant Creek Ridge	626.5		Wilkins Peak Member		1																		125	10771.9	1313.78	0	10.14	479.1	48.44
1120		LG		lg	4			3	Wilkins Peak	carbonate	interior		palustrine	mix	C	in		41.1959	-109.436	1 Currant Creek Ridge	626		Wilkins Peak Member		1																		125	32183.7	1672.98	15.26	5.64	602.91	41.05
1121		LG		lg	4			3	Wilkins Peak	carbonate	interior		palustrine	mix	C	in		41.1959	-109.436	1 Currant Creek Ridge	625.5		Wilkins Peak Member		1																		125	51580.9	2025.09	16.61	5.85	646	40.23
1122		LG		lg	4			3	Wilkins Peak	carbonate	interior		palustrine	mix	C	in		41.1959	-109.436	1 Currant Creek Ridge	625		Wilkins Peak Member		1																		125	39997	1845.51	0	6.77	659.03	41.35
1123		LG		lg	4			3	Wilkins Peak	carbonate	interior		palustrine	mix	C	in		41.1959	-109.436	1 Currant Creek Ridge	624.5		Wilkins Peak Member		1																		125	37336.7	1760.88	0	7.3	627.95	40.59
1124		LG		lg	4			3	Wilkins Peak	carbonate	interior		palustrine	mix	C	in		41.1959	-109.436	1 Currant Creek Ridge	624		Wilkins Peak Member		1																		125	52013.3	1467.26	0	7.29	538.69	40.09
1125		LG		lg	4			3	Wilkins Peak	carbonate	interior		palustrine	mix	C	in		41.1959	-109.436	1 Currant Creek Ridge	623.5		Wilkins Peak Member		1																		125	62213.1	2150.27	0	7.94	675.63	42.13
1126		LG		lg	4			3	Wilkins Peak	carbonate	interior		palustrine	mix	C	in		41.1959	-109.436	1 Currant Creek Ridge	623		Wilkins Peak Member		1																		125	39627.2	1796.4	0	7.29	677.69	45.52
1127		LG		lg	4			3	Wilkins Peak	carbonate	interior		palustrine	mix	C	in		41.1959	-109.436	1 Currant Creek Ridge	622.5		Wilkins Peak Member		1																		125	47536.6	1798.37	0	12.19	802.69	44.8
1128		LG		lg	4			3	Wilkins Peak	carbonate	interior		palustrine	mix	C	in		41.1959	-109.436	1 Currant Creek Ridge	622		Wilkins Peak Member		1																		125	24916.4	1365.06	0	8.11	632.05	48.28
1129		LG		lg	4			3	Wilkins Peak	carbonate	interior		palustrine	mix	C	in		41.1959	-109.436	1 Currant Creek Ridge	621.5		Wilkins Peak Member		3																		125	23259.8	1126.78	0	7.86	564.21	47.78
1130		LG		lg	5			3	Wilkins Peak	carbonate	interior		profundal	mix	C	in		41.1959	-109.436	1 Currant Creek Ridge	621		Wilkins Peak Member		13																		125	51933.1	1821.93	13.05	5.33	446.11	36.73
1131		LG		lg	5			3	Wilkins Peak	carbonate	interior		profundal	mix	C	in		41.1959	-109.436	1 Currant Creek Ridge	620.5		Wilkins Peak Member		13																		125	37761.8	1997.38	0	9.09	756.6	46.45
1132		LG		lg	5			3	Wilkins Peak	carbonate	interior		profundal	mix	C	in		41.1959	-109.436	1 Currant Creek Ridge	620		Wilkins Peak Member		13																		125	83746.9	2380.14	17.11	5.66	601.95	40.77
1133		LG		lg	5			3	Wilkins Peak	carbonate	interior		profundal	mix	C	in		41.1959	-109.436	1 Currant Creek Ridge	619.5		Wilkins Peak Member		13																		125	10852.2	1166.76	0	8.17	413.05	37.77
1134		LG		lg	4			3	Wilkins Peak	carbonate	interior		palustrine	mix	C	in		41.1959	-109.436	1 Currant Creek Ridge	619		Wilkins Peak Member		1																		125	96147.3	2844.75	10.91	5.22	437.44	38.79
1135		LG		lg	4			3	Wilkins Peak	carbonate	interior		palustrine	mix	C	in		41.1959	-109.436	1 Currant Creek Ridge	618.5		Wilkins Peak Member		1																		125	21397.2	1227.98	8.25	5.36	465.58	45.12
1136		LG		lg	4			3	Wilkins Peak	carbonate	interior		palustrine	mix	C	in		41.1959	-109.436	1 Currant Creek Ridge	618		Wilkins Peak Member		1																		125	55300.7	1912.49	9.38	4.97	480.18	38.19
1137		LG		lg	4			3	Wilkins Peak	carbonate	interior		palustrine	mix	C	in		41.1959	-109.436	1 Currant Creek Ridge	617.5		Wilkins Peak Member		1																		125	23465.9	1696.4	0	10.8	700.99	44.37
1138		LG		lg	4			3	Wilkins Peak	carbonate	interior		palustrine	mix	C	in		41.1959	-109.436	1 Currant Creek Ridge	617		Wilkins Peak Member		2																		125	65099.2	2157.9	18.64	6.29	640.29	42.44
1139		LG		lg	4			3	Wilkins Peak	carbonate	interior		palustrine	mix	C	in		41.1959	-109.436	1 Currant Creek Ridge	616.5		Wilkins Peak Member		2																		125	33373.8	1805.04	13.94	5.43	665.3	44.02
1140		LG		lg	5			3	Wilkins Peak	carbonate	interior		profundal	mix	C	in		41.1959	-109.436	1 Currant Creek Ridge	616		Wilkins Peak Member		12																		125	21317.1	1410.14	0	8.29	548.78	46.41
1141		LG		lg	5			3	Wilkins Peak	carbonate	interior		profundal	mix	C	in		41.1959	-109.436	1 Currant Creek Ridge	615.5		Wilkins Peak Member		12																		125	36245	1758.39	7.74	5.14	601.61	41.57
1142		LG		lg	5			3	Wilkins Peak	carbonate	interior		profundal	mix	C	in		41.1959	-109.436	1 Currant Creek Ridge	615		Wilkins Peak Member		12																		125	34176.9	1845.95	13.15	6.19	622.64	40.11
1143		LG		lg	3			3	Wilkins Peak	tuff	interior		tuff	mix	C	in		41.1959	-109.436	1 Currant Creek Ridge	614.5		Wilkins Peak Member																				125	55029.9	1895.97	44.36	6.95	618.1	40.69
1144		LG		lg	5			3	Wilkins Peak	carbonate	interior		profundal	mix	C	in		41.1959	-109.436	1 Currant Creek Ridge	614		Wilkins Peak Member		12																		125	14017.4	1075.44	0	8.89	562.26	52.76
1145		LG		lg	5			3	Wilkins Peak	carbonate	interior		profundal	mix	C	in		41.1959	-109.436	1 Currant Creek Ridge	613.5		Wilkins Peak Member		12																		125	31561.8	1523.47	8.08	5.36	511.32	39.94
1146		LG		lg	5			3	Wilkins Peak	carbonate	interior		profundal	mix	C	in		41.1959	-109.436	1 Currant Creek Ridge	613		Wilkins Peak Member		13																		125	23520	1395.58	0	7.79	496.37	42.59
1147		LG		lg	5			3	Wilkins Peak	carbonate	interior		profundal	mix	C	in		41.1959	-109.436	1 Currant Creek Ridge	612.5		Wilkins Peak Member		13																		125	26237.4	1652.15	0	9.72	549.01	40.75
1148		LG		lg	5			3	Wilkins Peak	carbonate	interior		profundal	mix	C	in		41.1959	-109.436	1 Currant Creek Ridge	612		Wilkins Peak Member		13																		125	31400.5	1550.27	26.11	5.52	546.55	35.9
1149		LG		lg	5			3	Wilkins Peak	carbonate	interior		profundal	mix	C	in		41.1959	-109.436	1 Currant Creek Ridge	611.5		Wilkins Peak Member		13																		125	29031.8	1661.67	8.94	4.97	566.06	41.13
1150		LG		lg	5			3	Wilkins Peak	carbonate	interior		profundal	mix	C	in		41.1959	-109.436	1 Currant Creek Ridge	611		Wilkins Peak Member		13																		125	29709	1696.23	0	7.66	543.22	41.14
1151		LG		lg	5			3	Wilkins Peak	carbonate	interior		profundal	mix	C	in		41.1959	-109.436	1 Currant Creek Ridge	610.5		Wilkins Peak Member		12																		125	28514.4	1645.15	0	8.02	634.1	46.69
1152		LG		lg	5			3	Wilkins Peak	carbonate	interior		profundal	mix	C	in		41.1959	-109.436	1 Currant Creek Ridge	610		Wilkins Peak Member		13																		125	24021.6	1582.22	0	7.57	493.04	40.58
1153		LG		lg	5			3	Wilkins Peak	carbonate	interior		profundal	mix	C	in		41.1959	-109.436	1 Currant Creek Ridge	609.5		Wilkins Peak Member		12																		125	13305.1	1160.56	9.75	6.07	498.2	56.75
1154		LG		lg	5			3	Wilkins Peak	carbonate	interior		profundal	mix	C	in		41.1959	-109.436	1 Currant Creek Ridge	609		Wilkins Peak Member		12																		125	18460.1	1288.95	0	10.28	668.18	45.44
1155		LG		lg	5			3	Wilkins Peak	carbonate	interior		profundal	mix	C	in		41.1959	-109.436	1 Currant Creek Ridge	608.5		Wilkins Peak Member		13																		125	50730.1	1685.2	19.38	5.98	429.27	35.96
1156		LG		lg	5			3	Wilkins Peak	carbonate	interior		profundal	mix	C	in		41.1959	-109.436	1 Currant Creek Ridge	608		Wilkins Peak Member		13																		125	32370.7	1503.84	0	7.74	389.94	35.27
1157		LG		lg	5			3	Wilkins Peak	carbonate	interior		profundal	mix	C	in		41.1959	-109.436	1 Currant Creek Ridge	607.5		Wilkins Peak Member		13																		125	22515.8	1451.91	0	6.59	470.35	40.68
1158		LG		lg	5			3	Wilkins Peak	carbonate	interior		profundal	mix	C	in		41.1959	-109.436	1 Currant Creek Ridge	607		Wilkins Peak Member		13																		125	13672.2	1386.4	0	8.43	537.11	41.23
1159		LG		lg	4			3	Wilkins Peak	carbonate	interior		palustrine	mix	C	in		41.1959	-109.436	1 Currant Creek Ridge	606.5		Wilkins Peak Member		1																		125	31528.2	2005.17	0	10.51	698.93	45.6
1160		LG		lg	4			3	Wilkins Peak	carbonate	interior		palustrine	mix	C	in		41.1959	-109.436	1 Currant Creek Ridge	606		Wilkins Peak Member		1																		125	63207.2	2393.43	0	11.65	613.77	41.79
1161		LG		lg	4			3	Wilkins Peak	carbonate	interior		palustrine	mix	C	in		41.1959	-109.436	1 Currant Creek Ridge	605.5		Wilkins Peak Member		2																		125	29913.2	1560.9	14.8	5.27	578.79	42.5
1162		LG		lg	4			3	Wilkins Peak	carbonate	interior		palustrine	mix	C	in		41.1959	-109.436	1 Currant Creek Ridge	605		Wilkins Peak Member		1																		125	53580.6	2067.97	141.79	8.69	541.81	39.34
1163		LG		lg	4			4	Wilkins Peak	carbonate	interior		palustrine	mix	C	in		41.5509	-109.418	1 White Mountain	498		Wilkins Peak Member		1																		125	15015.8	1535.39	0	11.79	1644.86	56.58
1164		LG		lg	4			4	Wilkins Peak	carbonate	interior		palustrine	mix	C	in		41.5509	-109.418	1 White Mountain	497.5		Wilkins Peak Member		1																		125	20707.4	1534.99	0	11.96	588.78	44.54
1165		LG		lg	4			4	Wilkins Peak	carbonate	interior		palustrine	mix	C	in		41.5509	-109.418	1 White Mountain	497		Wilkins Peak Member		1																		125	23622.9	1277.39	0	8.6	341.7	37.2
1166		LG		lg	4			4	Wilkins Peak	carbonate	interior		palustrine	mix	C	in		41.5509	-109.418	1 White Mountain	496.5		Wilkins Peak Member		1																		125	42478.2	2257.01	15.19	6.09	518.05	47.08
1167		LG		lg	4			4	Wilkins Peak	carbonate	interior		palustrine	mix	C	in		41.5509	-109.418	1 White Mountain	496		Wilkins Peak Member		1																		125	40175.4	1545.64	0	6.49	325.67	33.62
1168		LG		lg	4			4	Wilkins Peak	carbonate	interior		palustrine	mix	C	in		41.5509	-109.418	1 White Mountain	495.5		Wilkins Peak Member		1																		125	32382.2	1986.38	0	6.89	374.64	47.08
1169		LG		lg	4			4	Wilkins Peak	carbonate	interior		palustrine	mix	C	in		41.5509	-109.418	1 White Mountain	495		Wilkins Peak Member		1																		125	39763.3	1956.18	0	8.31	10160.5	142.23
1170		LG		lg	4			4	Wilkins Peak	carbonate	interior		palustrine	mix	C	in		41.5509	-109.418	1 White Mountain	494.5		Wilkins Peak Member		1																		125	10761	692.04	0	6.9	71.76	29.67
1171		LG		lg	4			4	Wilkins Peak	carbonate	interior		palustrine	mix	C	in		41.5509	-109.418	1 White Mountain	494		Wilkins Peak Member		1																		125	17133.4	865.38	0	5.96	168.92	28.79
1172		LG		lg	4			4	Wilkins Peak	carbonate	interior		palustrine	mix	C	in		41.5509	-109.418	1 White Mountain	493.5		Wilkins Peak Member		3																		125	44669.8	1501.68	269.64	12.67	393.69	37.77
1173		LG		lg	5			4	Wilkins Peak	carbonate	interior		profundal	mix	C	in		41.5509	-109.418	1 White Mountain	493		Wilkins Peak Member		12																		125	39719.1	1869.09	0	7.99	429.68	38.43
1174		LG		lg	5			4	Wilkins Peak	carbonate	interior		profundal	mix	C	in		41.5509	-109.418	1 White Mountain	492.5		Wilkins Peak Member		13																		125	48174.2	1884.06	0	11.7	439.49	42.64
1175		LG		lg	5			4	Wilkins Peak	carbonate	interior		profundal	mix	C	in		41.5509	-109.418	1 White Mountain	492		Wilkins Peak Member		13																		125	55920.7	1900.23	0	13.28	433.5	45.21
1176		LG		lg	5			4	Wilkins Peak	carbonate	interior		profundal	mix	C	in		41.5509	-109.418	1 White Mountain	491.5		Wilkins Peak Member		12																		125	85550.8	2423.71	8.33	5.29	463.2	41.2
1177		LG		lg	3			4	Wilkins Peak	carbonate	interior		littoral	mix	C	in		41.5509	-109.418	1 White Mountain	491		Wilkins Peak Member		10																		125	38966.2	1764.31	0	11.36	489.98	44.97
1178		LG		lg	5			4	Wilkins Peak	carbonate	interior		profundal	mix	C	in		41.5509	-109.418	1 White Mountain	490.5		Wilkins Peak Member		12																		125	61804.7	2114.22	0	7.67	459.69	37.41
1179		LG		lg	5			4	Wilkins Peak	carbonate	interior		profundal	mix	C	in		41.5509	-109.418	1 White Mountain	490		Wilkins Peak Member		12																		125	53932.2	2049.38	0	8.83	344.82	45.39
1180		LG		lg	5			4	Wilkins Peak	carbonate	interior		profundal	mix	C	in		41.5509	-109.418	1 White Mountain	489.5		Wilkins Peak Member		12																		125	18815.6	1135.26	0	8.52	469.71	52.25
1181		LG		lg	5			4	Wilkins Peak	carbonate	interior		profundal	mix	C	in		41.5509	-109.418	1 White Mountain	489		Wilkins Peak Member		12																		125	53093	1642.88	0	7.83	304.38	34.21
1182		LG		lg	5			4	Wilkins Peak	carbonate	interior		profundal	mix	C	in		41.5509	-109.418	1 White Mountain	488.5		Wilkins Peak Member		12																		125	23872.5	1265.57	0	9.17	824.79	43.32
1183		LG		lg	5			4	Wilkins Peak	carbonate	interior		profundal	mix	C	in		41.5509	-109.418	1 White Mountain	488		Wilkins Peak Member		12																		125	52571.8	1582.51	0	11.11	358.61	34.76
1184		LG		lg	3			4	Wilkins Peak	tuff	interior		tuff	mix	C	in		41.5509	-109.418	1 White Mountain	487.5		Wilkins Peak Member																				125	79287.5	2107.23	0	7.58	659.13	38.59
1185		LG		lg	5			4	Wilkins Peak	carbonate	interior		profundal	mix	C	in		41.5509	-109.418	1 White Mountain	487		Wilkins Peak Member		12																		125	27774.2	1442.54	0	8.2	467	44.19
1186		LG		lg	5			4	Wilkins Peak	carbonate	interior		profundal	mix	C	in		41.5509	-109.418	1 White Mountain	486.5		Wilkins Peak Member		12																		125	34743.1	1404.76	0	6.91	492.09	34.28
1187		LG		lg	5			4	Wilkins Peak	carbonate	interior		profundal	mix	C	in		41.5509	-109.418	1 White Mountain	486		Wilkins Peak Member		12																		125	22424.8	1525.15	0	9.9	584.48	47.69
1188		LG		lg	5			4	Wilkins Peak	carbonate	interior		profundal	mix	C	in		41.5509	-109.418	1 White Mountain	485.5		Wilkins Peak Member		12																		125	51490.9	2342.49	0	13.65	1461.21	54.78
1189		LG		lg	5			4	Wilkins Peak	carbonate	interior		profundal	mix	C	in		41.5509	-109.418	1 White Mountain	485		Wilkins Peak Member		12																		125	31564.4	1540.91	0	6.23	626.77	40.29
1190		LG		lg	5			4	Wilkins Peak	carbonate	interior		profundal	mix	C	in		41.5509	-109.418	1 White Mountain	484.5		Wilkins Peak Member		12																		125	32981.5	1934.5	0	7.91	367.54	42.19
1191		LG		lg	5			4	Wilkins Peak	carbonate	interior		profundal	mix	C	in		41.5509	-109.418	1 White Mountain	484		Wilkins Peak Member		13																		125	31573.8	1758.96	8.13	5	407.34	40.14
1192		LG		lg	5			4	Wilkins Peak	carbonate	interior		profundal	mix	C	in		41.5509	-109.418	1 White Mountain	483.5		Wilkins Peak Member		13																		125	35621.4	1678.57	0	7.06	460.75	39.32
1193		LG		lg	5			4	Wilkins Peak	carbonate	interior		profundal	mix	C	in		41.5509	-109.418	1 White Mountain	483		Wilkins Peak Member		13																		125	32774.9	1326	0	7.66	372.13	32.42
1194		LG		lg	5			4	Wilkins Peak	carbonate	interior		profundal	mix	C	in		41.5509	-109.418	1 White Mountain	482.5		Wilkins Peak Member		13																		125	33287	1340.42	0	11.1	373.24	32.64
1195		LG		lg	5			4	Wilkins Peak	carbonate	interior		profundal	mix	C	in		41.5509	-109.418	1 White Mountain	482		Wilkins Peak Member		13																		125	9490.15	1126.07	0	7.82	500.88	42.26
1196		LG		lg	4			4	Wilkins Peak	carbonate	interior		palustrine	mix	C	in		41.5509	-109.418	1 White Mountain	481.5		Wilkins Peak Member		1																		125	22579.1	1415.08	17.77	5.25	543.43	38.47
1197		LG		lg	4			4	Wilkins Peak	carbonate	interior		palustrine	mix	C	in		41.5509	-109.418	1 White Mountain	481		Wilkins Peak Member		1																		125	10821.8	1215.24	0	7	783.23	42.9
1198		LG		lg	4			4	Wilkins Peak	carbonate	interior		palustrine	mix	C	in		41.5509	-109.418	1 White Mountain	480.5		Wilkins Peak Member		1																		125	9972.65	933.85	43.94	6.68	620.75	43.37
1199		LG		lg	4			4	Wilkins Peak	carbonate	interior		palustrine	mix	C	in		41.5509	-109.418	1 White Mountain	480		Wilkins Peak Member		1																		125	46223.3	1725.22	128.49	8.83	518.9	41.9
1200		LG		lg	4			4	Wilkins Peak	carbonate	interior		palustrine	mix	C	in		41.5509	-109.418	1 White Mountain	479.5		Wilkins Peak Member		1																		125	36934.8	1290.99	34.46	6.72	589.27	45.16
1201		LG		lg	4			4	Wilkins Peak	carbonate	interior		palustrine	mix	C	in		41.5509	-109.418	1 White Mountain	479		Wilkins Peak Member		1																		125	44071.5	1441.1	9.25	4.82	358.01	33.54
1202		LG		lg	4			4	Wilkins Peak	carbonate	interior		palustrine	mix	C	in		41.5509	-109.418	1 White Mountain	478.5		Wilkins Peak Member		1																		125	55316.6	1838.01	92.37	7.85	568.9	40.12
1203		LG		lg	5		I	4	Wilkins Peak	mudstone	interior		overbank	mix	C	in		41.5509	-109.418	1 White Mountain	478		Wilkins Peak Member		18																		125	49019.8	2059.9	8.48	5.28	528.89	39.81
1204		LG		lg	5		I	4	Wilkins Peak	mudstone	interior		overbank	mix	C	in		41.5509	-109.418	1 White Mountain	477.5		Wilkins Peak Member		18																		125	58938.8	1985.77	11.74	5.21	483.02	36.41
1205		LG		lg	5		I	4	Wilkins Peak	mudstone	interior		overbank	mix	C	in		41.5509	-109.418	1 White Mountain	477		Wilkins Peak Member		18																		125	49267.7	2034.67	10.17	4.96	494.56	39.45
1206		LG		lg	5		I	4	Wilkins Peak	mudstone	interior		overbank	mix	C	in		41.5509	-109.418	1 White Mountain	476.5		Wilkins Peak Member		18																		125	56579.5	2041.7	0	11.54	3541.11	64.96
1207		LG		lg	5		I	4	Wilkins Peak	mudstone	interior		overbank	mix	C	in		41.5509	-109.418	1 White Mountain	476		Wilkins Peak Member		18																		125	46785.8	1805.69	67.05	7.26	463.53	38.25
1208		LG		lg	5		I	4	Wilkins Peak	mudstone	interior		overbank	mix	C	in		41.5509	-109.418	1 White Mountain	475.5		Wilkins Peak Member		18																		125	59222.6	2082.39	0	6.92	543	38.47
1209		LG		lg	5		I	4	Wilkins Peak	mudstone	interior		overbank	mix	C	in		41.5509	-109.418	1 White Mountain	475		Wilkins Peak Member		18																		125	45005.1	1721.92	0	9.9	501.83	47.33
1210		LG		lg	5		I	4	Wilkins Peak	mudstone	interior		overbank	mix	C	in		41.5509	-109.418	1 White Mountain	474.5		Wilkins Peak Member		21																		125	62642.2	2252.98	0	7.79	533.87	39.42
1211		LG		lg	5		I	4	Wilkins Peak	mudstone	interior		overbank	mix	C	in		41.5509	-109.418	1 White Mountain	474		Wilkins Peak Member		21																		125	67826.6	2274.13	7.98	5.21	511.42	39.97
1212		LG		lg	5		I	4	Wilkins Peak	mudstone	interior		overbank	mix	C	in		41.5509	-109.418	1 White Mountain	473.5		Wilkins Peak Member		18																		125	80790.8	2327	8.05	5.34	467.48	39.08
1213		LG		lg	5		I	4	Wilkins Peak	mudstone	interior		overbank	mix	C	in		41.5509	-109.418	1 White Mountain	473		Wilkins Peak Member		18																		125	40597.7	1702.49	25.03	5.76	486.86	44.45
1214		LG		lg	5		I	4	Wilkins Peak	mudstone	interior		overbank	mix	C	in		41.5509	-109.418	1 White Mountain	472.5		Wilkins Peak Member		18																		125	102018	2528.46	18.86	6.18	676.14	41.65
1215		LG		lg	5		I	4	Wilkins Peak	mudstone	interior		overbank	mix	C	in		41.5509	-109.418	1 White Mountain	472		Wilkins Peak Member		18																		125	99214.8	2434.06	71.75	7.35	539.61	39.56
1216		LG		lg	5		I	4	Wilkins Peak	mudstone	interior		overbank	mix	C	in		41.5509	-109.418	1 White Mountain	471.5		Wilkins Peak Member		21																		125	32581.6	1364.62	0	14.02	716.21	60.06
1217		LG		lg	3.5	vf	I	4	Wilkins Peak	sandstone	interior		overbank	mix	C	in		41.5509	-109.418	1 White Mountain	471		Wilkins Peak Member		17																		125	36614.3	1358.5	11.01	6.56	455.58	52.17
1218		LG		lg	5		I	4	Wilkins Peak	mudstone	interior		overbank	mix	C	in		41.5509	-109.418	1 White Mountain	470.5		Wilkins Peak Member		18																		125	79725.4	2185.9	0	8.38	605.8	44.79
1219		LG		lg	5		I	4	Wilkins Peak	mudstone	interior		overbank	mix	C	in		41.5509	-109.418	1 White Mountain	470		Wilkins Peak Member		21																		125	24349.8	1619.77	0	7.67	458.95	42.42
1220		LG		lg	5		I	4	Wilkins Peak	mudstone	interior		overbank	mix	C	in		41.5509	-109.418	1 White Mountain	469.5		Wilkins Peak Member		18																		125	66361.6	1770.14	8.67	5.3	1333.16	45.87
1221		LG		lg	5		I	4	Wilkins Peak	mudstone	interior		overbank	mix	C	in		41.5509	-109.418	1 White Mountain	469		Wilkins Peak Member		21																		125	97789.4	2149.95	9.09	5.41	586.17	40.31
1222		LG		lg	5		I	4	Wilkins Peak	mudstone	interior		overbank	mix	C	in		41.5509	-109.418	1 White Mountain	468.5		Wilkins Peak Member		18																		125	88430.6	2640	13.92	5.69	567.97	42.38
1223		LG		lg	5		I	4	Wilkins Peak	mudstone	interior		overbank	mix	C	in		41.5509	-109.418	1 White Mountain	468		Wilkins Peak Member		18																		125	82862.3	2446.91	0	9.93	582.69	41.69
1224		LG		lg	5		I	4	Wilkins Peak	mudstone	interior		overbank	mix	C	in		41.5509	-109.418	1 White Mountain	467.5		Wilkins Peak Member		18																		125	94995.6	2220.8	11.7	5.53	575.98	40.13
1225		LG		lg	5		I	4	Wilkins Peak	mudstone	interior		overbank	mix	C	in		41.5509	-109.418	1 White Mountain	467		Wilkins Peak Member		18																		125	86159.5	2138.29	12.95	5.83	676.9	41.52
1226		LG		lg	3.5	vf	I	4	Wilkins Peak	sandstone	interior		overbank	mix	C	in		41.5509	-109.418	1 White Mountain	466.5		Wilkins Peak Member		20																		125	68354.8	1774.34	12.54	5.95	743.05	46.16
1227		LG		lg	5		I	4	Wilkins Peak	mudstone	interior		overbank	mix	C	in		41.5509	-109.418	1 White Mountain	466		Wilkins Peak Member		18																		125	89171.6	2356.81	14.64	5.5	514.76	40.2
1228		LG		lg	5		I	4	Wilkins Peak	mudstone	interior		overbank	mix	C	in		41.5509	-109.418	1 White Mountain	465.5		Wilkins Peak Member		18																		125	59014.1	2087.33	21.81	10.16	825.97	44.12
1229		LG		lg	3.5	vf	I	4	Wilkins Peak	sandstone	interior		overbank	mix	C	in		41.5509	-109.418	1 White Mountain	465		Wilkins Peak Member		17																		125	88213.9	2157.4	41.08	7.07	628.65	40.74
1230		LG		lg	3.5	vf	I	4	Wilkins Peak	sandstone	interior		overbank	mix	C	in		41.5509	-109.418	1 White Mountain	464.5		Wilkins Peak Member		20																		125	59647.9	1844.33	13.85	5.91	846.46	45.7
1231		LG		lg	5		I	4	Wilkins Peak	mudstone	interior		overbank	mix	C	in		41.5509	-109.418	1 White Mountain	464		Wilkins Peak Member		18																		125	77744.5	2255.55	25.25	6.54	580.35	41.8
1232		LG		lg	5		I	4	Wilkins Peak	mudstone	interior		overbank	mix	C	in		41.5509	-109.418	1 White Mountain	463.5		Wilkins Peak Member		19																		125	72074.4	2132.2	55.79	7.62	626.03	45.6
1233		LG		lg	4			4	Wilkins Peak	carbonate	interior		palustrine	mix	C	in		41.5509	-109.418	1 White Mountain	463		Wilkins Peak Member		1																		125	42072.7	1706.45	19.09	7.09	537.73	50.45
1234		LG		lg	4			4	Wilkins Peak	carbonate	interior		palustrine	mix	C	in		41.5509	-109.418	1 White Mountain	462.5		Wilkins Peak Member		1																		125	44591.8	1940.05	0	7.89	569.17	44.33
1235		LG		lg	4			4	Wilkins Peak	carbonate	interior		palustrine	mix	C	in		41.5509	-109.418	1 White Mountain	462		Wilkins Peak Member		1																		125	34696.7	1879.67	0	8.95	623.47	41.2
1236		LG		lg	4			4	Wilkins Peak	carbonate	interior		palustrine	mix	C	in		41.5509	-109.418	1 White Mountain	461.5		Wilkins Peak Member		3																		125	13071.9	1194.96	0	6.51	1815.76	57.85
1237		LG		lg	4			4	Wilkins Peak	carbonate	interior		palustrine	mix	C	in		41.5509	-109.418	1 White Mountain	461		Wilkins Peak Member		1																		125	46886.2	1859.65	0	8.78	577.61	39.72
1238		LG		lg	4			4	Wilkins Peak	carbonate	interior		palustrine	mix	C	in		41.5509	-109.418	1 White Mountain	460.5		Wilkins Peak Member		3																		125	10188.2	1066.04	0	8.06	1719.06	49.78
1239		LG		lg	4			4	Wilkins Peak	carbonate	interior		palustrine	mix	C	in		41.5509	-109.418	1 White Mountain	460		Wilkins Peak Member		3																		125	16063.8	1317.54	0	8.26	1533.68	49.51
1240		LG		lg	4			4	Wilkins Peak	carbonate	interior		palustrine	mix	C	in		41.5509	-109.418	1 White Mountain	459.5		Wilkins Peak Member		1																		125	12333.8	762.45	20.13	4.68	333.73	33.58
1241		LG		lg	4			4	Wilkins Peak	carbonate	interior		palustrine	mix	C	in		41.5509	-109.418	1 White Mountain	459		Wilkins Peak Member		1																		125	68883.6	2040.31	43.23	6.12	300.02	37.87
1242		LG		lg	4			4	Wilkins Peak	carbonate	interior		palustrine	mix	C	in		41.5509	-109.418	1 White Mountain	458.5		Wilkins Peak Member		1																		125	32091	1632.67	11.71	5.3	2093.14	57.48
1243		LG		lg	4			4	Wilkins Peak	carbonate	interior		palustrine	mix	C	in		41.5509	-109.418	1 White Mountain	458		Wilkins Peak Member		1																		125	14727.2	1030.13	15.19	4.8	546.07	36.47
1244		LG		lg	4			4	Wilkins Peak	carbonate	interior		palustrine	mix	C	in		41.5509	-109.418	1 White Mountain	457.5		Wilkins Peak Member		1																		125	55610.9	1839.95	61.19	6.98	1908.77	47.9
1245		LG		lg	5		I	4	Wilkins Peak	mudstone	interior		overbank	mix	C	in		41.5509	-109.418	1 White Mountain	457		Wilkins Peak Member		18																		125	18402.8	1035.16	0	6.66	284.86	33.35
1246		LG		lg	5		I	4	Wilkins Peak	mudstone	interior		overbank	mix	C	in		41.5509	-109.418	1 White Mountain	456.5		Wilkins Peak Member		18																		125	16022.9	1072.71	0	10.53	404.89	41.82
1247		LG		lg	5		I	4	Wilkins Peak	mudstone	interior		overbank	mix	C	in		41.5509	-109.418	1 White Mountain	456		Wilkins Peak Member		18																		125	31220.7	1455.57	0	9.35	433.22	38.18
1248		LG		lg	5		I	4	Wilkins Peak	mudstone	interior		overbank	mix	C	in		41.5509	-109.418	1 White Mountain	455.5		Wilkins Peak Member		18																		125	38748.4	1600.08	0	9.64	443.71	41.64
1249		LG		lg	5		I	4	Wilkins Peak	mudstone	interior		overbank	mix	C	in		41.5509	-109.418	1 White Mountain	455		Wilkins Peak Member		18																		125	23431.6	1471.12	9.52	5.04	1022.7	48.23
1250		LG		lg	5		I	4	Wilkins Peak	mudstone	interior		overbank	mix	C	in		41.5509	-109.418	1 White Mountain	454.5		Wilkins Peak Member		19																		125	29692.8	1433.77	8.87	5.86	545.83	46.36
1251		LG		lg	5		I	4	Wilkins Peak	mudstone	interior		overbank	mix	C	in		41.5509	-109.418	1 White Mountain	454		Wilkins Peak Member		18																		125	21155.3	1329.28	0	6.56	731.81	49.11
1252		LG		lg	5		I	4	Wilkins Peak	mudstone	interior		overbank	mix	C	in		41.5509	-109.418	1 White Mountain	453.5		Wilkins Peak Member		18																		125	27232.8	1823.37	0	7.57	475.91	44.72
1253		LG		lg	3			4	Wilkins Peak	tuff	interior		tuff	mix	C	in		41.5509	-109.418	1 White Mountain	453		Wilkins Peak Member																				125	42053.8	1750.13	30.92	6.76	689.93	46.67
1254		LG		lg	5		I	4	Wilkins Peak	mudstone	interior		overbank	mix	C	in		41.5509	-109.418	1 White Mountain	452.5		Wilkins Peak Member		18																		125	45995.8	1907.24	0	11.39	539.18	42.29
1255		LG		lg	4			4	Wilkins Peak	carbonate	interior		palustrine	mix	C	in		41.5509	-109.418	1 White Mountain	452		Wilkins Peak Member		1																		125	37550.7	1866.07	0	7.54	552.85	44.97
1256		LG		lg	5		I	4	Wilkins Peak	mudstone	interior		overbank	mix	C	in		41.5509	-109.418	1 White Mountain	451.5		Wilkins Peak Member		18																		125	67851.6	2215.27	0	8.05	490.25	40.24
1257		LG		lg	4			4	Wilkins Peak	carbonate	interior		palustrine	mix	C	in		41.5509	-109.418	1 White Mountain	451		Wilkins Peak Member		1																		125	43079.6	2066.14	0	10.83	554.42	43.17
1258		LG		lg	4			4	Wilkins Peak	carbonate	interior		palustrine	mix	C	in		41.5509	-109.418	1 White Mountain	450.5		Wilkins Peak Member		3																		125	28460.7	1634.21	8.48	5.21	652.25	42.19
1259		LG		lg	3			4	Wilkins Peak	carbonate	interior		littoral	mix	C	in		41.5509	-109.418	1 White Mountain	450		Wilkins Peak Member		10																		125	22795.3	1700.52	0	7.98	558.95	44.68
1260		LG		lg	5			4	Wilkins Peak	carbonate	interior		profundal	mix	C	in		41.5509	-109.418	1 White Mountain	449.5		Wilkins Peak Member		13																		125	16269.5	1027.36	17.64	5.44	324.62	39.47
1261		LG		lg	4			4	Wilkins Peak	carbonate	interior		palustrine	mix	C	in		41.5509	-109.418	1 White Mountain	449		Wilkins Peak Member		4																		125	42745.9	1936.12	30.44	5.71	511.36	39.28
1262		LG		lg	4			4	Wilkins Peak	carbonate	interior		palustrine	mix	C	in		41.5509	-109.418	1 White Mountain	448.5		Wilkins Peak Member		1																		125	43487.5	1705.5	18.97	5.41	413.5	35.81
1263		LG		lg	4			4	Wilkins Peak	carbonate	interior		palustrine	mix	C	in		41.5509	-109.418	1 White Mountain	448		Wilkins Peak Member		1																		125	32527.2	1542.43	16.34	5.31	533.54	44.43
1264		LG		lg	4			4	Wilkins Peak	carbonate	interior		palustrine	mix	C	in		41.5509	-109.418	1 White Mountain	447.5		Wilkins Peak Member		1																		125	26248.5	1558.23	0	10.75	707.36	46.69
1265		LG		lg	4			4	Wilkins Peak	carbonate	interior		palustrine	mix	C	in		41.5509	-109.418	1 White Mountain	447		Wilkins Peak Member		2																		125	41430.5	1803.74	0	8.49	670.79	37.53
1266		LG		lg	4			4	Wilkins Peak	carbonate	interior		palustrine	mix	C	in		41.5509	-109.418	1 White Mountain	446.5		Wilkins Peak Member		2																		125	43926.6	1951.19	8.47	4.92	696.29	40.16
1267		LG		lg	4			4	Wilkins Peak	carbonate	interior		palustrine	mix	C	in		41.5509	-109.418	1 White Mountain	446		Wilkins Peak Member		2																		125	43511	1926.38	8.79	5.05	760.82	42.24
1268		LG		lg	4			4	Wilkins Peak	carbonate	interior		palustrine	mix	C	in		41.5509	-109.418	1 White Mountain	445.5		Wilkins Peak Member		2																		125	39450.8	1780.75	8.57	5.38	730.66	44.3
1269		LG		lg	4			4	Wilkins Peak	carbonate	interior		palustrine	mix	C	in		41.5509	-109.418	1 White Mountain	445		Wilkins Peak Member		1																		125	31212.5	1651.21	0	10.56	646.11	43.38
1270		LG		lg	4			4	Wilkins Peak	carbonate	interior		palustrine	mix	C	in		41.5509	-109.418	1 White Mountain	444.5		Wilkins Peak Member		1																		125	48037.4	1972.13	14.67	5.68	746.45	42.63
1271		LG		lg	4			4	Wilkins Peak	carbonate	interior		palustrine	mix	C	in		41.5509	-109.418	1 White Mountain	444		Wilkins Peak Member		1																		125	34102.5	1860.34	0	9.01	500.21	40.52
1272		LG		lg	3			4	Wilkins Peak	carbonate	interior		littoral	mix	C	in		41.5509	-109.418	1 White Mountain	443.5		Wilkins Peak Member		10																		125	13191.1	1274.09	9.55	5.07	1321.43	49.73
1273		LG		lg	5			4	Wilkins Peak	carbonate	interior		profundal	mix	C	in		41.5509	-109.418	1 White Mountain	443		Wilkins Peak Member		13																		125	56798.2	2029.72	16.27	5.98	467.68	38.37
1274		LG		lg	5			4	Wilkins Peak	carbonate	interior		profundal	mix	C	in		41.5509	-109.418	1 White Mountain	442.5		Wilkins Peak Member		13																		125	58570	2080.37	0	10.1	805.84	45.71
1275		LG		lg	5			4	Wilkins Peak	carbonate	interior		profundal	mix	C	in		41.5509	-109.418	1 White Mountain	442		Wilkins Peak Member		13																		125	78713.9	2428.51	10.5	5.73	535.15	39.77
1276		LG		lg	3			4	Wilkins Peak	tuff	interior		tuff	mix	C	in		41.5509	-109.418	1 White Mountain	441.5		Wilkins Peak Member																				125	37353.9	1912.1	12.92	5.62	514.86	40.58
1277		LG		lg	4			4	Wilkins Peak	carbonate	interior		palustrine	mix	C	in		41.5509	-109.418	1 White Mountain	441		Wilkins Peak Member		1																		125	27129.8	1713.39	11.88	5.36	699.19	44
1278		LG		lg	4			4	Wilkins Peak	carbonate	interior		palustrine	mix	C	in		41.5509	-109.418	1 White Mountain	440.5		Wilkins Peak Member		1																		125	68744.6	2378.78	71.63	7.26	419.06	39.93
1279		LG		lg	4			4	Wilkins Peak	carbonate	interior		palustrine	mix	C	in		41.5509	-109.418	1 White Mountain	440		Wilkins Peak Member		1																		125	68791.7	2371.97	31.2	6.42	558.58	41.11
1280		LG		lg	4			4	Wilkins Peak	carbonate	interior		palustrine	mix	C	in		41.5509	-109.418	1 White Mountain	439.5		Wilkins Peak Member		1																		125	66111.7	2582.02	8.75	5.58	838.21	44.61
1281		LG		lg	4			4	Wilkins Peak	carbonate	interior		palustrine	mix	C	in		41.5509	-109.418	1 White Mountain	439		Wilkins Peak Member		1																		125	26465.9	1688.33	0	7.93	519.04	43.28
1282		LG		lg	4			4	Wilkins Peak	carbonate	interior		palustrine	mix	C	in		41.5509	-109.418	1 White Mountain	438.5		Wilkins Peak Member		1																		125	55556.9	2288.25	30.62	5.79	481.19	39.35
1283		LG		lg	4			4	Wilkins Peak	carbonate	interior		palustrine	mix	C	in		41.5509	-109.418	1 White Mountain	438		Wilkins Peak Member		1																		125	43076	2053.91	29.71	5.94	529.77	42.01
1284		LG		lg	4			4	Wilkins Peak	carbonate	interior		palustrine	mix	C	in		41.5509	-109.418	1 White Mountain	437.5		Wilkins Peak Member		1																		125	36156.9	1834.91	21.13	5.39	555.13	40.12
1285		LG		lg	5			4	Wilkins Peak	carbonate	interior		profundal	mix	C	in		41.5509	-109.418	1 White Mountain	437		Wilkins Peak Member		13																		125	21946	1607.59	0	9.92	511.83	38.67
1286		LG		lg	3			4	Wilkins Peak	tuff	interior		tuff	mix	C	in		41.5509	-109.418	1 White Mountain	436.5		Wilkins Peak Member																				125	59311.2	1681.08	34.09	7.45	3948.35	80.45
1287		LG		lg	5			4	Wilkins Peak	carbonate	interior		profundal	mix	C	in		41.5509	-109.418	1 White Mountain	436		Wilkins Peak Member		13																		125	23075.3	1220.96	8.17	5.3	442.81	40.91
1288		LG		lg	5			4	Wilkins Peak	carbonate	interior		profundal	mix	C	in		41.5509	-109.418	1 White Mountain	435.5		Wilkins Peak Member		13																		125	41377.9	1687.22	0	8.07	588.46	41.34
1289		LG		lg	5			4	Wilkins Peak	carbonate	interior		profundal	mix	C	in		41.5509	-109.418	1 White Mountain	435		Wilkins Peak Member		13																		125	12449	1011.61	0	6.85	328.05	35.1
1290		LG		lg	5			4	Wilkins Peak	carbonate	interior		profundal	mix	C	in		41.5509	-109.418	1 White Mountain	434.5		Wilkins Peak Member		13																		125	26160.1	1494.84	0	7.48	532.26	37.8
1291		LG		lg	4			4	Wilkins Peak	carbonate	interior		palustrine	mix	C	in		41.5509	-109.418	1 White Mountain	434		Wilkins Peak Member		1																		125	25126.6	1607.95	0	7.62	429.94	41.03
1292		LG		lg	4			4	Wilkins Peak	carbonate	interior		palustrine	mix	C	in		41.5509	-109.418	1 White Mountain	433.5		Wilkins Peak Member		1																		125	29562.5	1899.52	0	9.31	938.78	49.01
1293		LG		lg	4			4	Wilkins Peak	carbonate	interior		palustrine	mix	C	in		41.5509	-109.418	1 White Mountain	433		Wilkins Peak Member		1																		125	18608.2	1477.65	0	6.87	480.82	41.72
1294		LG		lg	4			4	Wilkins Peak	carbonate	interior		palustrine	mix	C	in		41.5509	-109.418	1 White Mountain	432.5		Wilkins Peak Member		1																		125	15948.2	1492.14	0	9.08	952.1	45.49
1295		LG		lg	4			4	Wilkins Peak	carbonate	interior		palustrine	mix	C	in		41.5509	-109.418	1 White Mountain	432		Wilkins Peak Member		1																		125	15594.4	1392.18	0	8.3	392.4	51.49
1296		LG		lg	4			4	Wilkins Peak	carbonate	interior		palustrine	mix	C	in		41.5509	-109.418	1 White Mountain	431.5		Wilkins Peak Member		1																		125	46463.4	2053.37	0	6.16	513.76	38.2
1297		LG		lg	5			4	Wilkins Peak	carbonate	interior		profundal	mix	C	in		41.5509	-109.418	1 White Mountain	431		Wilkins Peak Member		13																		125	23496.1	1218.83	0	6.97	350.99	31.07
1298		LG		lg	5			4	Wilkins Peak	carbonate	interior		profundal	mix	C	in		41.5509	-109.418	1 White Mountain	430.5		Wilkins Peak Member		13																		125	12891.2	1156.56	0	9.52	516.67	42.07
1299		LG		lg	5			4	Wilkins Peak	carbonate	interior		profundal	mix	C	in		41.5509	-109.418	1 White Mountain	430		Wilkins Peak Member		13																		125	14737.4	1142.02	0	6.63	452.14	38.31
1300		LG		lg	3			4	Wilkins Peak	carbonate	interior		littoral	mix	C	in		41.5509	-109.418	1 White Mountain	429.5		Wilkins Peak Member		7																		125	24387.1	1614.11	0	10.38	320.79	39.65
1301		LG		lg	3			4	Wilkins Peak	carbonate	interior		littoral	mix	C	in		41.5509	-109.418	1 White Mountain	429		Wilkins Peak Member		7																		125	14460.2	1363.88	0	7.87	477.14	58.5
1302		LG		lg	4			4	Wilkins Peak	carbonate	interior		palustrine	mix	C	in		41.5509	-109.418	1 White Mountain	428.5		Wilkins Peak Member		1																		125	24207.5	1566.76	0	9.47	451.52	43.13
1303		LG		lg	4			4	Wilkins Peak	carbonate	interior		palustrine	mix	C	in		41.5509	-109.418	1 White Mountain	428		Wilkins Peak Member		1																		125	14664.5	1333.23	0	9.1	678.75	48.62
1304		LG		lg	5			4	Wilkins Peak	carbonate	interior		profundal	mix	C	in		41.5509	-109.418	1 White Mountain	427.5		Wilkins Peak Member		12																		125	26873.2	1505.84	0	8.51	439.7	42.6
1305		LG		lg	5			4	Wilkins Peak	carbonate	interior		profundal	mix	C	in		41.5509	-109.418	1 White Mountain	427		Wilkins Peak Member		12																		125	21651.4	1408.82	0	7.03	442.91	43.38
1306		LG		lg	5			4	Wilkins Peak	carbonate	interior		profundal	mix	C	in		41.5509	-109.418	1 White Mountain	426.5		Wilkins Peak Member		12																		125	61568.3	2051.74	8.72	5.32	394.85	38.61
1307		LG		lg	5			4	Wilkins Peak	carbonate	interior		profundal	mix	C	in		41.5509	-109.418	1 White Mountain	426		Wilkins Peak Member		12																		125	30601.6	1498.45	0	6.03	387.82	38.07
1308		LG		lg	5			4	Wilkins Peak	carbonate	interior		profundal	mix	C	in		41.5509	-109.418	1 White Mountain	425.5		Wilkins Peak Member		12																		125	70080	2131.63	0	11.13	336.91	39.97
1309		LG		lg	5			4	Wilkins Peak	carbonate	interior		profundal	mix	C	in		41.5509	-109.418	1 White Mountain	425		Wilkins Peak Member		12																		125	43958.5	1602.72	0	6.97	410.23	35.74
1310		LG		lg	5			4	Wilkins Peak	carbonate	interior		profundal	mix	C	in		41.5509	-109.418	1 White Mountain	424.5		Wilkins Peak Member		12																		125	12686	1547.17	0	6.61	527.34	48.34
1311		LG		lg	5			4	Wilkins Peak	carbonate	interior		profundal	mix	C	in		41.5509	-109.418	1 White Mountain	424		Wilkins Peak Member		12																		125	39593.9	1532.48	0	9.75	402.93	35.49
1312		LG		lg	5			4	Wilkins Peak	carbonate	interior		profundal	mix	C	in		41.5509	-109.418	1 White Mountain	423.5		Wilkins Peak Member		12																		125	18508.7	1727.54	0	6.55	460.15	46.76
1313		LG		lg	5			4	Wilkins Peak	carbonate	interior		profundal	mix	C	in		41.5509	-109.418	1 White Mountain	423		Wilkins Peak Member		12																		125	22340.4	1339.8	0	8.19	493.04	44.9
1314		LG		lg	4			4	Wilkins Peak	carbonate	interior		palustrine	mix	C	in		41.5509	-109.418	1 White Mountain	422.5		Wilkins Peak Member		3																		125	27491.5	1620.57	0	8.38	493.23	47.29
1315		LG		lg	4			4	Wilkins Peak	carbonate	interior		palustrine	mix	C	in		41.5509	-109.418	1 White Mountain	422		Wilkins Peak Member		1																		125	25425.5	1489.14	0	13.17	412.62	47.3
1316		LG		lg	4			4	Wilkins Peak	carbonate	interior		palustrine	mix	C	in		41.5509	-109.418	1 White Mountain	421.5		Wilkins Peak Member		3																		125	22335	1392.8	0	7.37	486.32	42.5
1317		LG		lg	5			4	Wilkins Peak	carbonate	interior		profundal	mix	C	in		41.5509	-109.418	1 White Mountain	421		Wilkins Peak Member		12																		125	20148.6	1251.2	10	5.03	380.41	45.28
1318		LG		lg	5			4	Wilkins Peak	carbonate	interior		profundal	mix	C	in		41.5509	-109.418	1 White Mountain	420.5		Wilkins Peak Member		12																		125	19770.9	1397.17	0	7.37	662	44.9
1319		LG		lg	5			4	Wilkins Peak	carbonate	interior		profundal	mix	C	in		41.5509	-109.418	1 White Mountain	420		Wilkins Peak Member		12																		125	33442	1588.71	0	11.18	372.93	41.76
1320		LG		lg	5			4	Wilkins Peak	carbonate	interior		profundal	mix	C	in		41.5509	-109.418	1 White Mountain	419.5		Wilkins Peak Member		12																		125	19232.9	1257.62	31.61	6.64	401.85	43.45
1321		LG		lg	5			4	Wilkins Peak	carbonate	interior		profundal	mix	C	in		41.5509	-109.418	1 White Mountain	419		Wilkins Peak Member		12																		125	10572.2	1300.96	0	6.82	697.32	45.52
1322		LG		lg	3			4	Wilkins Peak	tuff	interior		tuff	mix	C	in		41.5509	-109.418	1 White Mountain	418.5		Wilkins Peak Member																				125	109730	2574.38	0	9.23	138.83	36.39
1323		LG		lg	5			4	Wilkins Peak	carbonate	interior		profundal	mix	C	in		41.5509	-109.418	1 White Mountain	418		Wilkins Peak Member		12																		125	66822.2	1958.98	0	8.74	377.94	36.43
1324		LG		lg	5			4	Wilkins Peak	carbonate	interior		profundal	mix	C	in		41.5509	-109.418	1 White Mountain	417.5		Wilkins Peak Member		11																		125	15100.9	1343.17	0	7	515.47	49.63
1325		LG		lg	5			4	Wilkins Peak	carbonate	interior		profundal	mix	C	in		41.5509	-109.418	1 White Mountain	417		Wilkins Peak Member		11																		125	21365.2	1483.06	0	5.53	373.96	38.85
1326		LG		lg	4			4	Wilkins Peak	carbonate	interior		palustrine	mix	C	in		41.5509	-109.418	1 White Mountain	416.5		Wilkins Peak Member		1																		125	8256.56	1381.87	0	8.7	537.35	49.93
1327		LG		lg	4			4	Wilkins Peak	carbonate	interior		palustrine	mix	C	in		41.5509	-109.418	1 White Mountain	416		Wilkins Peak Member		1																		125	27068.9	1650.09	0	6.2	452.6	38.41
1328		LG		lg	5			4	Wilkins Peak	carbonate	interior		profundal	mix	C	in		41.5509	-109.418	1 White Mountain	415.5		Wilkins Peak Member		12																		125	29767.3	1513.41	0	10.18	374.47	36.73
1329		LG		lg	5			4	Wilkins Peak	carbonate	interior		profundal	mix	C	in		41.5509	-109.418	1 White Mountain	415		Wilkins Peak Member		12																		125	14039.7	1078.21	0	6.37	401.03	44.94
1330		LG		lg	5			4	Wilkins Peak	carbonate	interior		profundal	mix	C	in		41.5509	-109.418	1 White Mountain	414.5		Wilkins Peak Member		13																		125	13801.3	1122.18	0	6.91	923.48	50.08
1331		LG		lg	5			4	Wilkins Peak	carbonate	interior		profundal	mix	C	in		41.5509	-109.418	1 White Mountain	414		Wilkins Peak Member		13																		125	18943.5	1366.63	0	9.49	506.08	42.31
1332		LG		lg	5			4	Wilkins Peak	carbonate	interior		profundal	mix	C	in		41.5509	-109.418	1 White Mountain	413.5		Wilkins Peak Member		13																		125	34788.5	1827.29	0	10.3	689.76	43.9
1333		LG		lg	5			4	Wilkins Peak	carbonate	interior		profundal	mix	C	in		41.5509	-109.418	1 White Mountain	413		Wilkins Peak Member		13																		125	36594.3	1361.42	0	7.21	479.51	34.81
1334		LG		lg	5			4	Wilkins Peak	carbonate	interior		profundal	mix	C	in		41.5509	-109.418	1 White Mountain	412.5		Wilkins Peak Member		13																		125	65332.8	1775.27	87.86	7.97	400.22	39.04
1335		LG		lg	5			4	Wilkins Peak	carbonate	interior		profundal	mix	C	in		41.5509	-109.418	1 White Mountain	412		Wilkins Peak Member		12																		125	46853.8	1786.29	20.34	5.41	395.96	38.29
1336		LG		lg	5			4	Wilkins Peak	carbonate	interior		profundal	mix	C	in		41.5509	-109.418	1 White Mountain	411.5		Wilkins Peak Member		12																		125	26688.1	1590.74	0	8.56	414.7	46.66
1337		LG		lg	5			4	Wilkins Peak	carbonate	interior		profundal	mix	C	in		41.5509	-109.418	1 White Mountain	411		Wilkins Peak Member		12																		125	58701.6	1824.04	56.7	6.48	424.8	36.35
1338		LG		lg	5			4	Wilkins Peak	carbonate	interior		profundal	mix	C	in		41.5509	-109.418	1 White Mountain	410.5		Wilkins Peak Member		12																		125	111862	2744.21	15.14	5.89	313.77	37.36
1339		LG		lg	5			4	Wilkins Peak	carbonate	interior		profundal	mix	C	in		41.5509	-109.418	1 White Mountain	410		Wilkins Peak Member		12																		125	15286.3	1289.89	10.68	5.92	659.67	52.34
1340		LG		lg	5			4	Wilkins Peak	carbonate	interior		profundal	mix	C	in		41.5509	-109.418	1 White Mountain	409.5		Wilkins Peak Member		12																		125	20274.2	1368.21	16.89	5.98	408.29	44.27
1341		LG		lg	5			4	Wilkins Peak	carbonate	interior		profundal	mix	C	in		41.5509	-109.418	1 White Mountain	409		Wilkins Peak Member		12																		125	33040.1	1571.91	45.96	6.6	498.83	40.47
1342		LG		lg	5			4	Wilkins Peak	carbonate	interior		profundal	mix	C	in		41.5509	-109.418	1 White Mountain	408.5		Wilkins Peak Member		12																		125	21145.7	1371.83	14.7	5.72	435.75	47.15
1343		LG		lg	5			4	Wilkins Peak	carbonate	interior		profundal	mix	C	in		41.5509	-109.418	1 White Mountain	408		Wilkins Peak Member		12																		125	29426.7	1537.92	16.83	5.63	375.72	41.45
1344		LG		lg	5			4	Wilkins Peak	carbonate	interior		profundal	mix	C	in		41.5509	-109.418	1 White Mountain	498.5		Wilkins Peak Member		12																		125	30518.4	1496.29	0	9.65	806.02	39.67
1345		LG		lg	5			4	Wilkins Peak	carbonate	interior		profundal	mix	C	in		41.5509	-109.418	1 White Mountain	499		Wilkins Peak Member		13																		125	2875.76	985.77	0	4.97	397.16	39.68
1346		LG		lg	5			4	Wilkins Peak	carbonate	interior		profundal	mix	C	in		41.5509	-109.418	1 White Mountain	499.5		Wilkins Peak Member		13																		125	21356	1182.51	0	6.36	276.57	35.11
1347		LG		lg	5			4	Wilkins Peak	carbonate	interior		profundal	mix	C	in		41.5509	-109.418	1 White Mountain	500		Wilkins Peak Member		13																		125	16193.5	991.42	0	8.3	347.65	44.13
1348		LG		lg	5			4	Wilkins Peak	carbonate	interior		profundal	mix	C	in		41.5509	-109.418	1 White Mountain	500.5		Wilkins Peak Member		13																		125	43289.3	1658.11	0	6.94	664.67	39.82
1349		LG		lg	5			4	Wilkins Peak	carbonate	interior		profundal	mix	C	in		41.5509	-109.418	1 White Mountain	501		Wilkins Peak Member		13																		125	24880.4	1293.19	13.74	5.11	367.02	36.17
1350		LG		lg	5			4	Wilkins Peak	carbonate	interior		profundal	mix	C	in		41.5509	-109.418	1 White Mountain	501.5		Wilkins Peak Member		12																		125	29512	1117.74	66.28	6.42	170.77	30.61
1351		LG		lg	3			4	Wilkins Peak	carbonate	interior		littoral	mix	C	in		41.5509	-109.418	1 White Mountain	502		Wilkins Peak Member		8																		125	39292.5	1891.85	76.84	7.27	306.6	39.04
1352		LG		lg	3			4	Wilkins Peak	carbonate	interior		littoral	mix	C	in		41.5509	-109.418	1 White Mountain	503		Wilkins Peak Member		8																		125	20071.3	1652.88	64.85	7.38	2135.63	54.9
1353		LG		lg	3			4	Wilkins Peak	carbonate	interior		littoral	mix	C	in		41.5509	-109.418	1 White Mountain	503.5		Wilkins Peak Member		8																		125	70738.2	1789.55	314.11	11.53	462.29	37.47
1354		LG		lg	3			4	Wilkins Peak	carbonate	interior		littoral	mix	C	in		41.5509	-109.418	1 White Mountain	504		Wilkins Peak Member		8																		125	103796	2199.38	117.48	8.07	516	37.72
1355		LG		lg	4			4	Wilkins Peak	carbonate	interior		palustrine	mix	C	in		41.5509	-109.418	1 White Mountain	504.5		Wilkins Peak Member		1																		125	11826.1	710.14	7.96	4.98	256.21	45.41
1356		LG		lg	4			4	Wilkins Peak	carbonate	interior		palustrine	mix	C	in		41.5509	-109.418	1 White Mountain	505		Wilkins Peak Member		1																		125	25957.9	990.67	0	7.43	217.32	30.79
1357		LG		lg	4			4	Wilkins Peak	carbonate	interior		palustrine	mix	C	in		41.5509	-109.418	1 White Mountain	505.5		Wilkins Peak Member		1																		125	24378.2	1731.1	0	6.54	447.95	45.45
1358		LG		lg	4			4	Wilkins Peak	carbonate	interior		palustrine	mix	C	in		41.5509	-109.418	1 White Mountain	506		Wilkins Peak Member		1																		125	44146.4	1287.25	0	10.38	309.35	36.55
1359		LG		lg	4			4	Wilkins Peak	carbonate	interior		palustrine	mix	C	in		41.5509	-109.418	1 White Mountain	506.5		Wilkins Peak Member		1																		125	33532.9	1310.51	0	9.18	274.61	32.83
1360		LG		lg	4			4	Wilkins Peak	carbonate	interior		palustrine	mix	C	in		41.5509	-109.418	1 White Mountain	507		Wilkins Peak Member		1																		125	9142.87	1318.4	0	9.4	420.53	50.06
1361		LG		lg	4			4	Wilkins Peak	carbonate	interior		palustrine	mix	C	in		41.5509	-109.418	1 White Mountain	507.5		Wilkins Peak Member		1																		125	10833.2	1298.82	0	7.22	416.51	54.18
1362		LG		lg	4			4	Wilkins Peak	carbonate	interior		palustrine	mix	C	in		41.5509	-109.418	1 White Mountain	508		Wilkins Peak Member		1																		125	10214.6	969.3	0	5.35	368.99	38.27
1363		LG		lg	5			4	Wilkins Peak	carbonate	interior		profundal	mix	C	in		41.5509	-109.418	1 White Mountain	508.5		Wilkins Peak Member		12																		125	35723	1602.25	0	9.35	397.27	36.74
1364		LG		lg	5			4	Wilkins Peak	carbonate	interior		profundal	mix	C	in		41.5509	-109.418	1 White Mountain	509		Wilkins Peak Member		12																		125	35146.8	1614.35	0	9.75	377.44	37.04
1365		LG		lg	5			4	Wilkins Peak	carbonate	interior		profundal	mix	C	in		41.5509	-109.418	1 White Mountain	509.5		Wilkins Peak Member		12																		125	18067.8	1244.8	0	7.76	383.48	43.33
1366		LG		lg	5			4	Wilkins Peak	carbonate	interior		profundal	mix	C	in		41.5509	-109.418	1 White Mountain	510		Wilkins Peak Member		12																		125	31640.8	1562.27	0	8.53	404.24	39.15
1367		LG		lg	5			4	Wilkins Peak	carbonate	interior		profundal	mix	C	in		41.5509	-109.418	1 White Mountain	510.5		Wilkins Peak Member		12																		125	31356.7	1497.4	0	8.21	418.68	37.8
1368		LG		lg	5			4	Wilkins Peak	carbonate	interior		profundal	mix	C	in		41.5509	-109.418	1 White Mountain	511		Wilkins Peak Member		12																		125	30477.7	1192.41	0	5.53	299.7	32.8
1369		LG		lg	5			4	Wilkins Peak	carbonate	interior		profundal	mix	C	in		41.5509	-109.418	1 White Mountain	511.5		Wilkins Peak Member		12																		125	4574.85	943.97	0	7.08	470.18	56.35
1370		LG		lg	5			4	Wilkins Peak	carbonate	interior		profundal	mix	C	in		41.5509	-109.418	1 White Mountain	512		Wilkins Peak Member		12																		125	5713.34	797.97	0	7.36	365.37	44.75
1371		LG		lg	5			4	Wilkins Peak	carbonate	interior		profundal	mix	C	in		41.5509	-109.418	1 White Mountain	512.5		Wilkins Peak Member		12																		125	6501.32	1102.18	0	11.34	503.63	50.45
1372		LG		lg	5			4	Wilkins Peak	carbonate	interior		profundal	mix	C	in		41.5509	-109.418	1 White Mountain	513		Wilkins Peak Member		12																		125	16770.3	744	0	5.31	86.8	28.99
1373		LG		lg	5			4	Wilkins Peak	carbonate	interior		profundal	mix	C	in		41.5509	-109.418	1 White Mountain	513.5		Wilkins Peak Member		13																		125	26602.6	983.86	0	7.83	773.2	30.13
1374		LG		lg	5			4	Wilkins Peak	carbonate	interior		profundal	mix	C	in		41.5509	-109.418	1 White Mountain	514		Wilkins Peak Member		13																		125	4900.01	1239.53	0	11.6	443.93	51.95
1375		LG		lg	5			4	Wilkins Peak	carbonate	interior		profundal	mix	C	in		41.5509	-109.418	1 White Mountain	514.5		Wilkins Peak Member		13																		125	38514.5	1355.09	0	8.49	636.88	40.92
1376		LG		lg	5			4	Wilkins Peak	carbonate	interior		profundal	mix	C	in		41.5509	-109.418	1 White Mountain	515		Wilkins Peak Member		13																		125	8529.21	1232.21	0	8.4	350.9	48.97
1377		LG		lg	5			4	Wilkins Peak	carbonate	interior		profundal	mix	C	in		41.5509	-109.418	1 White Mountain	515.5		Wilkins Peak Member		13																		125	6876.42	943.43	0	7.88	399.13	46.79
1378		LG		lg	5			4	Wilkins Peak	carbonate	interior		profundal	mix	C	in		41.5509	-109.418	1 White Mountain	516		Wilkins Peak Member		13																		125	15534.6	1169.69	0	6.77	321.9	34.73
1379		LG		lg	5			4	Wilkins Peak	carbonate	interior		profundal	mix	C	in		41.5509	-109.418	1 White Mountain	516.5		Wilkins Peak Member		13																		125	11140	865.7	0	7.09	519.84	42.3
1380		LG		lg	3			4	Wilkins Peak	tuff	interior		tuff	mix	C	in		41.5509	-109.418	1 White Mountain	517		Wilkins Peak Member																				125	71947.8	1884.03	0	8.86	1354.18	48.96
1381		LG		lg	3			4	Wilkins Peak	tuff	interior		tuff	mix	C	in		41.5509	-109.418	1 White Mountain	517.5		Wilkins Peak Member																				125	37214.6	1382.47	0	10.5	393.28	59.52
1382		LG		lg	5			4	Wilkins Peak	carbonate	interior		profundal	mix	C	in		41.5509	-109.418	1 White Mountain	518		Wilkins Peak Member		12																		125	5921.38	1108.04	0	12.41	361.81	56.62
1383		LG		lg	5			4	Wilkins Peak	carbonate	interior		profundal	mix	C	in		41.5509	-109.418	1 White Mountain	518.5		Wilkins Peak Member		12																		125	7234.32	817.92	0	10.05	332.77	44.88
1384		LG		lg	5			4	Wilkins Peak	carbonate	interior		profundal	mix	C	in		41.5509	-109.418	1 White Mountain	519		Wilkins Peak Member		12																		125	15845.3	1067.32	0	5.74	277.37	35.07
1385		LG		lg	5			4	Wilkins Peak	carbonate	interior		profundal	mix	C	in		41.5509	-109.418	1 White Mountain	519.5		Wilkins Peak Member		12																		125	27984.1	1467.94	0	7.86	372.18	37.24
1386		LG		lg	5			4	Wilkins Peak	carbonate	interior		profundal	mix	C	in		41.5509	-109.418	1 White Mountain	520		Wilkins Peak Member		12																		125	38524.9	1653.2	0	10.51	486.85	40.7
1387		LG		lg	5			4	Wilkins Peak	carbonate	interior		profundal	mix	C	in		41.5509	-109.418	1 White Mountain	520.5		Wilkins Peak Member		12																		125	37199.7	1871.86	0	7.29	420.15	39.39
1388		LG		lg	5			4	Wilkins Peak	carbonate	interior		profundal	mix	C	in		41.5509	-109.418	1 White Mountain	521		Wilkins Peak Member		12																		125	33061.9	1661.33	0	7.89	566.49	38.89
1389		LG		lg	5			1	Wilkins Peak	carbonate	interior		profundal	mix	C	in		41.1138	-109.574	1 Baker Smedly	1087		Wilkins Peak Member		12																		125	11206.7	1249.55	0	8.02	384.17	45.81
1390		LG		lg	5			1	Wilkins Peak	carbonate	interior		profundal	mix	C	in		41.1138	-109.574	1 Baker Smedly	1087.5		Wilkins Peak Member		11																		125	3256.3	896.97	0	7.02	259.78	52.77
1391		LG		lg	5		G	1	Wilkins Peak	mudstone	interior		overbank	mix	C	in		41.1138	-109.574	1 Baker Smedly	1005		Wilkins Peak Member		18																		125	37844.5	1925.92	0	13.21	1537.75	63
1392		LG		lg	5		G	1	Wilkins Peak	mudstone	interior		overbank	mix	C	in		41.1138	-109.574	1 Baker Smedly	1006		Wilkins Peak Member		18																		125	35849.2	1236.3	0	8.09	394.96	46.19
1393		LG		lg	5		G	1	Wilkins Peak	mudstone	interior		overbank	mix	C	in		41.1138	-109.574	1 Baker Smedly	1006.5		Wilkins Peak Member		18																		125	23678.2	1134.3	0	10.65	445.47	59.63
1394		LG		lg	5		G	1	Wilkins Peak	mudstone	interior		overbank	mix	C	in		41.1138	-109.574	1 Baker Smedly	1007		Wilkins Peak Member		19																		125	5398.82	1986.77	0	22.32	676.74	139.32
1395		LG		lg	5		G	1	Wilkins Peak	mudstone	interior		overbank	mix	C	in		41.1138	-109.574	1 Baker Smedly	1007.5		Wilkins Peak Member		19																		125	32025.6	2080.49	0	11.93	427.65	43.22
1396		LG		lg	5		G	1	Wilkins Peak	mudstone	interior		overbank	mix	C	in		41.1138	-109.574	1 Baker Smedly	1008		Wilkins Peak Member		19																		125	25509.4	1304.55	0	9.54	692.52	51.71
1397		LG		lg	5		G	1	Wilkins Peak	mudstone	interior		overbank	mix	C	in		41.1138	-109.574	1 Baker Smedly	1008.5		Wilkins Peak Member		19																		125	28876.6	1844.85	25.08	6.35	535.83	48.77
1398		LG		lg	5		G	1	Wilkins Peak	mudstone	interior		overbank	mix	C	in		41.1138	-109.574	1 Baker Smedly	1009		Wilkins Peak Member		19																		125	34919.6	1136.36	17.05	6.02	419.22	46.97
1399		LG		lg	5		G	1	Wilkins Peak	mudstone	interior		overbank	mix	C	in		41.1138	-109.574	1 Baker Smedly	1009.5		Wilkins Peak Member		19																		125	52288.8	1878.14	20.52	6.64	864.2	51.21
1400		LG		lg	5		G	1	Wilkins Peak	mudstone	interior		overbank	mix	C	in		41.1138	-109.574	1 Baker Smedly	1010		Wilkins Peak Member		19																		125	39875.7	1928.31	12.09	7.11	674.91	48.65
1401		LG		lg	5		G	1	Wilkins Peak	mudstone	interior		overbank	mix	C	in		41.1138	-109.574	1 Baker Smedly	1010.5		Wilkins Peak Member		19																		125	47350.9	2001.59	9.92	6.2	434.72	44.7
1402		LG		lg	5		G	1	Wilkins Peak	mudstone	interior		overbank	mix	C	in		41.1138	-109.574	1 Baker Smedly	1011		Wilkins Peak Member		19																		125	28930.4	1946.72	16.86	6.05	445.49	47.28
1403		LG		lg	5		G	1	Wilkins Peak	mudstone	interior		overbank	mix	C	in		41.1138	-109.574	1 Baker Smedly	1011.5		Wilkins Peak Member		19																		125	23026.5	1752.4	9.62	5.48	410.39	52.55
1404		LG		lg	5		G	1	Wilkins Peak	mudstone	interior		overbank	mix	C	in		41.1138	-109.574	1 Baker Smedly	1012		Wilkins Peak Member		19																		125	54517.2	2346.6	11.29	5.58	624.62	42.82
1405		LG		lg	5		G	1	Wilkins Peak	mudstone	interior		overbank	mix	C	in		41.1138	-109.574	1 Baker Smedly	1012.5		Wilkins Peak Member		19																		125	28847	2186.86	12.42	6.37	522.55	40.57
1406		LG		lg	5		G	1	Wilkins Peak	mudstone	interior		overbank	mix	C	in		41.1138	-109.574	1 Baker Smedly	1013		Wilkins Peak Member		19																		125	21657.5	1838.57	0	8.97	585.74	49.97
1407		LG		lg	5		G	1	Wilkins Peak	mudstone	interior		overbank	mix	C	in		41.1138	-109.574	1 Baker Smedly	1013.5		Wilkins Peak Member		19																		125	17908.7	1261.04	16.77	7.5	491.11	57.68
1408		LG		lg	3.5	vf	G	1	Wilkins Peak	sandstone	interior		fluvial	mix	C	in		41.1138	-109.574	1 Baker Smedly	1014		Wilkins Peak Member		20																		125	34229.2	1488.72	25.63	6.56	534.2	43.08
1409		LG		lg	5		G	1	Wilkins Peak	mudstone	interior		overbank	mix	C	in		41.1138	-109.574	1 Baker Smedly	1014.5		Wilkins Peak Member		18																		125	21805.2	957.8	0	12.14	576.01	55.81
1410		LG		lg	3.5	vf	G	1	Wilkins Peak	sandstone	interior		fluvial	mix	C	in		41.1138	-109.574	1 Baker Smedly	1015		Wilkins Peak Member		20																		125	52936.6	1468.84	0	8.71	1882.69	52.82
1411		LG		lg	3.5	vf	G	1	Wilkins Peak	sandstone	interior		fluvial	mix	C	in		41.1138	-109.574	1 Baker Smedly	1015.5		Wilkins Peak Member		20																		125	33629	1130.2	0	9.98	508.07	48.4
1412		LG		lg	5		G	1	Wilkins Peak	mudstone	interior		overbank	mix	C	in		41.1138	-109.574	1 Baker Smedly	1016		Wilkins Peak Member		19																		125	33372.4	1263.64	11.5	6.69	506.73	47.51
1413		LG		lg	5		G	1	Wilkins Peak	mudstone	interior		overbank	mix	C	in		41.1138	-109.574	1 Baker Smedly	1016.5		Wilkins Peak Member		19																		125	22979	1472.52	11.07	6.92	627.83	60.72
1414		LG		lg	5		G	1	Wilkins Peak	mudstone	interior		overbank	mix	C	in		41.1138	-109.574	1 Baker Smedly	1017		Wilkins Peak Member		19																		125	10303.9	1130	0	12.16	607.62	78.33
1415		LG		lg	5		G	1	Wilkins Peak	mudstone	interior		overbank	mix	C	in		41.1138	-109.574	1 Baker Smedly	1017.5		Wilkins Peak Member		19																		125	40779.6	2008.26	0	7.4	588.37	48.54
1416		LG		lg	5		G	1	Wilkins Peak	mudstone	interior		overbank	mix	C	in		41.1138	-109.574	1 Baker Smedly	1018		Wilkins Peak Member		18																		125	12011.2	1166.2	0	16.13	852.9	86.23
1417		LG		lg	5		G	1	Wilkins Peak	mudstone	interior		overbank	mix	C	in		41.1138	-109.574	1 Baker Smedly	1018.5		Wilkins Peak Member		18																		125	20488.5	1014.4	0	13.94	482.25	60.75
1418		LG		lg	5		G	1	Wilkins Peak	mudstone	interior		overbank	mix	C	in		41.1138	-109.574	1 Baker Smedly	1019		Wilkins Peak Member		18																		125	30569.6	1139.89	9.56	5.95	500.5	48.49
1419		LG		lg	5		G	1	Wilkins Peak	mudstone	interior		overbank	mix	C	in		41.1138	-109.574	1 Baker Smedly	1019.5		Wilkins Peak Member		18																		125	38094.6	1245.27	0	13.64	582.44	43.4
1420		LG		lg	5		G	1	Wilkins Peak	mudstone	interior		overbank	mix	C	in		41.1138	-109.574	1 Baker Smedly	1020		Wilkins Peak Member		18																		125	23504.4	1621.1	0	15.85	701.62	62.45
1421		LG		lg	5		G	1	Wilkins Peak	mudstone	interior		overbank	mix	C	in		41.1138	-109.574	1 Baker Smedly	1020.5		Wilkins Peak Member		18																		125	50904.3	2270.16	0	9.9	627.72	41.49
1422		LG		lg	5		G	1	Wilkins Peak	mudstone	interior		overbank	mix	C	in		41.1138	-109.574	1 Baker Smedly	1021		Wilkins Peak Member		18																		125	53167.5	2041.37	0	8.89	548.47	47.79
1423		LG		lg	5		G	1	Wilkins Peak	mudstone	interior		overbank	mix	C	in		41.1138	-109.574	1 Baker Smedly	1021.5		Wilkins Peak Member		18																		125	40544.4	1539.4	0	12.99	727.68	61.51
1424		LG		lg	5		G	1	Wilkins Peak	mudstone	interior		overbank	mix	C	in		41.1138	-109.574	1 Baker Smedly	1022		Wilkins Peak Member		18																		125	40893.3	1740.46	0	10.49	616.08	56.03
1425		LG		lg	5		G	1	Wilkins Peak	mudstone	interior		overbank	mix	C	in		41.1138	-109.574	1 Baker Smedly	1022.5		Wilkins Peak Member		18																		125	99073.3	2487.05	0	9.87	457.59	41.09
1426		LG		lg	5		G	1	Wilkins Peak	mudstone	interior		overbank	mix	C	in		41.1138	-109.574	1 Baker Smedly	1023		Wilkins Peak Member		18																		125	27208	1238.78	13.01	7.42	440.92	64.88
1427		LG		lg	5		G	1	Wilkins Peak	mudstone	interior		overbank	mix	C	in		41.1138	-109.574	1 Baker Smedly	1023.5		Wilkins Peak Member		18																		125	39511.8	1659.07	0	8.76	536.45	57.52
1428		LG		lg	5		G	1	Wilkins Peak	mudstone	interior		overbank	mix	C	in		41.1138	-109.574	1 Baker Smedly	1024		Wilkins Peak Member		19																		125	34834.7	1708.21	0	8.48	621.6	51.73
1429		LG		lg	4			1	Wilkins Peak	carbonate	interior		palustrine	mix	C	in		41.1138	-109.574	1 Baker Smedly	1024.5		Wilkins Peak Member		1																		125	17510.2	1460.96	0	9.26	622.6	52.67
1430		LG		lg	4			1	Wilkins Peak	carbonate	interior		palustrine	mix	C	in		41.1138	-109.574	1 Baker Smedly	1025		Wilkins Peak Member		1																		125	13241	1204.88	0	8.65	503.32	50.11
1431		LG		lg	5			1	Wilkins Peak	carbonate	interior		profundal	mix	C	in		41.1138	-109.574	1 Baker Smedly	1025.5		Wilkins Peak Member		13																		125	32372.6	1864.34	0	7.78	531.95	40.67
1432		LG		lg	5			1	Wilkins Peak	carbonate	interior		profundal	mix	C	in		41.1138	-109.574	1 Baker Smedly	1026		Wilkins Peak Member		13																		125	21213.4	1657.72	0	8.32	597	41.87
1433		LG		lg	5		G	1	Wilkins Peak	mudstone	interior		overbank	mix	C	in		41.1138	-109.574	1 Baker Smedly	1026.5		Wilkins Peak Member		18																		125	29702.9	1790.48	13.98	5.54	624.23	46.76
1434		LG		lg	3.5	vf	G	1	Wilkins Peak	sandstone	interior		fluvial	mix	C	in		41.1138	-109.574	1 Baker Smedly	1027		Wilkins Peak Member		20																		125	53754.6	1729.24	0	8.43	691.83	45.5
1435		LG		lg	3.5	vf	G	1	Wilkins Peak	sandstone	interior		fluvial	mix	C	in		41.1138	-109.574	1 Baker Smedly	1027.5		Wilkins Peak Member		20																		125	91790.3	2189.56	0	13.12	642.25	40.4
1436		LG		lg	3.5	vf	G	1	Wilkins Peak	sandstone	interior		fluvial	mix	C	in		41.1138	-109.574	1 Baker Smedly	1028		Wilkins Peak Member		20																		125	22412	1171.32	0	11.52	629.84	64.49
1437		LG		lg	5		G	1	Wilkins Peak	mudstone	interior		overbank	mix	C	in		41.1138	-109.574	1 Baker Smedly	1028.5		Wilkins Peak Member		18																		125	41548.2	1270.19	0	12.03	582.33	47.58
1438		LG		lg	5		G	1	Wilkins Peak	mudstone	interior		overbank	mix	C	in		41.1138	-109.574	1 Baker Smedly	1029		Wilkins Peak Member		18																		125	42157.4	1463.41	9.46	6.09	749.8	54.29
1439		LG		lg	5		G	1	Wilkins Peak	mudstone	interior		overbank	mix	C	in		41.1138	-109.574	1 Baker Smedly	1029.5		Wilkins Peak Member		18																		125	76613.5	2309.35	0	9.42	682.08	41.43
1440		LG		lg	5		G	1	Wilkins Peak	mudstone	interior		overbank	mix	C	in		41.1138	-109.574	1 Baker Smedly	1030		Wilkins Peak Member		18																		125	36158	1374.65	0	9.63	784.49	68.78
1441		LG		lg	5		G	1	Wilkins Peak	mudstone	interior		overbank	mix	C	in		41.1138	-109.574	1 Baker Smedly	1030.5		Wilkins Peak Member		18																		125	55254	1538.37	0	8.54	569.01	46.43
1442		LG		lg	3.5	vf	G	1	Wilkins Peak	sandstone	interior		fluvial	mix	C	in		41.1138	-109.574	1 Baker Smedly	1031		Wilkins Peak Member		20																		125	43645.2	1475.88	0	10.66	769.58	51.69
1443		LG		lg	5		G	1	Wilkins Peak	mudstone	interior		overbank	mix	C	in		41.1138	-109.574	1 Baker Smedly	1031.5		Wilkins Peak Member		18																		125	30767.8	1429.95	0	16.85	706.43	70.21
1444		LG		lg	3.5	vf	G	1	Wilkins Peak	sandstone	interior		fluvial	mix	C	in		41.1138	-109.574	1 Baker Smedly	1032		Wilkins Peak Member		20																		125	43212.8	1391.33	0	8.57	815.33	51.2
1445		LG		lg	5		G	1	Wilkins Peak	mudstone	interior		overbank	mix	C	in		41.1138	-109.574	1 Baker Smedly	1032.5		Wilkins Peak Member		18																		125	123502	2830.64	0	7.91	577.52	48.54
1446		LG		lg	5		G	1	Wilkins Peak	mudstone	interior		overbank	mix	C	in		41.1138	-109.574	1 Baker Smedly	1033		Wilkins Peak Member		18																		125	110028	2551.54	201.19	11.19	501.07	40.62
1447		LG		lg	5		G	1	Wilkins Peak	mudstone	interior		overbank	mix	C	in		41.1138	-109.574	1 Baker Smedly	1033.5		Wilkins Peak Member		18																		125	50305.1	1698.35	0	11.41	963.52	47.18
1448		LG		lg	5		G	1	Wilkins Peak	mudstone	interior		overbank	mix	C	in		41.1138	-109.574	1 Baker Smedly	1034		Wilkins Peak Member		18																		125	99773.8	2148.27	12.29	6.15	529.12	40.87
1449		LG		lg	5		G	1	Wilkins Peak	mudstone	interior		overbank	mix	C	in		41.1138	-109.574	1 Baker Smedly	1034.5		Wilkins Peak Member		18																		125	114095	2448.01	0	11	510.7	39.65
1450		LG		lg	5		G	1	Wilkins Peak	mudstone	interior		overbank	mix	C	in		41.1138	-109.574	1 Baker Smedly	1035		Wilkins Peak Member		18																		125	32538.4	1222.83	0	8.58	499.34	47.97
1451		LG		lg	5		G	1	Wilkins Peak	mudstone	interior		overbank	mix	C	in		41.1138	-109.574	1 Baker Smedly	1035.5		Wilkins Peak Member		18																		125	47497.9	1411.4	0	8.84	414.79	36.03
1452		LG		lg	5		G	1	Wilkins Peak	mudstone	interior		overbank	mix	C	in		41.1138	-109.574	1 Baker Smedly	1036		Wilkins Peak Member		18																		125	25504.2	1065.74	0	10.16	392.35	38.84
1453		LG		lg	5		G	1	Wilkins Peak	mudstone	interior		overbank	mix	C	in		41.1138	-109.574	1 Baker Smedly	1036.5		Wilkins Peak Member		18																		125	45924	1464.12	8.64	5.37	446.26	36.98
1454		LG		lg	5		G	1	Wilkins Peak	mudstone	interior		overbank	mix	C	in		41.1138	-109.574	1 Baker Smedly	1037		Wilkins Peak Member		18																		125	68154.8	2201.7	0	11.99	476.18	37.91
1455		LG		lg	5		G	1	Wilkins Peak	mudstone	interior		overbank	mix	C	in		41.1138	-109.574	1 Baker Smedly	1037.5		Wilkins Peak Member		18																		125	9213.5	731.64	18.35	5.83	384.81	45.77
1456		LG		lg	5		F	1	Wilkins Peak	mudstone	interior		overbank	mix	C	in		41.1138	-109.574	1 Baker Smedly	1102		Wilkins Peak Member		18																		125	17821.5	1137.15	0	10.77	538.99	52.92
1457		LG		lg	5		F	1	Wilkins Peak	mudstone	interior		overbank	mix	C	in		41.1138	-109.574	1 Baker Smedly	1103.5		Wilkins Peak Member		18																		125	26405.3	1418.63	125.6	12.13	430.12	57.72
1458		LG		lg	3.5	vf	F	1	Wilkins Peak	sandstone	interior		fluvial	mix	C	in		41.1138	-109.574	1 Baker Smedly	1105		Wilkins Peak Member		20																		125	73261.6	1864.49	80.04	8.6	772.1	41.55
1459		LG		lg	5		F	1	Wilkins Peak	mudstone	interior		overbank	mix	C	in		41.1138	-109.574	1 Baker Smedly	1106.5		Wilkins Peak Member		18																		125	5083.19	1137.67	0	12.07	424.96	87.68
1460		LG		lg	5		F	1	Wilkins Peak	mudstone	interior		overbank	mix	C	in		41.1138	-109.574	1 Baker Smedly	1108		Wilkins Peak Member		18																		125	24910.5	2043.87	0	11.8	741.83	42.06
1461		LG		lg	5		F	1	Wilkins Peak	mudstone	interior		overbank	mix	C	in		41.1138	-109.574	1 Baker Smedly	1109.5		Wilkins Peak Member		18																		125	18878	1495.59	0	7.41	626.56	47.4
1462		LG		lg	3.5	vf	F	1	Wilkins Peak	sandstone	interior		fluvial	mix	C	in		41.1138	-109.574	1 Baker Smedly	1111		Wilkins Peak Member		20																		125	63223.3	1630.95	0	6.78	664.22	39.55
1463		LG		lg	5		F	1	Wilkins Peak	mudstone	interior		overbank	mix	C	in		41.1138	-109.574	1 Baker Smedly	1112.5		Wilkins Peak Member		18																		125	16898.2	1248.24	0	11.04	639.18	53.92
1464		LG		lg	5		F	1	Wilkins Peak	mudstone	interior		overbank	mix	C	in		41.1138	-109.574	1 Baker Smedly	1114		Wilkins Peak Member		18																		125	43554.3	1302.38	0	8.04	531.11	43.04
1465		LG		lg	5		F	1	Wilkins Peak	mudstone	interior		overbank	mix	C	in		41.1138	-109.574	1 Baker Smedly	1115.5		Wilkins Peak Member		18																		125	52403.9	1453.79	0	8.39	737.89	47.02
1466		LG		lg	2.5	f	F	1	Wilkins Peak	sandstone	interior		fluvial	mix	C	in		41.1138	-109.574	1 Baker Smedly	1117		Wilkins Peak Member		17																		125	45862.2	1274.77	0	7.75	568.42	41.64
1467		LG		lg	2.5	f	F	1	Wilkins Peak	sandstone	interior		fluvial	mix	C	in		41.1138	-109.574	1 Baker Smedly	1118.5		Wilkins Peak Member		17																		125	49810.1	1383.14	0	8.33	453.44	35.54
1468		LG		lg	5		F	1	Wilkins Peak	mudstone	interior		overbank	mix	C	in		41.1138	-109.574	1 Baker Smedly	1120		Wilkins Peak Member		18																		125	39351.1	1978.37	0	9.93	628.26	40.49
1469		LG		lg	5		F	1	Wilkins Peak	mudstone	interior		overbank	mix	C	in		41.1138	-109.574	1 Baker Smedly	1121.5		Wilkins Peak Member		18																		125	48005.4	1751.69	0	8.2	517.66	45.7
1470		LG		lg	5		F	1	Wilkins Peak	mudstone	interior		overbank	mix	C	in		41.1138	-109.574	1 Baker Smedly	1123		Wilkins Peak Member		18																		125	44903.8	1355.52	0	12.04	233.51	35.65
1471		LG		lg	5		F	1	Wilkins Peak	mudstone	interior		overbank	mix	C	in		41.1138	-109.574	1 Baker Smedly	1124.5		Wilkins Peak Member		18																		125	49935.2	2097.2	0	9.7	504.31	39.23
1472		LG		lg	3.5	vf	E	1	Wilkins Peak	sandstone	interior		fluvial	mix	C	in		41.1138	-109.574	1 Baker Smedly	1196		Wilkins Peak Member		20																		125	37993.5	1504.83	26.75	7.39	700.99	52.19
1473		LG		lg	3.5	vf	E	1	Wilkins Peak	sandstone	interior		fluvial	mix	C	in		41.1138	-109.574	1 Baker Smedly	1196.5		Wilkins Peak Member		20																		125	20091	1733.95	0	7.72	578.25	47.4
1474		LG		lg	3.5	vf	E	1	Wilkins Peak	sandstone	interior		fluvial	mix	C	in		41.1138	-109.574	1 Baker Smedly	1199		Wilkins Peak Member		20																		125	45641.5	1382.29	22.52	7.34	705.68	44.51
1475		LG		lg	3.5	vf	E	1	Wilkins Peak	sandstone	interior		fluvial	mix	C	in		41.1138	-109.574	1 Baker Smedly	1200.5		Wilkins Peak Member		20																		125	20570.8	1508.38	0	7.12	388.05	43.87
1476		LG		lg	3.5	vf	E	1	Wilkins Peak	sandstone	interior		fluvial	mix	C	in		41.1138	-109.574	1 Baker Smedly	1205.5		Wilkins Peak Member		20																		125	46415.7	1487.43	0	10.46	677.64	50.06
1477		LG		lg	3.5	vf	E	1	Wilkins Peak	sandstone	interior		fluvial	mix	C	in		41.1138	-109.574	1 Baker Smedly	1206.5		Wilkins Peak Member		20																		125	54200.6	1519.36	0	9.92	1279.94	45.68
1478		LG		lg	5		E	1	Wilkins Peak	mudstone	interior		overbank	mix	C	in		41.1138	-109.574	1 Baker Smedly	1211		Wilkins Peak Member		18																		125	13191.4	1524.62	0	9	591.4	51.59
1479		LG		lg	5		D	1	Wilkins Peak	mudstone	interior		overbank	mix	C	in		41.1138	-109.574	1 Baker Smedly	1238		Wilkins Peak Member		18																		125	17877.2	1812.39	10.41	6.25	697.92	45.37
1480		LG		lg	3.5	vf	D	1	Wilkins Peak	sandstone	interior		fluvial	mix	C	in		41.1138	-109.574	1 Baker Smedly	1240		Wilkins Peak Member		20																		125	51921.7	1462.98	0	9.45	873.02	46.51
1481		LG		lg	5		D	1	Wilkins Peak	mudstone	interior		overbank	mix	C	in		41.1138	-109.574	1 Baker Smedly	1242		Wilkins Peak Member		18																		125	64034.6	2392.26	0	8.87	574.3	39.03
1482		LG		lg	5		D	1	Wilkins Peak	mudstone	interior		overbank	mix	C	in		41.1138	-109.574	1 Baker Smedly	1246		Wilkins Peak Member		18																		125	39791.9	1768.7	0	7.16	552.39	45.73
1483		LG		lg	5		D	1	Wilkins Peak	mudstone	interior		overbank	mix	C	in		41.1138	-109.574	1 Baker Smedly	1249		Wilkins Peak Member		18																		125	30579.5	1702.09	0	7.41	477.93	43.33
1484		LG		lg	5		D	1	Wilkins Peak	mudstone	interior		overbank	mix	C	in		41.1138	-109.574	1 Baker Smedly	1254.5		Wilkins Peak Member		18																		125	27549.5	1308.12	0	11.31	790.6	62.21
1485		LG		lg	3.5	vf	D	1	Wilkins Peak	sandstone	interior		fluvial	mix	C	in		41.1138	-109.574	1 Baker Smedly	1267.5		Wilkins Peak Member		20																		125	27500.7	1316.68	0	7.31	465.43	42.08
1486		LG		lg	3.5	vf	D	1	Wilkins Peak	sandstone	interior		fluvial	mix	C	in		41.1138	-109.574	1 Baker Smedly	1269		Wilkins Peak Member		20																		125	17518.3	1057.4	0	16.6	731.94	67.05
1487		LG		lg	5		D	1	Wilkins Peak	mudstone	interior		overbank	mix	C	in		41.1138	-109.574	1 Baker Smedly	1271.5		Wilkins Peak Member		18																		125	26989.6	1507.7	0	13.98	658.15	43.69
1488		LG		lg	5		D	1	Wilkins Peak	mudstone	interior		overbank	mix	C	in		41.1138	-109.574	1 Baker Smedly	1273		Wilkins Peak Member		18																		125	16225.2	1209.83	0	8	687.54	52.92
1489		LG		lg	5		D	1	Wilkins Peak	mudstone	interior		overbank	mix	C	in		41.1138	-109.574	1 Baker Smedly	1274.5		Wilkins Peak Member		18																		125	6827.31	1061.57	0	13.54	572.17	83.04
1490		LG		lg	5		D	1	Wilkins Peak	mudstone	interior		overbank	mix	C	in		41.1138	-109.574	1 Baker Smedly	1276		Wilkins Peak Member		18																		125	8427.26	1248.75	0	14.69	569.18	97.76
1491		LG		lg	5		D	1	Wilkins Peak	mudstone	interior		overbank	mix	C	in		41.1138	-109.574	1 Baker Smedly	1286		Wilkins Peak Member		18																		125	53124.5	2225.52	0	7.46	623.89	39.24
1492		LG		lg	3.5	vf	D	1	Wilkins Peak	sandstone	interior		fluvial	mix	C	in		41.1138	-109.574	1 Baker Smedly	1292		Wilkins Peak Member		20																		125	57720.8	1569.46	0	9.57	722.66	45.44
1493		LG		lg	5		D	1	Wilkins Peak	mudstone	interior		overbank	mix	C	in		41.1138	-109.574	1 Baker Smedly	1295.5		Wilkins Peak Member		18																		125	47729.4	2001.61	7.71	5.11	471.2	45.65
1494		LG		lg	5		D	1	Wilkins Peak	mudstone	interior		overbank	mix	C	in		41.1138	-109.574	1 Baker Smedly	1301		Wilkins Peak Member		18																		125	43293.2	1567.85	16.27	5.98	506.94	48.08
1495		LG		lg	5		D	1	Wilkins Peak	mudstone	interior		overbank	mix	C	in		41.1138	-109.574	1 Baker Smedly	1304		Wilkins Peak Member		19																		125	14432.8	829.74	0	10.53	978.59	41.25
1496		LG		lg	5		D	1	Wilkins Peak	mudstone	interior		overbank	mix	C	in		41.1138	-109.574	1 Baker Smedly	1306.5		Wilkins Peak Member		19																		125	32543	1391.15	0	6.38	414.95	43.48
1497		LG		lg	5		D	1	Wilkins Peak	mudstone	interior		overbank	mix	C	in		41.1138	-109.574	1 Baker Smedly	1308		Wilkins Peak Member		18																		125	20209.1	1289.22	0	7.58	420.32	43.15
1498		LG		lg	5		D	1	Wilkins Peak	mudstone	interior		overbank	mix	C	in		41.1138	-109.574	1 Baker Smedly	1310		Wilkins Peak Member		18																		125	24398.9	1496.37	0	6.1	389.71	36.94
1499		LG		lg	5		C	1	Wilkins Peak	mudstone	interior		overbank	mix	C	in		41.1138	-109.574	1 Baker Smedly	1377		Wilkins Peak Member		18																		125	13374.2	1232.67	14.12	7.32	418.61	59.83
1500		LG		lg	5		C	1	Wilkins Peak	mudstone	interior		overbank	mix	C	in		41.1138	-109.574	1 Baker Smedly	1378		Wilkins Peak Member		18																		125	24531.6	1278.08	13.59	5.84	901.15	51.57
1501		LG		lg	5		C	1	Wilkins Peak	mudstone	interior		overbank	mix	C	in		41.1138	-109.574	1 Baker Smedly	1379		Wilkins Peak Member		18																		125	19195.1	1319.57	0	11.67	391.92	63.21
1502		LG		lg	5		E	1	Wilkins Peak	mudstone	interior		overbank	mix	C	in		41.1138	-109.574	1 Baker Smedly	1166		Wilkins Peak Member																				125	14508.2	1477.87	0	8.29	559.64	55.18
1503		LG		lg	5		E	1	Wilkins Peak	mudstone	interior		overbank	mix	C	in		41.1138	-109.574	1 Baker Smedly	1177.5		Wilkins Peak Member																				125	12506.7	1720.81	0	6.92	581.05	50.86
1504		LG		lg	5		E	1	Wilkins Peak	mudstone	interior		overbank	mix	C	in		41.1138	-109.574	1 Baker Smedly	1181		Wilkins Peak Member																				125	48829.2	1656.72	0	14.77	797.68	52.03
1505		LG		lg	5		E	1	Wilkins Peak	mudstone	interior		overbank	mix	C	in		41.1138	-109.574	1 Baker Smedly	1182		Wilkins Peak Member																				125	21143.9	2009.2	0	10.82	544.04	40.88
1506		LG		lg	5		B	1	Wilkins Peak	mudstone	interior		overbank	mix	C	in		41.1138	-109.574	1 Baker Smedly	1452		Wilkins Peak Member		18																		125	43219.3	1352.07	0	9.99	742.51	50.89
1507	1A-156Q-1	HG	HG	cam	3.25	vfu	I	28	Wilkins Peak	sandstone	interior	top	fluvial	mix	C	in		41.4142	-109.697	Solvay	377.59	m	Wilkins Peak Member							0.809524	0.047619	0.142857	0	0	0.49505	0.217822	0	0.0247525	0.0049505	0	0.0346535	0	600	34843	1395	9	3	518	36
1508	1A-156Q-5	HG		cam	2.75	fl	I	28	Wilkins Peak	sandstone	interior	top	fluvial	mix	C	in		41.4142	-109.697	Solvay	379.865	m	Wilkins Peak Member																				600	9363	837	14	5	440	58
1509	1A-159Q-3	HG		cam	2.75	fl	I	28	Wilkins Peak	sandstone	interior	top	fluvial	mix	C	in		41.4142	-109.697	Solvay	387.52	m	Wilkins Peak Member																				600	10913	932	32	5	266	59
1510	1A-159Q-4	HG		cam	1.75	ml	I	28	Wilkins Peak	sandstone	interior	top	fluvial	mix	C	in		41.4142	-109.697	Solvay	387.87	m	Wilkins Peak Member																				600	13581	851	71	5	158	37
1511	1A-167Q-1	HG		cam	5	vfl	H	28	Wilkins Peak	mudstone	interior	top	overbank	mix	C	in		41.4142	-109.697	Solvay	410.68	m	Wilkins Peak Member																				600	25040	1502	10	4	327	38
1512	1A-167Q-4	HG		cam	5	vfl	H	28	Wilkins Peak	mudstone	interior	top	overbank	mix	C	in		41.4142	-109.697	Solvay	412.59	m	Wilkins Peak Member																				600	52666	1743	8	4	325	42
1513	1A-167Q-6	HG		cam	5	vfl	H	28	Wilkins Peak	mudstone	interior	top	overbank	mix	C	in		41.4142	-109.697	Solvay	413.53	m	Wilkins Peak Member																				600	50377	1953	13	4	445	37
1514	1A-168Q-5	HG		cam	5	vfl	H	28	Wilkins Peak	mudstone	interior	top	overbank	mix	C	in		41.4142	-109.697	Solvay	416.13	m	Wilkins Peak Member																				600	38165	1790	0		300	36
1515	1A-174Q-1	HG		cam	5	vfl	G	28	Wilkins Peak	mudstone	interior	bottom	overbank	mix	C	in		41.4142	-109.697	Solvay	432.12	m	Wilkins Peak Member																				450	20824	1049	13	3	436	38
1516	1A-175Q-4	HG		cam	5	vfl	G	28	Wilkins Peak	mudstone	interior	bottom	overbank	mix	C	in		41.4142	-109.697	Solvay	436.66	m	Wilkins Peak Member																				600	80272	2190	0		282	35
1517	1A-182Q-2	HG		cam	3.25	vfu	F	28	Wilkins Peak	sandstone	interior	bottom	fluvial	mix	C	in		41.4142	-109.697	Solvay	457.115	m	Wilkins Peak Member																				600	39969	1538	0		367	50
1518	1A-188Q-2	HG		cam	5	vfl	E	28	Wilkins Peak	mudstone	interior	bottom	overbank	mix	C	in		41.4142	-109.697	Solvay	471.69	m	Wilkins Peak Member																				600	46872	2270	0		543	44
1519	1A-188Q-2	HG		cam	2.75	fl	E	28	Wilkins Peak	sandstone	interior	bottom	littoral	mix	C	in		41.4142	-109.697	Solvay	472.225	m	Wilkins Peak Member																				600	20541	1632	0		476	44
1520	1A-189Q-4	HG		cam	5	vfl	E	28	Wilkins Peak	mudstone	interior	bottom	overbank	mix	C	in		41.4142	-109.697	Solvay	476.515	m	Wilkins Peak Member																				600	50041	1730	0		299	52
1521	1A-193Q-1	HG	HG	cam	3.25	vfu	E	28	Wilkins Peak	sandstone	interior	bottom	fluvial	mix	C	in		41.4142	-109.697	Solvay	476.59	m	Wilkins Peak Member							0.628571	0.12381	0.247619	0	0.0761905	0.41791	0.159204	0.0149254	0.0497512	0.109453	0	0	0	600	30667	1490	0		591	78
1522	1A-196Q-5	HG	HG	cam	3.25	vfu	D	28	Wilkins Peak	sandstone	interior	bottom	fluvial	mix	C	in		41.4142	-109.697	Solvay	487.08	m	Wilkins Peak Member							0.727273	0	0.272727	0	0	0.0544554	0.272277	0	0	0.0495049	0	0		600	40807	1650	0		350	61
1523	1A-197Q-2	HG	HG	cam	3.25	vfu	D	28	Wilkins Peak	sandstone	interior	bottom	fluvial	mix	C	in		41.4142	-109.697	Solvay	498.505	m	Wilkins Peak Member							0.875	0	0.125	0	0	0.0784314	0.0588235	0	0	0.0147059	0	0		600	51358	1590	11	4	373	48
1524	1A-197Q-2	HG		cam	5		D	28	Wilkins Peak	mudstone	interior	bottom	overbank	mix	C	in		41.4142	-109.697	Solvay	499.85	m	Wilkins Peak Member																				600	108714	2515	18	4	563	39
1525	1A-198Q-2	HG		cam	5	vfl	D	28	Wilkins Peak	mudstone	interior	bottom	overbank	mix	C	in		41.4142	-109.697	Solvay	502.905	m	Wilkins Peak Member																				600	32036	1703	0		309	54
1526	1A-198Q-5	HG		cam	2.75	fl	C	28	Wilkins Peak	sandstone	interior	bottom	littoral	mix	C	in		41.4142	-109.697	Solvay	504.575	m	Wilkins Peak Member																				600	11638	1243	0		581	40
1527	1A-201Q-5	HG		cam	5	vfl	C	28	Wilkins Peak	mudstone	interior	bottom	overbank	mix	C	in		41.4142	-109.697	Solvay	513.41	m	Wilkins Peak Member																				600	84295	2382	22	4	409	39
1528	1A-208Q-3	HG	HG	cam	3.25	vfu	B	28	Wilkins Peak	sandstone	interior	bottom	fluvial	mix	C	in		41.4142	-109.697	Solvay	533.945	m	Wilkins Peak Member							0.443038	0.303797	0.253165	0	0	0.268293	0.097561	0.00487805	0.112195	0.141463	0.00487805	0.0292683	0	600	22936	1202	10	6	469	64
1529	1A-208Q-4	HG		cam	5	vfl	B	28	Wilkins Peak	mudstone	interior	bottom	overbank	mix	C	in		41.4142	-109.697	Solvay	534.655	m	Wilkins Peak Member																				600	34618	1809	0		700	62
1530	1A-208Q-5	HG	HG	cam	2.75	fl	B	28	Wilkins Peak	sandstone	interior	bottom	fluvial	mix	C	in		41.4142	-109.697	Solvay	535.45	m	Wilkins Peak Member							0.634921	0.277778	0.0873016	0	0	0.4375	0.0144231	0.0913462	0.0769231	0.211538	0.0480769	0.0288462	0	600	68193	1783	6	4	3569	59
1531	1A-214Q-3	HG		cam	3.25	vfu	A	28	Wilkins Peak	sandstone	interior	bottom	fluvial	mix	C	in		41.4142	-109.697	Solvay	552.16	m	Wilkins Peak Member																				600	61208	1687	0		333	49
1532	1A-214Q-4	HG	HG	cam	3.25	vfu	A	28	Wilkins Peak	sandstone	interior	bottom	fluvial	mix	C	in		41.4142	-109.697	Solvay	552.755	m	Wilkins Peak Member							0.219298	0.701754	0.0789474	0	0	0.158879	0	0.341121	0.0327103	0.0841121	0	0.154206	0	600	72506	1444	10	3	416	30
1533	20-158-DH	HG		HGG	3.25	vfu	I	5	Wilkins Peak	sandstone	interior		fluvial	mix	C	in		41.1771	-109.347	Big Ridge			Wilkins Peak Member																				450	87675	1827	8	5	419	40
1534	20-159-DH	HG		HGG	2.75	fl	I	5	Wilkins Peak	sandstone	interior		fluvial	mix	C	in		41.1771	-109.347	Big Ridge			Wilkins Peak Member																				450	62895	1445	63	5	546	40
1535	20-090-CS	HG		HGG	3.25	vfu	I	6	Wilkins Peak	sandstone	interior		fluvial	mix	C	in		41.4226	-109.442	Chicken Springs			Wilkins Peak Member																				450	59304	1914	0		427	39
1536	20-092-CS	HG		HGG	5	vfl	H	6	Wilkins Peak	mudstone	interior		overbank	mix	C	in		41.4214	-109.44	Chicken Springs			Wilkins Peak Member																				450	34860	1572	7	3	424	38
1537	20-173-CC	HG		HGG	5	vfl	A	8	Wilkins Peak	mudstone	interior		overbank	mix	C	in		41.215	-109.349	Currant Creek			Wilkins Peak Member																				450	49548	1710	9	4	490	42
1538	20-174-cc	HG	MES	fs	2.75	fl	A	8	Wilkins Peak	sandstone	interior		fluvial	mix	C	in		41.2151	-109.349	Currant Creek			Wilkins Peak Member							0.511873	0.488127	0	0	0	0.434004	0	0.149888	0.263982	0.0917226	0	0.0201342	0	450	49603	1210	0		384	34
1539	20-175-cc	HG		fs	5	vfl	B	8	Wilkins Peak	mudstone	interior		overbank	mix	C	in		41.2152	-109.351	Currant Creek			Wilkins Peak Member																				450	45383	1591	10	4	554	40
1540	20-176-cc	HG		fs	2.75	fl	B	8	Wilkins Peak	sandstone	interior		fluvial	mix	C	in		41.2152	-109.351	Currant Creek			Wilkins Peak Member																				450	55146	1327	9	4	1029	39
1541	20-177-cc	HG		fs	5	vfl	C	8	Wilkins Peak	mudstone	interior		overbank	mix	C	in		41.2159	-109.356	Currant Creek			Wilkins Peak Member																				450	66056	1576	0		500	38
1542	20-178-cc	HG		fs	2.75	fl	C	8	Wilkins Peak	sandstone	interior		littoral	mix	C	in		41.2159	-109.356	Currant Creek			Wilkins Peak Member																				450	22080	1519	24	5	926	46
1543	20-179-cc	HG		fs	5	vfl	D	8	Wilkins Peak	mudstone	interior		overbank	mix	C	in		41.2166	-109.365	Currant Creek			Wilkins Peak Member																				450	56030	1437	0		518	37
1544	20-180-cc	HG	MES	fs	2.75	fl	D	8	Wilkins Peak	sandstone	interior		fluvial	mix	C	in		41.2166	-109.365	Currant Creek			Wilkins Peak Member							0.520833	0.462963	0.0162037	0	0.0162037	0.462963	0.00205761	0.152263	0.259259	0.0473251	0.037037	0	0.0205761	450	38370	1072	0		354	33
1545	20-181-CC	HG		HGG	3.25	vfu	E	8	Wilkins Peak	sandstone	interior		fluvial	mix	C	in		41.217	-109.369	Currant Creek			Wilkins Peak Member																				450	63504	1694	0		3406	67
1546	20-182-CC	HG		HGG	5	vfl	F	8	Wilkins Peak	mudstone	interior		overbank	mix	C	in		41.2169	-109.371	Currant Creek			Wilkins Peak Member																				450	88519	1847	11	4	450	41
1547	20-183-CC	HG		HGG	3.75	vfl	F	8	Wilkins Peak	sandstone	interior		fluvial	mix	C	in		41.2169	-109.371	Currant Creek			Wilkins Peak Member																				450	66875	1960	6	4	495	40
1548	20-184-CC	HG		HGG	5	vfl	G	8	Wilkins Peak	mudstone	interior		overbank	mix	C	in		41.2166	-109.384	Currant Creek			Wilkins Peak Member																				450	84214	1898	13	4	545	42
1549	20-185-CC	HG	MES	HGG	3.25	vfu	G	8	Wilkins Peak	sandstone	interior		fluvial	mix	C	in		41.2166	-109.384	Currant Creek			Wilkins Peak Member							0.483333	0.47619	0.0404762	0	0.0214286	0.454741	0	0.0775862	0.353448	0.0668103	0.00862069	0.00646552	0.00646552	450	37693	1371	17	4	531	36
1550	20-186-CC	HG		HGG	5	vfl	H	8	Wilkins Peak	mudstone	interior		overbank	mix	C	in		41.2174	-109.385	Currant Creek			Wilkins Peak Member																				450	88725	1882	10	4	415	42
1551	20-187-CC	HG	MES	HGG	2.75	fl	H	8	Wilkins Peak	sandstone	interior		fluvial	mix	C	in		41.2174	-109.385	Currant Creek			Wilkins Peak Member							0.423469	0.522959	0.0535714	0	0.0255102	0.425481	0	0.144231	0.348558	0.0264423	0.00961539	0.00961539	0.163462	450	34592	1543	28	4	420	42
1552	20-188-CC	HG		HGG	2.75	fl	I	8	Wilkins Peak	sandstone	interior		fluvial	mix	C	in		41.218	-109.386	Currant Creek			Wilkins Peak Member																				450	55525	1287	0		390	33
1553	20-141-RC3	HG		HGG	5	vfl	I	9	Wilkins Peak	mudstone	interior		overbank	mix	C	in		41.0727	-109.472	Deer Mound			Wilkins Peak Member																				450	86892	1750	10	5	456	40
1554	20-004-FC	HG		HGG	3.25	vfu	A	10	Wilkins Peak	sandstone	interior		fluvial	mix	C	in		41.3491	-109.378	Firehole Canyon			Wilkins Peak Member																				450	59492	1625	16	4	1095	46
1555	20-006-FC	HG		HGG	2.25	fu	A	10	Wilkins Peak	sandstone	interior		fluvial	mix	C	in		41.3503	-109.376	Firehole Canyon			Wilkins Peak Member																				450	61115	1587	6	4	540	39
1556	20-007-FC	HG		HGG	5	vfl	B	10	Wilkins Peak	mudstone	interior		overbank	mix	C	in		41.3505	-109.378	Firehole Canyon			Wilkins Peak Member																				450	52899	1885	8	4	622	42
1557	20-008-FC	HG	MES	HGG	2.25	fu	B	10	Wilkins Peak	sandstone	interior		fluvial	mix	C	in		41.3501	-109.378	Firehole Canyon			Wilkins Peak Member							0.518201	0.438972	0.0428266	0	0.0235546	0.506048	0	0.102823	0.310484	0.0403226	0.0141129	0	0.00806452	450	62700	1472	0		1390	42
1558	20-009-FC	HG		HGG	3.25	vfu	A	10	Wilkins Peak	sandstone	interior		fluvial	mix	C	in		41.3462	-109.386	Firehole Canyon			Wilkins Peak Member																				450	65730	1698	0		391	38
1559	20-010-FC	HG		HGG	5	vfl	A	10	Wilkins Peak	mudstone	interior		overbank	mix	C	in		41.3461	-109.386	Firehole Canyon			Wilkins Peak Member																				450	50337	1814	0		662	43
1560	20-011-FC	HG		HGG	3.25	vfu	A	10	Wilkins Peak	sandstone	interior		fluvial	mix	C	in		41.3459	-109.386	Firehole Canyon			Wilkins Peak Member																				450	75507	1981	10	4	399	39
1561	20-012-FC	HG		HGG	5	vfl	B	10	Wilkins Peak	mudstone	interior		overbank	mix	C	in		41.3463	-109.384	Firehole Canyon			Wilkins Peak Member																				450	60923	1959	8	4	542	41
1562	20-014-FC	HG		HGG	5	vfl	C	10	Wilkins Peak	mudstone	interior		overbank	mix	C	in		41.3475	-109.382	Firehole Canyon			Wilkins Peak Member																				450	68335	1900	10	4	591	43
1563	20-016-FC	HG		HGG	5	vfl	D	10	Wilkins Peak	mudstone	interior		overbank	mix	C	in		41.3448	-109.387	Firehole Canyon			Wilkins Peak Member																				450	58163	1906	8	4	515	42
1564	20-019-FC	HG	HG	HGG	2.75	fl	E	10	Wilkins Peak	sandstone	interior		fluvial	mix	C	in		41.3444	-109.388	Firehole Canyon			Wilkins Peak Member							0.691781	0.246575	0.0616438	0	0.0547945	0.495146	0.135922	0.121359	0.0533981	0.0728155	0.0485437	0.00485437	0	450	46772	1272	0		402	35
1565	20-021-FC	HG		HGG	3.25	vfu	G	10	Wilkins Peak	sandstone	interior		fluvial	mix	C	in		41.3409	-109.392	Firehole Canyon			Wilkins Peak Member																				450	70806	1695	9	4	1061	46
1566	20-022-FC	HG		HGG	5	vfl	G	10	Wilkins Peak	mudstone	interior		overbank	mix	C	in		41.3409	-109.392	Firehole Canyon			Wilkins Peak Member																				450	65999	2075	0		695	46
1567	20-023-FC	HG		HGG	2.75	fl	G	10	Wilkins Peak	sandstone	interior		fluvial	mix	C	in		41.3409	-109.392	Firehole Canyon			Wilkins Peak Member																				450	24281	1513	14	4	513	45
1568	20-024-FC	HG		HGG	2.75	fl	H	10	Wilkins Peak	sandstone	interior		fluvial	mix	C	in		41.3408	-109.393	Firehole Canyon			Wilkins Peak Member																				450	33040	1357	0		649	40
1569	20-025-FC	HG		HGG	2.75	fl	I	10	Wilkins Peak	sandstone	interior		fluvial	mix	C	in		41.3395	-109.397	Firehole Canyon			Wilkins Peak Member																				450	51502	1487	0		561	39
1570	20-036-FC	HG		HGG	3.25	vfu	F	10	Wilkins Peak	sandstone	interior		fluvial	mix	C	in		41.3481	-109.43	Firehole Canyon			Wilkins Peak Member																				450	53976	1437	0		1354	45
1571	20-037-FC	HG		HGG	5	vfl	F	10	Wilkins Peak	mudstone	interior		overbank	mix	C	in		41.3482	-109.43	Firehole Canyon			Wilkins Peak Member																				450	84666	2041	10	4	575	43
1572	20-038-FC	HG	MES	HGG	2.75	fl	D	10	Wilkins Peak	sandstone	interior		fluvial	mix	C	in		41.3472	-109.43	Firehole Canyon			Wilkins Peak Member							0.581858	0.402655	0.0154867	0	0.0154867	0.526	0	0.078	0.286	0.03	0.04	0.012	0	450	77708	1760	0		533	42
1573	20-039-FC	HG		HGG	2.75	fl	F	10	Wilkins Peak	sandstone	interior		fluvial	mix	C	in		41.3473	-109.431	Firehole Canyon			Wilkins Peak Member																				450	59883	1502	7	4	529	37
1574	20-041-FC	HG		HGG	5	vfl	G	10	Wilkins Peak	mudstone	interior		overbank	mix	C	in		41.3498	-109.429	Firehole Canyon			Wilkins Peak Member																				450	79536	1803	0		524	41
1575	20-160-SAC	HG		HGG	5	vfl	I	14	Wilkins Peak	mudstone	interior		overbank	mix	C	in		41.3311	-109.45	Greasewood Draw N			Wilkins Peak Member																				450	76713	1697	6	3	466	37
1576	20-161-SAC	HG		HGG	2.75	fl	I	14	Wilkins Peak	sandstone	interior		fluvial	mix	C	in		41.3311	-109.45	Greasewood Draw N			Wilkins Peak Member																				450	46439	1189	0		1615	44
1577	20-162-SAC	HG		HGG	5	vfl	I	13	Wilkins Peak	mudstone	interior		overbank	mix	C	in		41.2845	-109.433	Greasewood Draw			Wilkins Peak Member																				450	67829	1625	7	4	568	42
1578	20-163-SAC	HG		HGG	2.75	fl	I	13	Wilkins Peak	sandstone	interior		fluvial	mix	C	in		41.2845	-109.433	Greasewood Draw			Wilkins Peak Member																				450	51901	1288	0		798	39
1579	20-164-SAC	HG		HGG	3.25	vfu	H	13	Wilkins Peak	sandstone	interior		overbank	mix	C	in		41.2825	-109.43	Greasewood Draw			Wilkins Peak Member																				450	45482	1423	0		469	39
1580	20-165-SAC	HG		HGG	2.75	fl	H	13	Wilkins Peak	sandstone	interior		fluvial	mix	C	in		41.2825	-109.43	Greasewood Draw			Wilkins Peak Member																				450	47610	1243	0		564	37
1581	20-166-SAC	HG		HGG	2.75	fl	I	12	Wilkins Peak	sandstone	interior		fluvial	mix	C	in		41.274	-109.439	Greasewood Draw			Wilkins Peak Member																				450	46436	1203	0		325	34
1582	20-133-IM	HG		HGG	2.75	fl	E	17	Wilkins Peak	sandstone	periphery		fluvial	UT	S	out		41.0376	-109.454	Iron Mountain			Wilkins Peak Member																				450	11428	764	0		139	33
1583	20-134-IM	HG		HGG	3.25	vfu	F	17	Wilkins Peak	sandstone	periphery		fluvial	UT	S	out		41.0381	-109.453	Iron Mountain			Wilkins Peak Member																				450	9314	852	0		163	34
1584	20-135-IM	HG		HGG	3.25	vfu	G	17	Wilkins Peak	sandstone	periphery		fluvial	UT	S	out		41.0395	-109.454	Iron Mountain			Wilkins Peak Member																				450	14610	838	0		172	33
1585	20-136-IM	HG		HGG	2.75	fl	H	17	Wilkins Peak	sandstone	periphery		fluvial	mix	C	in		41.0476	-109.451	Iron Mountain			Wilkins Peak Member																				450	23583	1008	0		165	32
1586	20-137-IM	HG		HGG	3.25	vfu	H	17	Wilkins Peak	sandstone	periphery		fluvial	mix	C	in		41.0476	-109.451	Iron Mountain			Wilkins Peak Member																				450	11946	993	0		291	36
1587	20-138-IM	HG		HGG	2.25	fu	H	17	Wilkins Peak	sandstone	periphery		fluvial	mix	C	in		41.0475	-109.45	Iron Mountain			Wilkins Peak Member																				450	18759	941	0		138	33
1588	20-139-IM	HG		HGG	2.75	fl	I	17	Wilkins Peak	sandstone	periphery		fluvial	mix	C	in		41.0475	-109.45	Iron Mountain			Wilkins Peak Member																				450	20234	986	5	3	195	33
1589	20-140-IM	HG		HGG	2.25	fu	I	17	Wilkins Peak	sandstone	periphery		fluvial	mix	C	in		41.0476	-109.45	Iron Mountain			Wilkins Peak Member																				450	11968	805	0		161	33
1590	20-189-RD	HG		HGG	2.75	fl	T	17	Tipton	sandstone	periphery		fluvial	UT	S	out		41.0302	-109.456	Iron Mountain			Tipton Member																				450	15064	1032	0		208	34
1591	20-190-RD	HG		HGG	3.25	vfu	A	17	Wilkins Peak	sandstone	periphery		fluvial	UT	S	out		41.0308	-109.456	Iron Mountain			Wilkins Peak Member																				450	16575	760	0		111	29
1592	20-191-RD	HG	MES	HGG	2.75	fl	B	17	Wilkins Peak	sandstone	periphery		fluvial	UT	S	out		41.0333	-109.458	Iron Mountain			Wilkins Peak Member							0.680942	0.0192719	0.299786	0	0.284797	0.663265	0.044898	0.00408163	0.0142857	0	0	0	0	450	11845	633	0		103	29
1593	20-192-RD	HG		HGG	2.75	fl	D	17	Wilkins Peak	sandstone	periphery		fluvial	UT	S	out		41.0335	-109.458	Iron Mountain			Wilkins Peak Member																				450	21794	936	0		137	31
1594	20-193-RD	HG		HGG	2.25	fu	D	17	Wilkins Peak	sandstone	periphery		fluvial	UT	S	out		41.0338	-109.458	Iron Mountain			Wilkins Peak Member																				450	18310	979	0		159	33
1595	20-194-RD	HG		HGG	2.25	fu	F	17	Wilkins Peak	sandstone	periphery		fluvial	UT	S	out		41.0342	-109.459	Iron Mountain			Wilkins Peak Member																				450	15192	943	0		148	34
1596	20-195-RD	HG		HGG	2.75	fl	G	17	Wilkins Peak	sandstone	periphery		fluvial	UT	S	out		41.0354	-109.46	Iron Mountain			Wilkins Peak Member																				450	10438	805	0		157	32
1597	20-044-KA	HG		HGG	2.75	fl	A	19	Wilkins Peak	sandstone	interior		fluvial	mix	C	in		41.5571	-109.35	Kanda			Wilkins Peak Member																				450	56111	1394	13	4	717	39
1598	20-045-KA	HG		HGG	2.75	fl	B	19	Wilkins Peak	sandstone	interior		fluvial	mix	C	in		41.5579	-109.351	Kanda			Wilkins Peak Member																				450	50126	1326	6	4	683	37
1599	20-046-KA	HG		HGG	3.25	vfu	D	19	Wilkins Peak	sandstone	interior		fluvial	mix	C	in		41.5614	-109.35	Kanda			Wilkins Peak Member																				450	65266	1627	7	3	588	40
1600	20-047-KA	HG		HGG	2.75	fl	D	19	Wilkins Peak	sandstone	interior		fluvial	mix	C	in		41.5615	-109.35	Kanda			Wilkins Peak Member																				450	58397	1534	8	4	735	40
1601	20-048-KA	HG		HGG	3.75	vfl	F	19	Wilkins Peak	sandstone	interior		littoral	mix	C	in		41.5621	-109.35	Kanda			Wilkins Peak Member																				450	9842	1339	0		721	46
1602	20-049-KA	HG		HGG	3.75	vfl	G	19	Wilkins Peak	sandstone	interior		littoral	mix	C	in		41.5625	-109.35	Kanda			Wilkins Peak Member																				450	10241	1454	0		434	48
1603	20-050-KA	HG		HGG	3.75	vfl	H	19	Wilkins Peak	sandstone	interior		fluvial	mix	C	in		41.563	-109.35	Kanda			Wilkins Peak Member																				450	17886	1485	6	4	426	43
1604	20-051-KA	HG		HGG	3.25	vfu	I	19	Wilkins Peak	sandstone	interior		fluvial	mix	C	in		41.5638	-109.351	Kanda			Wilkins Peak Member																				450	56981	1612	9	4	623	41
1605	20-119-RC1	HG	MES	HGG	0.75	cl	B	20	Wilkins Peak	sandstone	periphery		fluvial	UT	C	in		41.07	-109.291	Little Mountain			Wilkins Peak Member							0.949698	0.0221328	0.028169	0	0.028169	0.949698	0	0	0.0221328	0	0	0	0	450	27315	792	0		113	28
1606	20-120-RC1	HG		HGG	2.75	fl	B	20	Wilkins Peak	sandstone	periphery		fluvial	UT	C	in		41.0701	-109.291	Little Mountain			Wilkins Peak Member																				450	50122	1521	0		281	36
1607	20-121-RC1	HG		HGG	1.25	mu	B	20	Wilkins Peak	sandstone	periphery		fluvial	UT	C	in		41.0701	-109.291	Little Mountain			Wilkins Peak Member																				450	21933	706	0		70	29
1608	20-122-RC1	HG		HGG	5	vfl	B	20	Wilkins Peak	mudstone	periphery		overbank	UT	C	in		41.0699	-109.292	Little Mountain			Wilkins Peak Member																				450	57424	1494	0		347	37
1609	20-123-RC1	HG		HGG	1.75	ml	B	20	Wilkins Peak	sandstone	periphery		fluvial	UT	C	in		41.07	-109.292	Little Mountain			Wilkins Peak Member																				450	35750	993	0		132	32
1610	20-124-rc1	HG		fs	3.25	vfu	B	20	Wilkins Peak	sandstone	periphery		fluvial	UT	C	in		41.07	-109.292	Little Mountain			Wilkins Peak Member																				450	49514	1409	0		231	35
1611	20-125-rc2	HG		fs	2.25	fu	B	21	Wilkins Peak	sandstone	periphery		fluvial	UT	C	in		41.0648	-109.319	Little Mountain			Wilkins Peak Member																				450	29749	991	0		188	35
1612	20-126-rc2	HG		fs	3.25	vfu	B	21	Wilkins Peak	sandstone	periphery		fluvial	UT	C	in		41.0648	-109.319	Little Mountain			Wilkins Peak Member																				450	57256	1571	0		322	37
1613	20-127-RC2	HG		HGG	3.25	vfu	B	21	Wilkins Peak	sandstone	periphery		fluvial	UT	C	in		41.0648	-109.319	Little Mountain			Wilkins Peak Member																				450	19462	1023	0		163	34
1614	20-128-RC2	HG		HGG	5	vfl	B	21	Wilkins Peak	mudstone	periphery		overbank	UT	C	in		41.0648	-109.319	Little Mountain			Wilkins Peak Member																				450	51188	1884	0		445	44
1615	20-129-RC2	HG		HGG	2.75	fl	B	21	Wilkins Peak	sandstone	periphery		fluvial	UT	C	in		41.0648	-109.319	Little Mountain			Wilkins Peak Member																				450	16038	867	0		108	32
1616	20-101-SAC	HG		HGG	5	vfl	A	27	Wilkins Peak	mudstone	interior		overbank	mix	C	in		41.2933	-109.387	Sage Creek			Wilkins Peak Member																				450	53511	1346	0		554	36
1617	20-102-SAC	HG		HGG	2.75	fl	A	27	Wilkins Peak	sandstone	interior		fluvial	mix	C	in		41.2933	-109.387	Sage Creek			Wilkins Peak Member																				450	46067	1230	0		423	34
1618	20-103-SAC	HG		HGG	5	vfl	B	27	Wilkins Peak	mudstone	interior		overbank	mix	C	in		41.2935	-109.387	Sage Creek			Wilkins Peak Member																				450	54090	1826	6	4	434	40
1619	20-104-SAC	HG		HGG	2.25	fu	B	27	Wilkins Peak	sandstone	interior		fluvial	mix	C	in		41.2935	-109.387	Sage Creek			Wilkins Peak Member																				450	53441	1473	20	4	645	38
1620	20-105-SAC	HG		HGG	3.25	vfu	C	27	Wilkins Peak	sandstone	interior		fluvial	mix	C	in		41.2923	-109.392	Sage Creek			Wilkins Peak Member																				450	59135	1406	0		526	37
1621	20-106-SAC	HG		HGG	2.75	fl	C	27	Wilkins Peak	sandstone	interior		fluvial	mix	C	in		41.2923	-109.392	Sage Creek			Wilkins Peak Member																				450	44927	1166	0		343	33
1622	20-107-SAC	HG		HGG	3.25	vfu	D	27	Wilkins Peak	sandstone	interior		fluvial	mix	C	in		41.2895	-109.396	Sage Creek			Wilkins Peak Member																				450	70345	1616	12	4	591	39
1623	20-108-SAC	HG		HGG	2.75	fl	D	27	Wilkins Peak	sandstone	interior		fluvial	mix	C	in		41.2895	-109.396	Sage Creek			Wilkins Peak Member																				450	49480	1397	21	5	392	36
1624	20-109-SAC	HG		HGG	5	vfl	E	27	Wilkins Peak	mudstone	interior		overbank	mix	C	in		41.2893	-109.398	Sage Creek			Wilkins Peak Member																				450	73150	1729	9	4	596	43
1625	20-110-SAC	HG		HGG	2.75	fl	E	27	Wilkins Peak	sandstone	interior		fluvial	mix	C	in		41.2893	-109.398	Sage Creek			Wilkins Peak Member																				450	46774	1370	0		494	37
1626	20-111-SAC	HG		HGG	5	vfl	F	27	Wilkins Peak	mudstone	interior		overbank	mix	C	in		41.2899	-109.398	Sage Creek			Wilkins Peak Member																				450	61757	1649	7	4	602	40
1627	20-112-SAC	HG		HGG	2.25	fu	F	27	Wilkins Peak	sandstone	interior		fluvial	mix	C	in		41.2899	-109.398	Sage Creek			Wilkins Peak Member																				450	51246	1306	0		623	36
1628	20-113-SAC	HG		HGG	3.25	vfu	G	27	Wilkins Peak	sandstone	interior		fluvial	mix	C	in		41.2902	-109.398	Sage Creek			Wilkins Peak Member																				450	59049	1511	7	4	407	37
1629	20-114-SAC	HG		HGG	2.25	fu	G	27	Wilkins Peak	sandstone	interior		fluvial	mix	C	in		41.2902	-109.398	Sage Creek			Wilkins Peak Member																				450	45234	1256	0		392	35
1630	20-115-SAC	HG		HGG	5	vfl	H	27	Wilkins Peak	mudstone	interior		overbank	mix	C	in		41.2915	-109.399	Sage Creek			Wilkins Peak Member																				450	82669	1851	10	4	540	40
1631	20-116-SAC	HG		HGG	2.75	fl	H	27	Wilkins Peak	sandstone	interior		fluvial	mix	C	in		41.2915	-109.399	Sage Creek			Wilkins Peak Member																				450	42548	1408	0		421	37
1632	20-117-SAC	HG		HGG	5	vfl	I	27	Wilkins Peak	mudstone	interior		overbank	mix	C	in		41.2946	-109.4	Sage Creek			Wilkins Peak Member																				450	62998	1623	0		473	38
1633	20-118-SAC	HG		HGG	2.75	fl	I	27	Wilkins Peak	sandstone	interior		fluvial	mix	C	in		41.2946	-109.4	Sage Creek			Wilkins Peak Member																				450	63356	1512	10	5	586	38
1634	20-026-SC	HG		HGG	3.25	vfu	E	29	Wilkins Peak	sandstone	periphery		fluvial	UT	S	out		41.0441	-109.416	Spring Creek			Wilkins Peak Member																				450	17944	1025	0		271	34
1635	20-027-SC	HG	MES	HGG	2.25	fu	I	29	Wilkins Peak	sandstone	periphery		fluvial	mix	C	in		41.0528	-109.415	Spring Creek			Wilkins Peak Member							0.663736	0.00659341	0.32967	0	0.323077	0.64482	0.0338266	0	0.0063425	0	0	0	0.012685	450	10553	865	0		206	34
1636	20-028-SC	HG		HGG	3.25	vfu	D	29	Wilkins Peak	sandstone	periphery		fluvial	UT	S	out		41.0401	-109.411	Spring Creek			Wilkins Peak Member																				450	33923	1214	0		227	33
1637	20-029-SC	HG		HGG	2.75	fl	D	29	Wilkins Peak	sandstone	periphery		fluvial	UT	S	out		41.041	-109.411	Spring Creek			Wilkins Peak Member																				450	16911	964	0		251	34
1638	20-030-SC	HG	MES	HGG	3.25	vfu	G	29	Wilkins Peak	sandstone	periphery		fluvial	UT	S	out		41.0432	-109.412	Spring Creek			Wilkins Peak Member							0.889655	0.0275862	0.0827586	0	0.0827586	0.778672	0.110664	0.00201207	0.0221328	0	0	0	0	450	16214	1058	0		231	35
1639	20-031-SC	HG		HGG	2.75	fl	H	29	Wilkins Peak	sandstone	periphery		fluvial	mix	C	in		41.0492	-109.416	Spring Creek			Wilkins Peak Member																				450	8494	963	6	3	305	37
1640	20-032-SC	HG		HGG	3.25	vfu	H	29	Wilkins Peak	sandstone	periphery		fluvial	mix	C	in		41.0538	-109.417	Spring Creek			Wilkins Peak Member																				450	10398	907	0		281	34
1641	20-033-SC	HG		HGG	2.75	fl	H	29	Wilkins Peak	sandstone	periphery		fluvial	mix	C	in		41.0545	-109.417	Spring Creek			Wilkins Peak Member																				450	10399	1014	0		266	37
1642	20-034-SC	HG		HGG	1.25	mu	I	29	Wilkins Peak	sandstone	periphery		fluvial	mix	C	in		41.0582	-109.416	Spring Creek			Wilkins Peak Member																				450	14361	1202	0		220	40
1643	20-130-TR	HG		HGG	3.25	vfu	A	29	Wilkins Peak	sandstone	periphery		fluvial	UT	S	out		41.0348	-109.407	Spring Creek			Wilkins Peak Member																				450	14054	786	0		210	32
1644	20-131-TR	HG		HGG	3.25	vfu	A	29	Wilkins Peak	sandstone	periphery		fluvial	UT	S	out		41.0349	-109.407	Spring Creek			Wilkins Peak Member																				450	14710	919	0		225	35
1645	20-132-TR	HG	MES	HGG	3.25	vfu	A	29	Wilkins Peak	sandstone	periphery		fluvial	UT	S	out		41.035	-109.407	Spring Creek			Wilkins Peak Member							0.855814	0.0325581	0.111628	0	0.111628	0.740443	0.114688	0	0.028169	0.00201207	0	0.00804829	0.00201207	450	15457	865	7	3	227	33
1646	20-167-RC4	HG		HGG	1.75	ml	T	29	Tipton	sandstone	periphery		fluvial	UT	S	out		41.0301	-109.418	Spring Creek			Tipton Member																				450	14464	708	12	3	139	30
1647	20-168-RC4	HG		HGG	2.75	fl	T	29	Tipton	sandstone	periphery		fluvial	UT	S	out		41.0303	-109.418	Spring Creek			Tipton Member																				450	16646	836	0		220	32
1648	20-169-RC4	HG		HGG	2.75	fl	T	29	Tipton	sandstone	periphery		fluvial	UT	S	out		41.0304	-109.418	Spring Creek			Tipton Member																				450	23867	945	0		131	31
1649	20-170-RC4	HG		HGG	2.75	fl	T	29	Tipton	sandstone	periphery		fluvial	UT	S	out		41.0305	-109.418	Spring Creek			Tipton Member																				450	22106	1005	0		188	33
1650	20-171-RC4	HG		HGG	2.75	fl	T	29	Tipton	sandstone	periphery		fluvial	UT	S	out		41.0307	-109.418	Spring Creek			Tipton Member																				450	14613	953	0		189	34
1651	20-172-RC4	HG	MES	HGG	3.25	vfu	T	29	Tipton	sandstone	periphery		fluvial	UT	S	out		41.0311	-109.418	Spring Creek			Tipton Member							0.862651	0.00963855	0.127711	0	0.127711	0.732106	0.147239	0	0.00817996	0	0	0	0.00408998	450	11323	1020	0		234	36
1652	20-142-SK	HG		HGG	2.75	fl	I	30	Wilkins Peak	sandstone	periphery		fluvial	mix	C	in		41.0727	-109.472	Sugarloaf Knoll			Wilkins Peak Member																				450	35640	1142	10	3	208	33
1653	20-143-SK	HG		HGG	2.75	fl	I	30	Wilkins Peak	sandstone	interior		fluvial	mix	C	in		41.1155	-109.428	Sugarloaf Knoll			Wilkins Peak Member																				450	69171	1549	0		475	40
1654	20-144-SM	HG		HGG	2.75	fl	D	31	Wilkins Peak	sandstone	interior		fluvial	mix	C	in		41.1507	-109.385	Sugarloaf Marsh			Wilkins Peak Member																				450	55479	1469	0		444	38
1655	20-145-SM	HG		HGG	5	vfl	D	31	Wilkins Peak	mudstone	interior		overbank	mix	C	in		41.1507	-109.385	Sugarloaf Marsh			Wilkins Peak Member																				450	52642	1343	7	4	489	36
1656	20-147-SM	HG		HGG	5	vfl	E	31	Wilkins Peak	mudstone	interior		overbank	mix	C	in		41.1536	-109.394	Sugarloaf Marsh			Wilkins Peak Member																				450	77339	1931	9	4	539	41
1657	20-149-SM	HG		HGG	5	vfl	F	31	Wilkins Peak	mudstone	interior		overbank	mix	C	in		41.1541	-109.395	Sugarloaf Marsh			Wilkins Peak Member																				450	66399	1657	9	4	459	41
1658	20-151-SM	HG		HGG	2.25	fu	G	31	Wilkins Peak	sandstone	interior		fluvial	mix	C	in		41.154	-109.396	Sugarloaf Marsh			Wilkins Peak Member																				450	47168	1272	0		464	34
1659	20-152-SM	HG		HGG	5	vfl	G	31	Wilkins Peak	mudstone	interior		overbank	mix	C	in		41.1542	-109.396	Sugarloaf Marsh			Wilkins Peak Member																				450	41075	2064	0		850	50
1660	20-153-SM	HG	HG	HGG	2.25	fu	G	31	Wilkins Peak	sandstone	interior		fluvial	mix	C	in		41.1542	-109.396	Sugarloaf Marsh			Wilkins Peak Member							0.537975	0.291139	0.170886	0	0.139241	0.403587	0.0896861	0.139013	0.0672646	0.0896861	0.0627803	0.0179372	0	450	45232	1277	0		395	35
1661	20-156-SM	HG		HGG	5	vfl	I	31	Wilkins Peak	mudstone	interior		overbank	mix	C	in		41.1552	-109.396	Sugarloaf Marsh			Wilkins Peak Member																				450	71338	1639	0		488	38
1662	20-081-10mr	HG		fs	3.25	vfu	A	35	Wilkins Peak	sandstone	interior		fluvial	mix	C	in		41.4643	-109.4	Whalen Butte			Wilkins Peak Member																				450	51840	1318	11	4	392	35
1663	20-082-10mr	HG	MES	fs	2.75	fl	B	35	Wilkins Peak	sandstone	interior		fluvial	mix	C	in		41.4637	-109.4	Whalen Butte			Wilkins Peak Member							0.517327	0.470297	0.0123762	0	0.00247525	0.459052	0	0.0883621	0.321121	0.0517241	0.0172414	0.012931	0.00215517	450	47911	1246	0		595	35
1664	20-083-10mr	HG		fs	3.25	vfu	C	35	Wilkins Peak	sandstone	interior		fluvial	mix	C	in		41.463	-109.402	Whalen Butte			Wilkins Peak Member																				450	43483	1560	16	4	501	41
1665	20-084-10mr	HG		fs	2.75	fl	D	35	Wilkins Peak	sandstone	interior		fluvial	mix	C	in		41.4611	-109.407	Whalen Butte			Wilkins Peak Member																				450	51763	1461	0		577	39
1666	20-085-10mr	HG		fs	5	vfl	E	35	Wilkins Peak	mudstone	interior		overbank	mix	C	in		41.4733	-109.411	Whalen Butte			Wilkins Peak Member																				450	62819	1678	13	4	571	41
1667	20-086-10MR	HG		HGG	3.25	vfu	F	35	Wilkins Peak	sandstone	interior		fluvial	mix	C	in		41.4592	-109.417	Whalen Butte			Wilkins Peak Member																				450	49312	1304	8	4	446	39
1668	20-087-10MR	HG		HGG	3.25	vfu	G	35	Wilkins Peak	sandstone	interior		littoral	mix	C	in		41.4596	-109.42	Whalen Butte			Wilkins Peak Member																				450	14103	1329	0		1542	53
1669	20-088-10MR	HG		HGG	5	vfl	H	35	Wilkins Peak	mudstone	interior		overbank	mix	C	in		41.4586	-109.42	Whalen Butte			Wilkins Peak Member																				450	53221	1724	7	4	629	43
1670	20-089-10MR	HG		HGG	3.25	vfu	I	35	Wilkins Peak	sandstone	interior		fluvial	mix	C	in		41.4578	-109.421	Whalen Butte			Wilkins Peak Member																				450	66757	1658	18	4	456	39
1671	20-001-WM	HG		HGG	2.75	fl	I	36	Wilkins Peak	sandstone	interior		fluvial	mix	C	in		41.5892	-109.308	White Mtn Road			Wilkins Peak Member																				450	76567	1819	40	5	981	45
1672	20-035-WD	HG		HGG	2.75	fl	I	37	Wilkins Peak	sandstone	periphery		fluvial	mix	C	in		41.0581	-109.465	Wildhorse Draw			Wilkins Peak Member																				450	15037	1019	0		246	34
1673	20-196-WD	HG		HGG	3.25	vfu	I	37	Wilkins Peak	sandstone	periphery		fluvial	mix	C	in		41.0548	-109.493	Wildhorse Draw			Wilkins Peak Member																				450	16930	1092	0		178	34
1674	20-197-WD	HG		HGG	2.75	fl	I	37	Wilkins Peak	sandstone	periphery		fluvial	mix	C	in		41.055	-109.493	Wildhorse Draw			Wilkins Peak Member																				450	24269	1127	0		568	37
1675	20-198-WD	HG		HGG	3.25	vfu	I	37	Wilkins Peak	sandstone	periphery		fluvial	mix	C	in		41.0553	-109.493	Wildhorse Draw			Wilkins Peak Member																				450	21296	1069	0		224	34
1676	20-199-WD	HG		HGG	3.25	vfu	G	37	Wilkins Peak	sandstone	periphery		fluvial	mix	C	in		41.0533	-109.464	Wildhorse Draw			Wilkins Peak Member																				450	14241	1085	0		183	36
1677	20-200-WD	HG		HGG	3.25	vfu	H	37	Wilkins Peak	sandstone	periphery		fluvial	mix	C	in		41.0556	-109.463	Wildhorse Draw			Wilkins Peak Member																				450	19784	1072	0		237	34
1678	20-201-WD	HG		HGG	3.25	vfu	I	37	Wilkins Peak	sandstone	periphery		fluvial	mix	C	in		41.056	-109.462	Wildhorse Draw			Wilkins Peak Member																				450	15425	936	12	3	254	34
1679	20-202-WD	HG		HGG	3.25	vfu	I	37	Wilkins Peak	sandstone	periphery		fluvial	mix	C	in		41.0562	-109.462	Wildhorse Draw			Wilkins Peak Member																				450	26424	1206	6	3	279	36
1680	20-061-WP	HG		HGG	2.25	fu	A	38	Wilkins Peak	sandstone	interior		fluvial	mix	C	in		41.4847	-109.34	Wilkins Peak			Wilkins Peak Member																				450	53579	1400	22	4	376	37
1681	20-062-WP	HG		HGG	5	vfl	B	38	Wilkins Peak	mudstone	interior		overbank	mix	C	in		41.485	-109.339	Wilkins Peak			Wilkins Peak Member																				450	47444	1850	0		1057	47
1682	20-063-WP	HG		HGG	3.75	vfl	B	38	Wilkins Peak	sandstone	interior		fluvial	mix	C	in		41.485	-109.339	Wilkins Peak			Wilkins Peak Member																				450	37995	1527	9	4	997	44
1683	20-064-WP	HG		HGG	3.25	vfu	C	38	Wilkins Peak	sandstone	interior		littoral	mix	C	in		41.4854	-109.338	Wilkins Peak			Wilkins Peak Member																				450	21423	1540	8	4	946	49
1684	20-065-WP	HG		HGG	2.75	fl	D	38	Wilkins Peak	sandstone	interior		fluvial	mix	C	in		41.4868	-109.339	Wilkins Peak			Wilkins Peak Member																				450	50921	1458	7	4	442	37
1685	20-066-WP	HG		HGG	2.25	fu	E	38	Wilkins Peak	sandstone	interior		fluvial	mix	C	in		41.4888	-109.338	Wilkins Peak			Wilkins Peak Member																				450	44941	1157	37	4	305	33
1686	20-069-WP	HG		HGG	5	vfl	H	38	Wilkins Peak	mudstone	interior		overbank	mix	C	in		41.4955	-109.34	Wilkins Peak			Wilkins Peak Member																				450	24634	1688	0		624	47
1687	20-070-WP	HG		HGG	5	vfl	I	38	Wilkins Peak	mudstone	interior		overbank	mix	C	in		41.4999	-109.34	Wilkins Peak			Wilkins Peak Member																				450	83308	1807	9	4	1040	46
1688	20-074-WP	HG		HGG	2.25	fu	D	38	Wilkins Peak	sandstone	interior		fluvial	mix	C	in		41.4941	-109.409	Wilkins Peak			Wilkins Peak Member																				450	39871	1245	15	4	916	42
1689	20-077-wp	HG		fs	5	vfl	F	38	Wilkins Peak	mudstone	interior		overbank	mix	C	in		41.4958	-109.405	Wilkins Peak			Wilkins Peak Member																				450	66862	1681	8	4	649	41
1690	20-078-wp	HG		fs	5	vfl	G	38	Wilkins Peak	mudstone	interior		overbank	mix	C	in		41.4965	-109.399	Wilkins Peak			Wilkins Peak Member																				450	56232	1744	17	5	612	41
1691	WB1	MES	HG	hgg	0.25	cu	W	80	Wilkins Peak	sandstone	exterior		fluvial	WY	E	out		41.4917	-108.018	Washakie Basin			Cathedral Bluffs Member							0.590551	0.346457	0.0629921	0	0	0.395238	0.361905	0.138095	0.0714286	0	0	0.0142857	0	450	31652.5	1441.47	0	5.4	522.87	40.44
1692	WB2	MES	HG	hgg	2.25	fu	W	80	Wilkins Peak	sandstone	exterior		fluvial	WY	E	out		41.4799	-108.042	Washakie Basin			Cathedral Bluffs Member							0.510204	0.367347	0.122449	0	0.0748299	0.384977	0.295775	0.107981	0.14554	0.00469484	0	0	0	450	44157.9	1523.97	6.65	3.42	525.52	37.49
1693	WB3	MES	HG	hgg	0.75	cl	W	79	Wilkins Peak	sandstone	exterior		fluvial	WY	E	out		41.4288	-107.894	Washakie Basin			Cathedral Bluffs Member							0.62585	0.29932	0.0748299	0	0.0204082	0.471698	0.292453	0.0471698	0.160377	0.00471698	0	0	0	450	34310.6	1398.92	72.4	5.22	559.06	39.3
1694	WB3C	MES	HG	hgg	3.75	vfl	W	79	Wilkins Peak	sandstone	exterior		fluvial	WY	E	out		41.4288	-107.894	Washakie Basin			Cathedral Bluffs Member							0.833333	0.166667	0	0	0	0.185185	0.777778	0.0277778	0.00925926	0	0	0	0	450	14327.2	1346.42	25.05	3.84	182.59	36.82
1695	WB4	MES	HG	hgg	2.25	fu	W	78	Wilkins Peak	sandstone	exterior		fluvial	WY	E	out		41.3147	-107.829	Washakie Basin			Cathedral Bluffs Member							0.668539	0.202247	0.129213	0	0.0449438	0.558333	0.2375	0.0416667	0.108333	0.00416667	0	0.0166667	0	450	28824.6	1400.14	0	6.34	393.17	37.19
1696	WB5	MES	HG	hgg	1.25	mu	W	77	Wilkins Peak	sandstone	exterior		fluvial	WY	E	out		41.2245	-107.805	Washakie Basin			Cathedral Bluffs Member							0.457516	0.431373	0.111111	0	0.0196078	0.394366	0.2723	0.117371	0.192488	0.00469484	0.00469484	0	0	450	46490.7	1420.79	0	5.24	610.8	36.82
1697	WB6	MES	HG	hgg	2.25	fu	T	76	Tipton	sandstone	exterior		fluvial	WY	E	out		41.1197	-107.67	Washakie Basin			Tipton Member							0.635193	0.16309	0.201717	0	0.103004	0.724576	0	0.110169	0.0508475	0.0127119	0	0	0	450	64431	1282	0	5.5	502.63	32.14
1698	WB7A	MES	HG	hgg	1.25	mu	W	75	Wasatch	sandstone	exterior		fluvial	CO-1	SE	out		40.9903	-107.915	Washakie Basin			Wasatch main body							0.571429	0.37619	0.052381	0	0.0190476	0.585253	0.0138249	0.225806	0.138249	0.0184332	0	0	0	450	84577	1505.3	0	4.5	575.54	33.7
1699	WB7B	MES	HG	hgg	1.25	mu	W	75	Wasatch	sandstone	exterior		fluvial	CO-1	SE	out		40.9655	-107.984	Washakie Basin			Wasatch main body							0.458128	0.359606	0.182266	0	0.152709	0.454128	0.0137615	0.183486	0.151376	0.0550459	0	0	0	450	100921	1683.86	10.72	4.12	533.83	34.64
1700	WB8	MES	HG	hgg	1.25	mu	CB	73	Wilkins Peak	sandstone	exterior		fluvial	CO-1	SE	out		40.9381	-108.151	Washakie Basin			Cathedral Bluffs Member							0.479263	0.460829	0.0599078	0	0.0460829	0.477679	0	0.3125	0.133929	0.03125	0	0	0	450	98329	1611.99	0	5.11	574.43	33.91
1704	WB11	MES	HG	hgg	1.75	ml	CB	34	Wilkins Peak	sandstone	exterior		fluvial	CO-1	SE	out		40.9604	-108.362	Washakie Basin			Cathedral Bluffs Member							0.598039	0.372549	0.0294118	0	0.0245098	0.55157	0.0134529	0.147982	0.192825	0.0717489	0	0	0	450	55058.4	1347.92	0	7.15	718.79	36.29
1705	21-CM-01	MES	EP	hgg	0.75	cl	CB	34	Wilkins Peak	sandstone	exterior		fluvial	CO-1	SE	out		40.9605	-108.361	Washakie Basin			Cathedral Bluffs Member																				450	82595.3	1625.09	0	5.28	707.76	36.86
1706	ARWT#2	Colby		hgg	2.75	fl	CB	40	Wilkins Peak	sandstone	exterior		fluvial	WM-2	SW	out		41.7233	-110.68	Angelo Ranch			Upper Sandstone Tongue, Wasatch Fm.																				450	11570.3	772.47	10.24	3.41	351.39	33.91
1707	ARBG#1	Colby		hgg	1.75	ml	CB	40	Wasatch	sandstone	exterior		fluvial	WM-2	SW	out		41.7235	-110.68	Angelo Ranch			Upper Road Hollow, Green River Fm.																				450	10405.6	960.6	0	5.1	326.9	36.74
1708	ARWMB#3	Colby		hgg	2.25	fu	W	40	Wasatch	sandstone	exterior		fluvial	WM-1	SW	out		41.7272	-110.679	Angelo Ranch			Wasatch main body																				450	19332.8	905.09	0	5.49	356.48	34.11
1709	ARWMB#2	Colby		hgg	2.25	fu	W	40	Wasatch	sandstone	exterior		fluvial	WM-1	SW	out		41.7272	-110.679	Angelo Ranch			Wasatch main body																				450	18603.9	861.49	0	5.19	639.16	35.96
1710	ARWMB#1	Colby		hgg	2.25	fu	W	40	Wasatch	sandstone	exterior		fluvial	WM-1	SW	out		41.7271	-110.679	Angelo Ranch			Wasatch main body																				450	10034	900.49	0	5.49	783.75	39.84
1711	CARSSU#2	Colby		hgg	2.75	fl	CB	43	Wilkins Peak	sandstone	exterior		fluvial	WM-2	SW	out	uw	41.6121	-110.854	Carter Creek			Upper Sandstone Tongue Wasatch Fm.																				450	16214.1	894.89	0	4.07	310.35	34.37
1712	CARSSU#1	Colby		hgg	1.75	ml	CB	43	Wilkins Peak	sandstone	exterior		fluvial	WM-2	SW	out		41.6121	-110.854	Carter Creek			Upper Sandstone Tongue Wasatch Fm.																				450	9344.7	772.29	0	4.33	261.53	33.55
1713	CARSST#2	Colby	CS	hgg	2.75	fl	W	43	Wasatch	sandstone	exterior		fluvial	WM-1	SW	out		41.6116	-110.854	Carter Creek			Sandstone Tongue Wasatch Fm.							0.330952	0.0357143	0.633333	0.0857143	0.397619	0.405622	0.0903614	0	0.0301205	0.0100402	0	0.0100402	0	450	16676	760.85	0	4.39	279.57	31.33
1714	CARSST#1	Colby	CS	hgg	1.75	ml	W	43	Wasatch	sandstone	exterior		fluvial	WM-1	SW	out		41.6115	-110.854	Carter Creek			Sandstone Tongue Wasatch Fm.							0.308756	0.0138249	0.677419	0.126728	0.364055	0.444215	0.0847107	0	0.0123967	0.00206612	0	0	0	450	13643.5	804.94	0	4.39	332.08	33.46
1715	CARCAL#5	Colby		hgg	1.75	ml	W	43	Wasatch	sandstone	exterior		fluvial	WM-1	SW	out		41.6113	-110.855	Carter Creek			Calcareous Member Wasatch Fm. (Wasatch Main Body)																				450	10241.7	891.02	0	4.35	281.29	35.73
1716	CARCALW#4	Colby		hgg	2.25	fu	W	43	Wasatch	sandstone	exterior		fluvial	WM-1	SW	out		41.6111	-110.855	Carter Creek			Calcareous Member Wasatch Fm. (Wasatch Main Body)																				450	20701.7	816.95	18.19	3.38	275.38	31.86
1717	CARCALCW#3	Colby		hgg	3.25	vfu	W	43	Wasatch	sandstone	exterior		fluvial	WM-1	SW	out		41.6111	-110.855	Carter Creek			Calcareous Member Wasatch Fm. (Wasatch Main Body)																				450	13702	711.49	0	3.87	220.25	31
1718	CARCALCW#2	Colby		hgg	1.25	mu	W	43	Wasatch	sandstone	exterior		fluvial	WM-1	SW	out		41.6106	-110.855	Carter Creek			Calcareous Member Wasatch Fm. (Wasatch Main Body)																				450	15840.3	695.85	47.59	4	193.02	30.63
1719	CARCALCW#1	Colby	CS	hgg	2.25	fu	W	43	Wasatch	sandstone	exterior		fluvial	WM-1	SW	out		41.6106	-110.855	Carter Creek			Calcareous Member Wasatch Fm. (Wasatch Main Body)							0.348371	0.0401003	0.611529	0.0651629	0.343358	0.455487	0.0351967	0	0.0331263	0	0	0.0186335	0	450	16046.1	680.63	58.85	4.25	233.44	30.43
1720	SSMTNBP#1	Colby	CS	hgg	2.25	fu	CB	70	Wilkins Peak	sandstone	exterior		fluvial	WM-2	SW	out	uw	41.5301	-110.889	South Sheep Mountain			Bullpen Mmr. Wasatch Fm.							0.3375	0.1	0.5625	0.06	0.2975	0.468683	0.107991	0.00431965	0.0820734	0.00647948	0	0	0	450	9950.7	674.41	0	4.39	612.71	34.79
1721	SSMTNBP#2	Colby		hgg	2.25	fu	CB	70	Wilkins Peak	sandstone	exterior		fluvial	WM-2	SW	out		41.5279	-110.891	South Sheep Mountain			Bullpen Mmr. Wasatch Fm.																				450	18650.2	1009.1	0	4.24	242.4	34.7
1722	SSMTNANG#1	Colby	CS	hgg	1.75	ml	CB	70	Wilkins Peak	sandstone	exterior		fluvial	WM-2	SW	out	uw	41.5267	-110.892	South Sheep Mountain			Angelo Mbr. Green River Fm.							0.315522	0.0203562	0.664122	0.0712468	0.363868	0.432323	0.139394	0.0020202	0.0141414	0.0040404	0	0.0181818	0	450	19889.9	1017.17	0	4.64	240.41	33.95
1723	MCR#3	Colby	CS	hgg	2.75	fl	CB	57	Wilkins Peak	sandstone	exterior		fluvial	WM-2	SW	out	uw	41.3308	-110.584	Muddy Creek			Desertion Point Tongue, Wasatch Fm.							0.318072	0.00963855	0.672289	0.0722892	0.455422	0.387097	0.0584677	0.00604839	0.00201613	0.0504032	0	0.0322581	0	450	14429.2	754.01	11.33	3.27	274.95	32.36
1724	MCR#2	Colby	CS	hgg	1.75	ml	CB	57	Wilkins Peak	sandstone	exterior		fluvial	WM-2	SW	out		41.331	-110.585	Muddy Creek			Desertion Point Tongue, Wasatch Fm.							0.183099	0.0305164	0.786385	0.110329	0.305164	0.543779	0.00230415	0.0046083	0.0253456	0.00230415	0	0.0046083	0	450	9344.03	597.91	0	3.73	213.99	29.51
1725	MCR#1	Colby		hgg	1.75	ml	CB	57	Wilkins Peak	sandstone	exterior		fluvial	WM-2	SW	out		41.3279	-110.59	Muddy Creek			Desertion Point Tongue, Wasatch Fm.																				450	10583.1	636.84	0	4.74	200.61	29.49
1726	MSCH#2	Colby		hgg	1.25	mu	T	57	Tipton	sandstone	exterior		fluvial	WM-2	SW	out	uw	41.3292	-110.602	Muddy Creek			Alkali Creek Toungue, Wasatch Fm.																				450	11806.9	628.89	0	3.31	266.62	29.81
1727	MSCH#1	Colby		hgg	0.75	cl	T	57	Tipton	sandstone	exterior		fluvial	WM-2	SW	out		41.3281	-110.602	Muddy Creek			Alkali Creek Toungue, Wasatch Fm.																				450	19652.6	1177.42	0	5.26	357.56	37.47
1728	MCWMB#7	Colby		hgg	2.25	fu	W	57	Wasatch	sandstone	exterior		fluvial	WM-1	SW	out		41.3288	-110.61	Muddy Creek			Wasatch main body																				450	9299.99	848.42	0	4.97	432.7	35.88
1729	MCWMB#6	Colby	CS	hgg	2.25	fu	W	57	Wasatch	sandstone	exterior		fluvial	WM-1	SW	out		41.3286	-110.611	Muddy Creek			Wasatch main body							0.310263	0.0572792	0.632458	0.0954654	0.298329	0.460922	0.138277	0	0.0480962	0.00400802	0	0.01002	0	450	11140.5	896.83	0	5.44	303.62	35.78
1730	MCWMB1	Colby		hgg	0.75	cl	W	57	Wasatch	sandstone	exterior		fluvial	WM-1	SW	out		41.3287	-110.612	Muddy Creek			Wasatch main body																				450	9909.7	976.31	74.2	4.68	324.75	36.29
1731	MCWMB5	Colby		hgg	2.25	fu	W	57	Wasatch	sandstone	exterior		fluvial	WM-1	SW	out		41.3286	-110.612	Muddy Creek			Wasatch main body																				450	42337.4	1212.18	0	4.61	283.69	31.91
1732	MCWMB#4	Colby		hgg	1.25	mu	W	57	Wasatch	sandstone	exterior		fluvial	WM-1	SW	out		41.3285	-110.612	Muddy Creek			Wasatch main body																				450	7995.53	907.75	143.82	5.9	299.97	35.89
1733	MCWMB4.5	Colby	CS	hgg	1.75	ml	W	57	Wasatch	sandstone	exterior		fluvial	WM-1	SW	out	uw	41.3285	-110.612	Muddy Creek			Wasatch main body							0.201835	0.0298165	0.768349	0.206422	0.293578	0.448578	0.0262582	0.00218818	0.0262582	0	0	0.00218818	0	450	19805.8	927.7	0	4.42	234.28	31.61
1734	MCWMB#2	Colby	CS	hgg	2.25	fu	W	57	Wasatch	sandstone	exterior		fluvial	WM-1	SW	out		41.3282	-110.611	Muddy Creek			Wasatch main body							0.331288	0.0907975	0.577914	0.127607	0.267485	0.503606	0.00120192	0.0144231	0.0745192	0.00600962	0	0.00120192	0	450	28080.5	1082.54	0	5	217.15	31.86
1735	MCWMB#3	Colby	CS	hgg	1.75	ml	W	57	Wasatch	sandstone	exterior		fluvial	WM-1	SW	out		41.3282	-110.612	Muddy Creek			Wasatch main body							0.332542	0.102138	0.565321	0.0760095	0.315914	0.438272	0.100823	0.00411523	0.0843621	0.00617284	0	0.00411523	0	450	24459.5	1051.47	0	4.53	669.12	35.42
1736	RWRWMB#1	Colby		hgg	2.25	fu	W	49	Wasatch	sandstone	exterior		fluvial	WM-1	SW	out		41.2867	-110.947	EVANSTON WY			Wasatch main body																				450	11000.2	743.39	0	4.15	215.79	31.77
1737	CR173UW-1	Colby	CS	hgg	2.25	fu	T	62	Tipton	sandstone	exterior		fluvial	WM-2	SW	out	uw	41.2063	-110.676	Piedmont Reservoir			Alkali Creek Toungue, Wasatch Fm.							0.377834	0.118388	0.503778	0.0755668	0.24937	0.442886	0.192385	0.00200401	0.0921844	0.00801603	0	0	0	450	14371.9	1161.21	0	5.28	333.56	37.29
1738	CCUW412#2	Colby	CS	hgg	2.75	fl	CB	44	Wilkins Peak	sandstone	exterior		fluvial	WM-2	SW	out	uw	41.4918	-110.494	Carter Road Cutoff			Desertion Point Tongue, Wasatch Fm.							0.293981	0.0509259	0.655093	0.0486111	0.363426	0.477366	0.0102881	0.0185185	0.026749	0.0102881	0	0.00617284	0	450	27384.9	1004.34	7.03	3.18	272.61	32.11
1739	CCUW412#1	Colby		hgg	2.25	fu	CB	44	Wilkins Peak	sandstone	exterior		fluvial	WM-2	SW	out		41.4916	-110.495	Carter Road Cutoff			Desertion Point Tongue, Wasatch Fm.																				450	20620.3	961.53	0	4.08	281.11	33.23
1740	RT30CB#1	Colby		hgg	2.25	fu	CB	59	Wilkins Peak	sandstone	exterior		fluvial	WM-2	SW	out		41.772	-110.396	Opal WY			Cathedral Bluffs Member																				450	15845.8	716.07	8.33	3.09	311.93	31.05
1741	I80RC1#1	Colby		hgg	1.75	ml	W	52	Wasatch	sandstone	exterior		fluvial	WM-1	SW	out		41.1661	-111.138	I80 Roadcut			Wasatch main body																				450	10784.5	641.47	0	3.7	260.09	30.68
1742	I80RC1#2	Colby	CS	hgg	1.75	ml	W	52	Wasatch	sandstone	exterior		fluvial	WM-1	SW	out		41.1661	-111.138	I80 Roadcut			Wasatch main body							0.278481	0.078481	0.643038	0.106329	0.382278	0.399533	0.0163551	0.00934579	0.0630841	0.0186916	0	0.0046729	0	450	15630.2	729.68	0	4.48	253.36	31.56
1743	I80 TRUST#5	Colby		hgg	2.25	fu	W	53	Wasatch	sandstone	exterior		fluvial	WM-1	SW	out		41.0708	-111.255	I80 State Trust Lands			Wasatch main body																				450	10989.5	860.3	0	3.93	391.89	36.75
1744	I80 TRUST#4	Colby	CS	hgg	2.25	fu	W	53	Wasatch	sandstone	exterior		fluvial	WM-1	SW	out	uw	41.0707	-111.255	I80 State Trust Lands			Wasatch main body							0.300469	0.140845	0.558685	0.112676	0.366197	0.326613	0.0705645	0.112903	0.00806452	0.0302419	0	0.0262097	0	450	39561	1248.25	0	5.79	614	36.41
1745	I80 TRUST#3	Colby		hgg	2.25	fu	W	53	Wasatch	sandstone	exterior		fluvial	WM-1	SW	out		41.0697	-111.256	I80 State Trust Lands			Wasatch main body																				450	23276.7	867.39	0	4.65	372.77	33.13
1746	I80 TRUST#2	Colby		hgg	2.25	fu	W	53	Wasatch	sandstone	exterior		fluvial	WM-1	SW	out		41.0699	-111.257	I80 State Trust Lands			Wasatch main body																				450	15779.5	935.76	0	4.37	396.54	36
1747	I80 TRUST#1	Colby	CS	hgg	2.25	fu	W	53	Wasatch	sandstone	exterior		fluvial	WM-1	SW	out		41.0686	-111.258	I80 State Trust Lands			Wasatch main body							0.388372	0.0139535	0.597674	0.0186047	0.506977	0.409091	0.0929752	0.00826446	0.00413223	0	0	0.0144628	0	450	22127.5	1089.69	8.17	3.1	207.06	35.08
1748	CR180CP#1	Colby		hgg	2.25	fu	W	63	Paleocene	sandstone	exterior		fluvial	WM-1	SW	out		41.2752	-110.728	Radio Tower Locality			Paleocene Evanston Fm.																				450	13175.2	675.26	0	4.52	297.54	29.76
1749	CR180CP#2	Colby		hgg	2.75	fl	W	63	Paleocene	sandstone	exterior		fluvial	WM-1	SW	out		41.2754	-110.727	Radio Tower Locality			Paleocene Evanston Fm.																				450	17399.7	740.74	7.09	2.9	240.92	29.18
1750	RTCR180#1	Colby		hgg	2.25	fu	W	63	Wasatch	sandstone	exterior		fluvial	WM-1	SW	out		41.2694	-110.713	Radio Tower Locality			Wasatch main body																				450	7006.44	512.14	0	3.59	185.03	28.11
1751	LRUW#1	Colby		hgg	2.75	fl	CB	45	Wilkins Peak	sandstone	exterior		fluvial	WM-2	SW	out		41.434	-110.466	Carter WY			Desertion Point Tongue, Wasatch Fm.																				450	28195.6	1163.11	0	4.2	289.5	33.75
1752	SDLYC#7	Colby		hgg	1.75	ml	W	55	Wasatch	sandstone	exterior		fluvial	WM-1	SW	out		41.0569	-110.98	Little Yellow Creek			Wasatch main body																				450	10214.7	807.12	0	4.16	360.25	35.5
1753	SDLYC#6	Colby		hgg	1.25	mu	W	55	Wasatch	sandstone	exterior		fluvial	WM-1	SW	out		41.0565	-110.981	Little Yellow Creek			Wasatch main body																				450	25237.6	911.94	12.03	3.18	291.03	31.72
1754	SDLYC#5	Colby		hgg	1.25	mu	W	55	Wasatch	sandstone	exterior		fluvial	WM-1	SW	out		41.0563	-110.981	Little Yellow Creek			Wasatch main body																				450	22554.9	1167.12	0	4.75	416.12	35.24
1755	SDLYC#4	Colby		hgg	1.75	ml	W	55	Wasatch	sandstone	exterior		fluvial	WM-1	SW	out		41.0562	-110.98	Little Yellow Creek			Wasatch main body																				450	12243.7	982.91	0	4.5	329.73	36.6
1756	SDLYC#3	Colby	CS	hgg	1.75	ml	W	55	Wasatch	sandstone	exterior		fluvial	WM-1	SW	out		41.0557	-110.981	Little Yellow Creek			Wasatch main body							0.270833	0.101852	0.627315	0.0856481	0.43287	0.346723	0.0063425	0.0845666	0.00845666	0.0190275	0	0.038055	0	450	27965.2	1011.5	0	4.99	331.47	32.48
1757	SDLYC#2	Colby		hgg	1.75	ml	W	55	Wasatch	sandstone	exterior		fluvial	WM-1	SW	out		41.0556	-110.981	Little Yellow Creek			Wasatch main body																				450	16236.8	949.9	0	5.08	391	35.44
1758	SDLYC#1	Colby		hgg	0.75	cl	W	55	Wasatch	sandstone	exterior		fluvial	WM-1	SW	out		41.0554	-110.981	Little Yellow Creek			Wasatch main body																				450	19714.8	1064.53	0	4.14	341.29	35.24
1759	RDLYC#1	Colby	CS	hgg	2.25	fu	W	55	Wasatch	sandstone	exterior		fluvial	WM-1	SW	out	uw	41.0414	-110.974	Little Yellow Creek			Wasatch main body							0.314554	0.115023	0.570423	0.0774648	0.340376	0.403651	0.107505	0.0020284	0.0973631	0.010142	0	0.00811359	0	450	20785.6	1132.18	0	4.52	363.4	35.81
1760	BELLR#5	Colby	CS	hgg	2.75	fl	W	42	Wasatch	sandstone	exterior		fluvial	WM-1	SW	out		40.8864	-111.369	Bell Ranch			Wasatch main body							0.495979	0.0268097	0.477212	0.0107239	0.343164	0.473361	0.196721	0.00204918	0.0184426	0	0	0.0266393	0	450	5991.81	870.06	0	4.79	239.18	36.37
1761	BELLR#4	Colby		hgg	2.25	fu	W	42	Wasatch	sandstone	exterior		fluvial	WM-1	SW	out		40.8862	-111.369	Bell Ranch			Wasatch main body																				450	14530.5	873.18	0	4.75	183.44	32.04
1762	BELLR#3	Colby		hgg	2.25	fu	W	42	Wasatch	sandstone	exterior		fluvial	WM-1	SW	out		40.8861	-111.37	Bell Ranch			Wasatch main body																				450	4629.67	905.75	0	4.67	233.48	37.17
1763	BELLR#2	Colby		hgg	0.75	cl	W	42	Wasatch	sandstone	exterior		fluvial	WM-1	SW	out		40.8859	-111.37	Bell Ranch			Wasatch main body																				450	4638.31	783.12	0	4.41	261.59	35.74
1764	BELLR#1	Colby		hgg	2.25	fu	W	42	Wasatch	sandstone	exterior		fluvial	WM-1	SW	out		40.8859	-111.37	Bell Ranch			Wasatch main body																				450	8493.63	1046.8	0	4.35	272.88	37.23
1765	CUTOFFC#3	Colby		hgg	1.75	ml	W	47	Wasatch	sandstone	exterior		fluvial	WM-1	SW	out		41.5227	-111.28	Cutoff Canyon			Wasatch main body																				450	5488.61	729.41	0	4.76	240.81	34.4
1766	CUTOFFC#2	Colby		hgg	1.75	ml	W	47	Wasatch	sandstone	exterior		fluvial	WM-1	SW	out		41.5218	-111.278	Cutoff Canyon			Wasatch main body																				450	12060.2	605.03	4.3	2.69	133.6	27.83
1767	CUTOFFC#1	Colby		hgg	2.75	fl	W	47	Wasatch	sandstone	exterior		fluvial	WM-1	SW	out		41.5214	-111.278	Cutoff Canyon			Wasatch main body																				450	15067.2	591.78	0	3.49	140.1	28.64
[truncated: 48 more columns]
