# Supplementary material
Source: publisher figshare collection journal article supplement (https://gsapubs.figshare.com/articles/dataset/_/24431119)
Supplement: Supplementary file 1 [file 1]

M.E. Smith, H.G. Gregorich, L.A. Gipson, R.C. Krueger, A.R. Carroll, E.C. Parrish, A.P. Walters, S. Honig, C. Schwaderer, S. Meyers, B.S. Singer, T.K. Lowenstein, and W.D. Arnuk, 2023, High-resolution X-ray fluorescence-based provenance mapping 19 of Eocene fluvial distributary fans that fed ancient Gosiute Lake, Wyoming, USA: GSA Bulletin, <https://doi.org/10.1130/B37207.1>.

## Supplemental Material

**Table S1.** Complete sample information, including location, stratigraphic position, lithology, grain size, petrographic modal composition, X-ray fluorescence-derived elemental abundances, and Gamma Ray spectrometer-derived elemental abundances.

**Figure S1.** Correlation matrices for rock sample composition data described in the manuscript: A) Petrography and XRF elemental concentrations; B) Petrography only; C) X-ray fluorescence-derived elemental concentrations; D) Gamma ray spectrometer and X-ray fluorescence-derived elemental concentrations.

**Figure S2.** Plots showing principal component analysis results for X-ray fluorescence-measured elemental concentrations: A) PC1 and PC2, showing data by geographic sector; B) PC1 and PC3, showing data by geographic sector; C) PC1 and PC2, showing data by region; D) PC1 and PC3, showing data by region; E) PC1 and PC2, showing data by lithofacies; D) PC1 and PC3, showing data by lithofacies.

**Figure S3.** Plots showing principal component analysis results for X-ray fluorescence and Gamma Ray spectrometer-measured elemental concentrations: A) PC1 and PC2, colors differentiate samples by lithology; B) PC1 and PC3, colors differentiate samples by lithology; C) PC1 and PC2, colors differentiate samples by region; D) PC1 and PC3, colors differentiate samples by region.

**Figure S4.** Scree plots for PCA analyses described in the report showing the distribution of variance among principal components.

**Figure S5.** Simple linear regressions used to project core scanner-derived XRF counts into *p*XRF-based elemental concentrations and provenance-focused PCA coordinates.

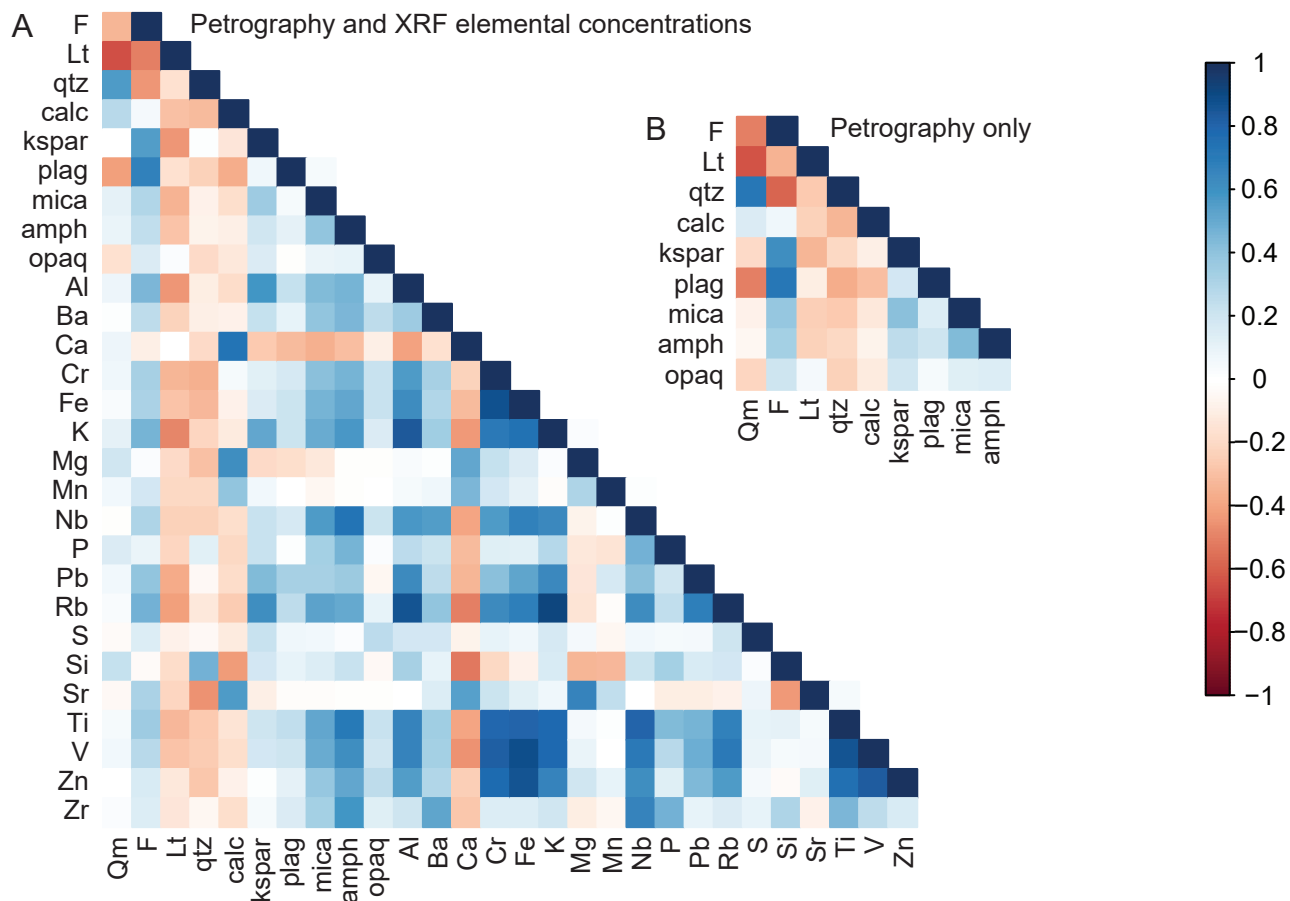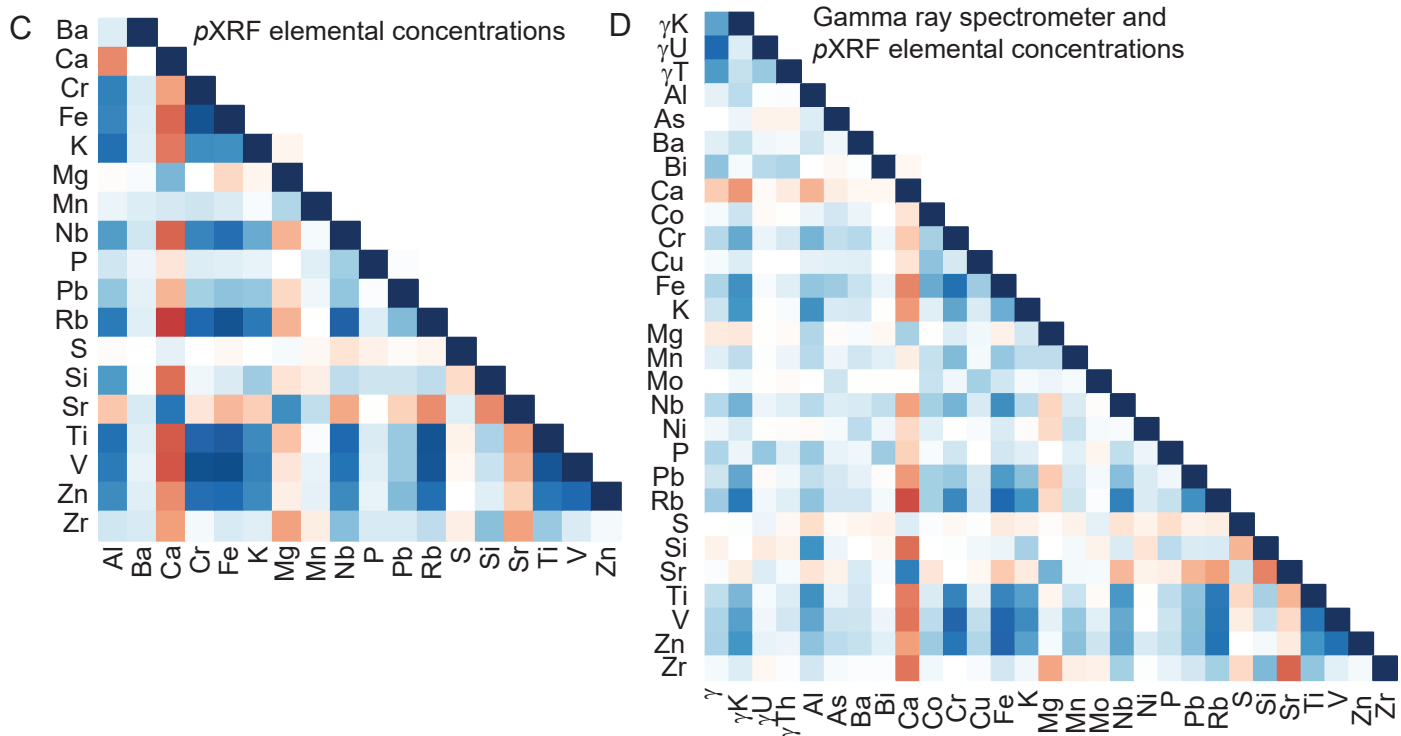



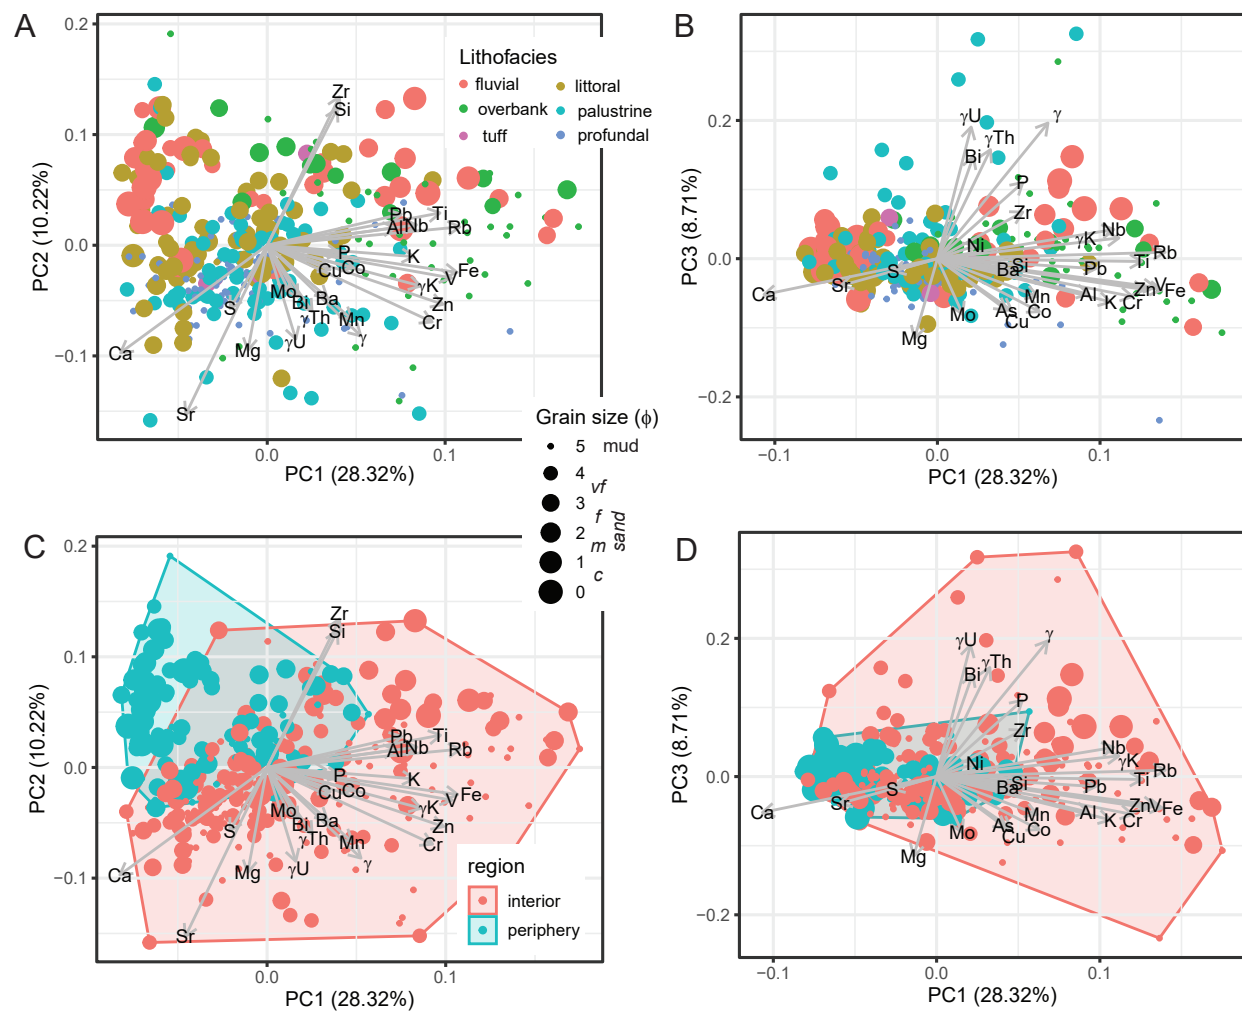

Figure S3

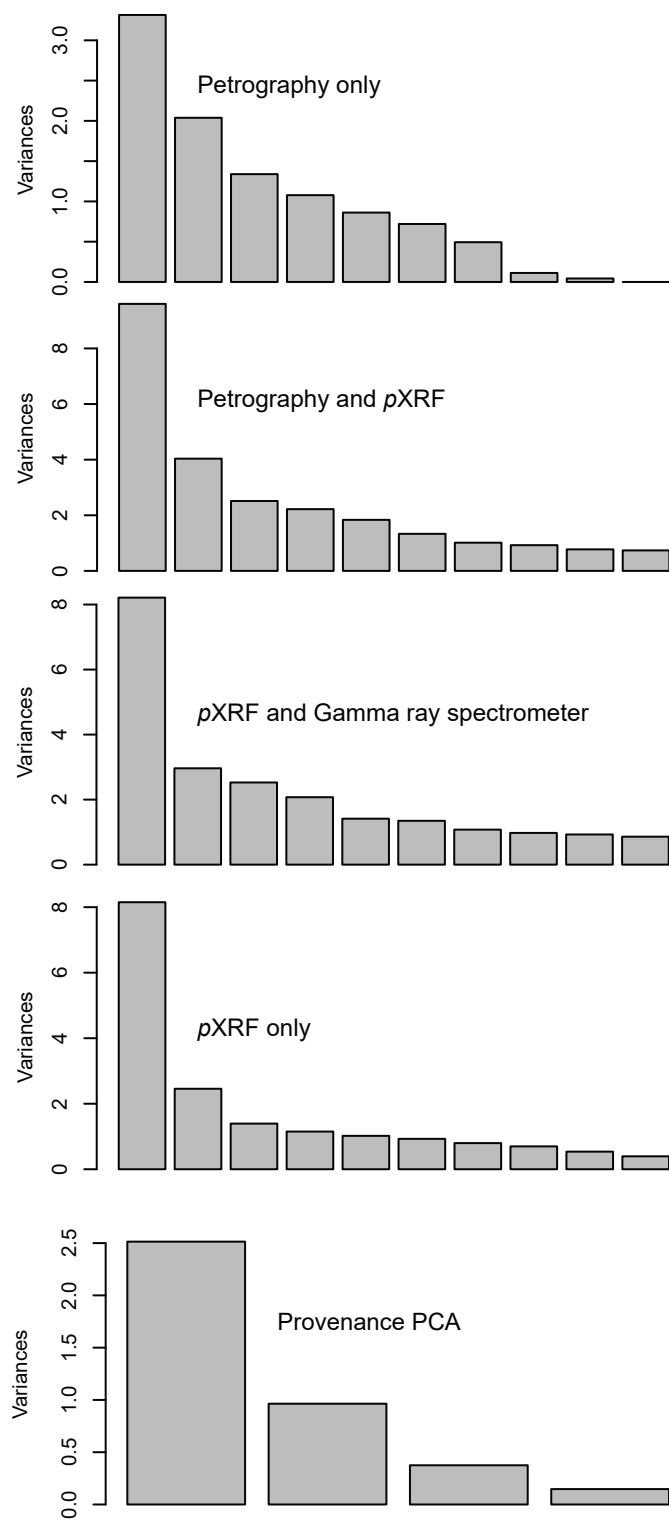

Figure S4

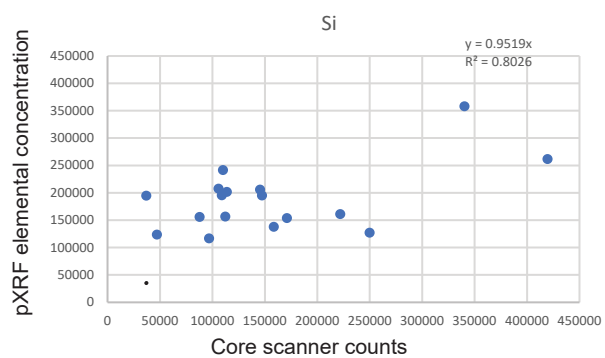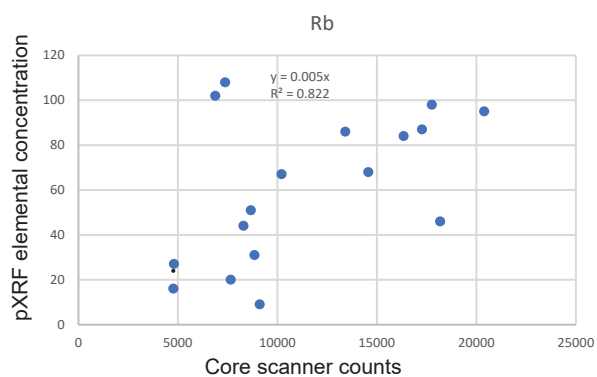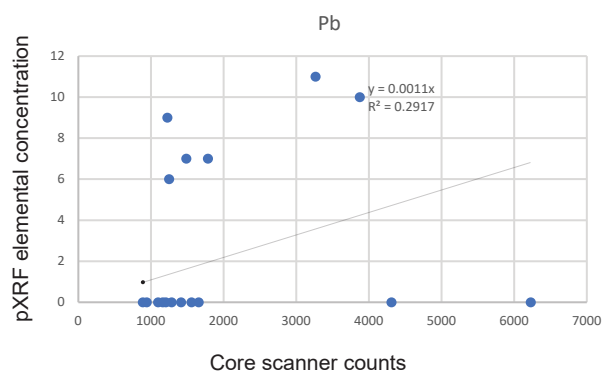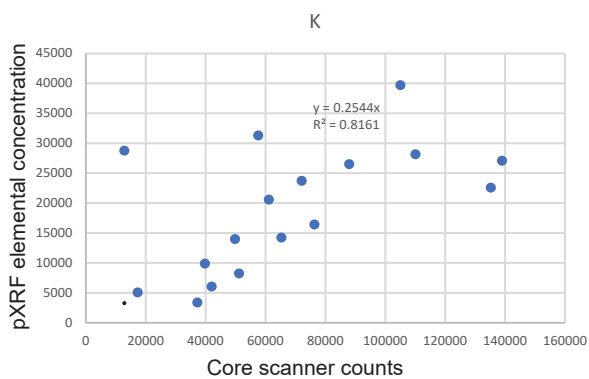

Figure S5
